1 **TITLE**

2 Regulation of mitophagy by the NSL complex underlies genetic risk for Parkinson's disease at  
3 Chr16q11.2 and on the MAPT H1 allele

4  
5

6 **AUTHOR INFORMATION**

7 Marc P.M. Soutar<sup>1,\*</sup>, Daniela Melandri<sup>1,\*</sup>, Benjamin O'Callaghan<sup>1,\*</sup>, Emily Annuario<sup>2,\*</sup>, Amy E.  
8 Monaghan<sup>3,4</sup>, Natalie J. Welsh<sup>5</sup>, Karishma D'Sa<sup>6</sup>, Sebastian Guelfi<sup>7</sup>, David Zhang<sup>1</sup>, Alan Pittman<sup>8</sup>,  
9 Daniah Trabzuni<sup>1</sup>, Kylie S. Pan<sup>1</sup>, Demis A. Kia<sup>1</sup>, Magda Bictash<sup>3,4</sup>, Sonia Gandhi<sup>1,6</sup>, Henry Houlden<sup>1</sup>,  
10 Mark R. Cookson<sup>9</sup>, Nicholas W Wood<sup>1</sup>, Andrew B. Singleton<sup>9</sup>, John Hardy<sup>1,4</sup>, Paul J. Whiting<sup>3,4</sup>,  
11 Cornelis Blauwendraat<sup>9</sup>, Alexander J. Whitworth<sup>5</sup>, Claudia Manzoni<sup>10</sup>, Mina Ryten<sup>7,†</sup>, Patrick A.  
12 Lewis<sup>1,11,†</sup> & H el ene Plun-Favreau<sup>1,†,‡</sup>

13

14 <sup>1</sup> UCL Queen Square Institute of Neurology, London, UK

15 <sup>2</sup> King's College, London, UK

16 <sup>3</sup> UCL Alzheimer's Research UK, Drug Discovery Institute, London, UK

17 <sup>4</sup> UCL Dementia Research Institute, London, UK

18 <sup>5</sup> MRC Mitochondrial Biology Unit, University of Cambridge, Cambridge, UK

19 <sup>6</sup> Francis Crick Institute, London, UK

20 <sup>7</sup> UCL NIHR Great Ormond Street Hospital, London, UK

21 <sup>8</sup> St Georges University, London, UK

22 <sup>9</sup> Laboratory of Neurogenetics, National Institute on Aging, National Institutes of Health, Bethesda,  
23 MD, USA

24 <sup>10</sup> School of Pharmacy, University of Reading, Reading, UK

25 <sup>11</sup> Royal Veterinary College, London, UK

26

27 \* and † these authors contributed equally to the work

28 ‡ corresponding author

29

30 **RUNNING TITLE**

31 New mitophagy Parkinson's risk genes

32 **ABSTRACT**

33 Parkinson's disease (PD) is a common incurable neurodegenerative disease. The identification of  
34 genetic variants via genome-wide association studies (GWAS) has considerably advanced our  
35 understanding of the PD genetic risk. Understanding the functional significance of the risk loci is  
36 now a critical step towards translating these genetic advances into an enhanced biological  
37 understanding of the disease. Impaired mitophagy is a key causative pathway in familial PD, but its  
38 relevance to idiopathic PD is unclear. We used a mitophagy screening assay to evaluate the  
39 functional significance of risk genes identified through GWAS. We identified two new regulators of  
40 PINK1-mitophagy, KAT8 and KANSL1, previously shown to modulate lysine acetylation. We show  
41 that KAT8 and KANSL1 modulate *PINK1* gene expression and subsequent PINK1-mitophagy. These  
42 findings suggest PINK1-mitophagy is a contributing factor to idiopathic PD. *KANSL1* is located  
43 on chromosome 17q21 where the risk associated gene has long been considered to be *MAPT*. While  
44 our data does not exclude a possible association between the *MAPT* gene and PD, it provides strong  
45 evidence that *KANSL1* plays a crucial role in the disease. Finally, these results enrich our  
46 understanding of physiological events regulating mitophagy and establish a novel pathway for drug  
47 targeting in neurodegeneration.

48

49 **KEY WORDS**

50 GWAS / KANSL1 / KAT8 / mitophagy / Parkinson's disease

51

52

## 53 INTRODUCTION

54            Parkinson's disease (PD) is the most common movement disorder of old age and afflicts  
55 more than 125,000 in the UK (Hardy *et al.*, 2009). Temporary symptomatic relief remains the  
56 cornerstone of current treatments, with no disease-modifying therapies yet available (Connolly and  
57 Lang, 2014). Until recently, the genetic basis for PD was limited to family-based linkage studies,  
58 favouring the identification of rare Mendelian genes of high penetrance and effect. However,  
59 genome-wide association studies (GWAS) have identified large numbers of common genetic variants  
60 linked to increased risk of developing the disease (Chang *et al.*, 2017; Nalls *et al.*, 2019). While these  
61 genetic discoveries have led to a rapid improvement in our understanding of the genetic  
62 architecture of PD (Nalls *et al.*, 2011), they have resulted in two major challenges for the research  
63 community. First, conclusively identifying the causal gene(s) for a given risk locus, and secondly  
64 dissecting their contribution to disease pathogenesis. Addressing these challenges is critical for  
65 moving beyond genetic insights to developing new disease-modifying strategies for PD.

66            Previous functional analyses of *PINK1* and *PRKN*, two genes associated with autosomal  
67 recessive PD, have highlighted the selective degradation of damaged mitochondria (mitophagy) as a  
68 key contributor to disease pathogenesis. In mammalian cells, the mitochondrial kinase PINK1  
69 selectively accumulates at the surface of damaged mitochondria, where it phosphorylates ubiquitin,  
70 leading to the recruitment and phosphorylation of the E3 ubiquitin ligase Parkin. The recruitment of  
71 autophagy receptors leads to the engulfment of damaged mitochondria in autophagosomes, and  
72 ultimately fusion with lysosomes (Narendra *et al.*, 2008, 2010; Kazlauskaitė *et al.*, 2014; Shiba-  
73 Fukushima *et al.*, 2014; Lazarou *et al.*, 2015; McWilliams and Muqit, 2017). It has subsequently  
74 become clear that other PD-associated Mendelian genes, such as *FBXO7*, *DJ-1* and *VPS35* (Plotegher  
75 and Duchen, 2017), are implicated in the regulation of PINK1-mediated mitochondrial quality  
76 control. Based upon these data, we hypothesised that PD-GWAS candidate genes may also be  
77 involved in this process, providing a mechanistic link between these genes and the aetiology of  
78 idiopathic PD. In order to test that hypothesis, we used functional genomics to prioritise candidate  
79 genes at the PD GWAS loci, and we developed a biological screening assay as a tool to identify genes  
80 that regulate PINK1-mitophagy, and as such, are very likely to be genes that increase the risk of  
81 developing PD.

82            In this study, we show that *KAT8* and *KANSL1*, two genes that were previously shown to be  
83 part of the same lysine acetylase complex partially located at the mitochondria (Chatterjee *et al.*,  
84 2016), are new and important regulators of *PINK1* gene transcription and PINK1-mediated  
85 mitochondrial quality control. These findings suggest mitophagy contributes to idiopathic PD and  
86 provides a proof of principle for functional screening approaches to identify causative genes in

87 GWAS loci. Finally, these results suggest lysine acetylation as a potential new avenue for mitophagy  
88 modulation and therapeutic intervention.

89

## 90 **RESULTS**

91 Genomic analyses of PD have identified over 80 loci associated with an increased lifetime  
92 risk for disease (Chang *et al.*, 2017). In contrast to Mendelian PD genes, however, the assignment of  
93 a causative gene to a risk locus is often challenging. In order to identify new risk genes for PD, we  
94 undertook a triage of PD GWAS candidate genes using a combination of methods: i) Colocalization  
95 (Coloc) and transcriptome-wide association analysis (TWAS) (Giambartolomei *et al.*, 2014) using  
96 expression quantitative trait loci (eQTLs) information derived from Braineac (Ramasamy *et al.*,  
97 2014), GTEx and CommonMind resources (Lonsdale *et al.*, 2013; Kia *et al.*, 2019) to link PD risk  
98 variants with specific genes, ii) weighted protein-protein interaction (PPI) network analysis  
99 (WPPINA)(Ferrari *et al.*, 2018) based on Mendelian genes associated with PD, and iii) the prioritised  
100 gene set as described in PD-GWAS (Nalls *et al.*, 2014; Chang *et al.*, 2017). This resulted in the  
101 nomination of 31 open reading frames (ORFs) as putatively causal for associations at PD risk loci.  
102 55% of these genes were prioritised through multiple techniques, with three out of 31 genes (*KAT8*,  
103 *CTSB* and *NCKIPSD*) identified through all three prioritization methods (Extended Data Fig. 1A). The  
104 31 genes, together with 7 PD Mendelian genes and lysosomal storage disorder genes, previously  
105 shown to be enriched for rare, likely damaging variants in PD (Robak *et al.*, 2017), were then taken  
106 forward for functional analysis (Fig. 1A).

107 Based upon extensive data implicating impaired mitophagy in the aetiology of familial PD,  
108 we hypothesized that additional PD-GWAS candidate genes, involved in the most common,  
109 idiopathic form of the disease, may play a role in this process. In order to test whether the 38  
110 prioritised genes have a role in PINK1-mitophagy, we developed and optimized a high content  
111 screening (HCS) assay for phosphorylation of ubiquitin at serine 65 (pUb(Ser65)), a PINK1-dependent  
112 mitophagy marker (Hou *et al.*, 2018), following mitochondrial depolarization (Fig. 1B). The 38  
113 prioritised genes were individually knocked down (KD) using siRNA in Parkin over-expressing (POE)-  
114 SHSY5Y human neuroblastoma cells. Increased mitochondrial clearance following mitochondrial  
115 depolarization induced by treatment with 10  $\mu$ M of oligomycin/antimycin A (O/A) was validated as  
116 an endpoint for mitophagy (Extended Data Fig. 1B). Over 97% of the pUb(Ser65) signal colocalised  
117 with the TOM20 mitochondrial marker in O/A treated cells (Extended Data Fig. 1C, D). siRNA KD  
118 efficiency was validated using both a pool of *PINK1* siRNA, which decreased O/A induced pUb(Ser65)  
119 and subsequent TOM20 degradation (Extended Data Fig. 1E-G) without decreasing cell viability  
120 (Extended Data Fig. 2A-B), and a pool of Polo-like kinase 1 (PLK-1) siRNA that decreased cell viability

121 by apoptosis (Extended Data Fig. 2A-B). The siRNA pools for the 38 candidate genes, together with  
122 controls, were screened in duplicate on each plate, across three replicate plates per run. Hits were  
123 identified as those wells where O/A-induced pUb(Ser65) was decreased or increased at greater than  
124 two standard deviations from the mean of the scramble (SCR) negative control siRNA.

125 *KAT8* was selected based on reproducible downregulation of O/A-induced PINK1-dependent  
126 pUb(Ser65) across all three replicates (Fig. 1C and Extended Data Fig. 1H), without affecting cell  
127 viability (Extended Data Fig. 2C). Notably, *KAT8* was selected as a candidate gene on the basis of all  
128 three prioritization criteria – namely, proximity of the lead SNP to an ORF (Fig 1D), colocalization of a  
129 brain-derived eQTL signal with a PD GWAS association signal (Extended Data Fig. 3) and evidence of  
130 PPI with a known PD gene (Fig. 1A). Furthermore, we find that colocalization and TWAS (Gusev *et al.*,  
131 2016) analyses at this locus are consistent with the KD models in the HCS assay (Supplementary  
132 Tables 1 and 2)(Kia *et al.*, 2019). Both methods predict that the risk allele operates by reducing *KAT8*  
133 expression in PD cases versus controls. The effect of *KAT8* KD on pUb(Ser65) was further validated in  
134 POE SHSY5Y cells treated with 1  $\mu$ M O/A, using both immunoblotting (IB) and immunofluorescence  
135 (IF) (Fig. 1E-F and Extended Data Fig. 4). In order to assess whether other lysine acetyltransferases  
136 (KATs) could regulate PINK1-dependent mitophagy, the pUb(Ser65) screen was repeated in POE  
137 SHSY5Y cells silenced for 22 other KATs (Simon *et al.*, 2016; Sheikh and Akhtar, 2019). Only *KAT8* KD  
138 led to a decreased pUb(Ser65) signal, emphasising the specificity of the *KAT8* KD effect on  
139 pUb(Ser65) (Fig. 1G and Supplementary Table 3).

140 These functional data complement and support the omic prioritization of *KAT8* as a  
141 causative gene candidate for the chromosome 16q11.2 PD associated locus (Fig. 1D). To gain further  
142 insight into a possible role for *KAT8* in the aetiology of PD, we explored the known functional  
143 interactions of this protein. *KAT8* has previously been shown to partially localise to mitochondria as  
144 part of the NSL complex together with *KANSL1*, *KANSL2*, *KANSL3*, and *MCRS1* (Chatterjee *et al.*,  
145 2016). To test whether other components of the NSL complex also modulate mitophagy, the  
146 pUb(Ser65) screen was repeated in POE SHSY5Y cells silenced for each of the nine NSL components  
147 (HCFC1, *KANSL1*, *KANSL2*, *KANSL3*, *KAT8*, *MCRS1*, *OGT*, *PHF20*, *WDR5*). Notably, reduction of  
148 *KANSL1*, *KANSL2*, *KANSL3*, *MCRS1* and *KAT8* expression led to decreased pUb(Ser65) after 1.5 or 3 h  
149 O/A treatment (Fig. 2A and Extended Data Fig. 5). Interestingly, *KANSL1* is another PD GWAS  
150 candidate gene (Chang *et al.*, 2017). The effect of *KANSL1* KD on pUb(Ser65) was further validated in  
151 POE SHSY5Y cells treated with 1  $\mu$ M O/A, using both IF and IB (Fig. 2B-E). The effect of the *KAT8* and  
152 *KANSL1* KD on pUb(Ser65) was confirmed in WT SHSY5Y cells expressing endogenous levels of  
153 Parkin, and in the astrogloma H4 cell line (Extended Data Fig. 6). In order to further assess the effect  
154 of *KAT8* and *KANSL1* KD on PINK1 activity, we measured pUb(Ser65) levels over time (Fig. 3A-B), as

155 well as Parkin recruitment (Fig. 3C-D) and phosphorylation at Ser65 (pParkin(Ser65)) (Fig. 3E-F)  
156 (Kazlauskaitė *et al.*, 2014). While individual KD of either KANSL1 or KAT8 affect phosphorylation  
157 (mean % of pParkin(Ser65) positive mitochondria in O/A-treated cells: SCR 19.601±3.927, PINK1  
158 10.426 ±4.083, KANSL1 12.929±3.214, KAT8 17.115±3.688) and recruitment (mean ratio of  
159 mitochondrial FLAG intensity in O/A treated cells: SCR 2.185±0.232, PINK1 1.485±0.222, KANSL1  
160 1.672±0.187, KAT8 2.069±0.213) of Parkin, KANSL1 KD decreased PINK1-dependent activity more  
161 efficiently than KAT8 KD (Fig. 3). KD of both KAT8 and KANSL1 reduced subsequent mitochondrial  
162 clearance in live POE-SHSY5Y cells, as measured by the mitophagy reporter mt-Keima (Katayama *et al.*  
163 *et al.*, 2011) (Fig 4). In order to assess the role of KAT8/KANSL1 in neuronal function and survival *in*  
164 *vivo*, we used *Drosophila* as a simple model system. Notably, the NSL complex was originally  
165 discovered in *Drosophila* through the homologs of *KAT8* and *KANSL1* (*mof* and *ns1*, respectively),  
166 but null mutations for these genes are associated with developmental lethality owing to profound  
167 transcriptional remodelling during development (Raja *et al.*, 2010). Therefore, we utilised inducible  
168 transgenic RNAi strains to target the KD of *mof* and *ns1* specifically in neuronal tissues. Using  
169 behavioural assays as a sensitive readout of neuronal function we found that pan-neuronal KD of  
170 *mof* or *ns1* caused progressive loss of motor (climbing) ability (Extended Data Fig. 7A, B), and also  
171 significantly shortened lifespan (Extended Data Fig. 7C, D). Interestingly, loss of *ns1* had a notably  
172 stronger effect than loss of *mof*. Consistent with this, KD of *ns1* but not *mof*, in either all neurons or  
173 only in dopaminergic (DA) neurons, caused the loss of DA neurons (Extended Data Fig. 7E, F).

174 *KANSL1* is located within the extensively studied inversion polymorphism on chromosome  
175 17q21 (Extended data Fig. 8A, B), which also contains *MAPT* - a gene frequently postulated to drive  
176 PD risk at this locus (Wray and Lewis, 2010). While the majority of individuals inherit this region in  
177 the direct orientation, up to 25% of individuals of European descent have a ~1mb sequence in the  
178 opposite orientation (Stefansson *et al.*, 2005; Zody *et al.*, 2008), inducing a larger ~1.3–1.6 Mb  
179 region of linkage disequilibrium (LD). Since this inversion polymorphism precludes recombination  
180 over a region of ~1.3–1.6 Mb, haplotype-specific polymorphisms have arisen resulting in the  
181 generation of two major haplotype clades, termed H1 (common haplotype) and H2 (inversion  
182 carriers), previously strongly linked to neurodegenerative disease (Hutton *et al.*, 1998; Pittman *et al.*,  
183 2005). Due to high LD, the genetics of this region have been hard to dissect, and robust eQTL  
184 analyses have been challenging due to the issue of polymorphisms within probe sequences in  
185 microarray-based analyses or mapping biases in RNA-seq-based analyses. Several variants  
186 (rs34579536, rs35833914 and rs34043286) are in high LD with the H1/H2 haplotype and are located  
187 within *KANSL1* (Fig. 5A,B), raising the possibility that they could directly impact on *KANSL1* protein  
188 function. In particular, one of the missense variants is a serine to proline change in *KANSL1* protein

189 sequence (S718P), and would therefore be predicted to alter the gross secondary structure of the  
190 KANSL1 protein (Fig. 5B). Furthermore, we explored the possibility that PD risk might be mediated at  
191 this locus through an effect on *KANSL1* expression. Using RNA sequencing data generated from 84  
192 brain samples (substantia nigra n=35; putamen n=49), for which we had access to whole exome  
193 sequencing and SNP genotyping data thus enabling mapping to personalised genomes (Guelfi *et al.*,  
194 2019), we performed allele-specific expression analysis. More specifically, we quantified the  
195 variation in expression between the H1 and H2 haplotypes (Supplementary Table 6) amongst  
196 heterozygotes. While we identified ASE sites within *MAPT* (Extended Data Fig. 9 and Supplementary  
197 Table 7), we also identified 4 sites of allele-specific expression in *KANSL1* (Fig. 5A), suggesting that  
198 the high PD risk H1 allele is associated with lower *KANSL1* expression, consistent with our functional  
199 assessment. Interestingly, sequence analysis of the human *KANSL1* haplotype revealed that the high  
200 risk H1 haplotype is the more recent “mutant” specific to *Homo sapiens*, and that other primates  
201 and mammals share the rarer non-risk ancestral H2 haplotype (Fig. 5B). To assess the specificity of  
202 the *KANSL1* KD effect on PINK1-mitophagy, 32 open reading frames in linkage disequilibrium on the  
203 H1 haplotype at the 17q21 locus (Extended data Fig. 8A, B and Supplementary Table 8) were  
204 knocked down individually and their effect on pUb(Ser65) was assessed. While the effect of *KANSL1*  
205 KD on pUb(Ser65) was confirmed, neither the KD of *MAPT*, nor the KD of each of the other 30 genes  
206 on this locus, led to a decreased in the pUb(Ser65) signal (Fig. 5C). These data confirm the selectivity  
207 of our mitophagy screening assay and suggest that *KANSL1* is likely to be a key PD risk gene at the  
208 17q21 locus.

209 Finally, we sought to study the mechanism of disrupted mitophagy in KAT8 and KANSL1  
210 deficient cells. KAT8 and the NSL complex are mainly responsible for the acetylation of lysine 16 on  
211 histone 4, and are therefore master regulators of transcription (Sheikh, Guhathakurta and Akhtar,  
212 2019). As a result, we hypothesised that they may regulate PINK1-mitophagy by regulating *PINK1*  
213 gene transcription. In order to test that hypothesis, we knocked down KAT8 and KANSL1 in POE  
214 SHSY5Y cells before extracting RNA and performing qPCR. KD of KANSL1 significantly reduced *PINK1*  
215 mRNA levels (Fig. 6B), while KAT8 had a modest effect, suggesting that KANSL1 KD may affect PINK1-  
216 mitophagy by modulating *PINK1* mRNA levels.

217

## 218 **DISCUSSION**

219 Since the first PD GWAS study was performed in 2006 (Fung *et al.*, 2006), GWAS have identified  
220 about 90 independent loci for PD (Nalls *et al.*, 2019). However, translating GWAS findings into a new  
221 molecular understanding of PD-associated pathways and new therapeutic targets has remained a major  
222 challenge for the scientific community. In order to screen for PD GWAS candidate genes that play a role in

223 PINK1-mitophagy, and thus are likely to be genuine risk genes for PD, we have set up and optimised a HCS  
224 for pUb(Ser65), a marker of PINK1-dependent mitophagy, a key pathway in PD pathogenesis. This  
225 approach allowed the successful identification of two new genes associated with increased PD risk, that  
226 play a role in mitophagy. Interestingly, these two genes were previously shown to be part of the same  
227 complex, the NSL complex.

228 This study demonstrates the substantial potential of functional screens to exploit genetic data by  
229 providing orthogonal information that can confidently identify new risk genes. This is particularly  
230 important in genomic regions with uniformly high linkage disequilibrium, such as the 17q21 inversion  
231 region which includes 32 ORFs of which many are highly expressed in brain and where existing fine-  
232 mapping and functional genomic analyses have been inconclusive. Interestingly, while *MAPT* has long been  
233 considered the risk associated gene at this locus, this has recently been questioned by Dong and  
234 colleagues, who also raised the significance of *KANSL1* in driving PD risk at the locus (Dong *et al.*, 2018).  
235 Furthermore, functional screening can simultaneously provide mechanistic insights as exemplified in this  
236 case by the novel insights we provide into the molecular events regulating mitochondrial quality control  
237 and which support a role for mitophagy as a contributing factor to sporadic PD. The *KAT8* and *KANSL1*-  
238 containing NSL complex was shown to promote histone acetylation and as such, is a master regulator of  
239 transcription (Sheikh, Guhathakurta and Akhtar, 2019). Our data demonstrate that *KAT8* and *KANSL1*  
240 modulate *PINK1* nuclear transcription and subsequent translation, leading to regulation of PINK1-  
241 dependent mitophagy. It was previously shown that depletion of *KAT8/KANSL1* causes significant  
242 downregulation of mitochondrial DNA transcription and translation, and ultimately impaired mitochondrial  
243 respiration (Chatterjee *et al.*, 2016). Future studies will need to determine whether *KAT8/KANSL1*-  
244 dependent modulation of mitochondrial DNA could regulate PINK1 mitochondrial accumulation and  
245 subsequent mitophagy. It has been further proposed that the *KAT8/KANSL1* complex has targets in the  
246 mitochondria other than the mitochondrial DNA (Chatterjee *et al.*, 2016). It will be interesting to  
247 determine whether the *KAT8/KANSL1* complex could acetylate ubiquitin, which has previously been shown  
248 to be acetylated on six out of its seven lysines (K6, K11, K27, K33, K48, K63) (Swatek and Komander, 2016).

249 Important genetic discoveries in PD, in particular, the identification of the *PINK1* (Valente *et al.*,  
250 2004) and *PRKN* genes (Kitada *et al.*, 1998), opened the field of selective mitophagy (McWilliams and  
251 Muqit, 2017). However, there is still a clear need for a better molecular understanding of mitochondrial  
252 quality control. Here we provide new insights into the mechanism by identifying two new molecular  
253 players, *KAT8* and *KANSL1*. These new regulators of mitophagy provide the first direct evidence for a role  
254 of the PINK1-mitophagy pathway in idiopathic PD and the convergence between familial and idiopathic  
255 pathways in disease. Taken together, these findings open a novel avenue for the therapeutic modulation of



256 mitophagy in PD, with potential implications across drug discovery in frontotemporal dementia and  
257 Alzheimer's disease, where mitophagy also plays an important role in disease pathogenesis (Chu, 2019).  
258

## 259 **METHODS**

260

### 261 **Reagents**

262 Oligomycin (mitochondrial complex V inhibitor) was purchased from Cayman Chemicals (11341) and  
263 from Sigma-Aldrich (O4876), and antimycin A (mitochondrial complex III inhibitor) was purchased  
264 from Sigma-Aldrich (A8674). All siRNAs were purchased as pre-designed siGENOME SMARTpools  
265 from Dharmacon: non-targeting (D-001206-13), PINK1 (M-004030-02), PLK1 (L-003290-00), KIF-11  
266 (L-003317-00), KAT8 (M-014800-00), KANSL1 (M-031748-00), KANSL2 (M-020816-01), KANSL3 (M-  
267 016928-01), HCFC1 (M-019953-01), MCRS1 (M-018557-00), OGT (M-019111-00), PHF20 (M-015234-  
268 02), WDR5 (M-013383-01). The following antibodies were used for immunocytochemistry: mouse  
269 anti TOM20 (Santa Cruz, sc-17764, 1:1000), rabbit anti phospho-ubiquitin (Ser65) (Cell Signaling,  
270 37642, 1:1000), rabbit anti phospho-Parkin (Ser65) (Abcam/Michael J. Fox Foundation, MJF17,  
271 1:250), rabbit anti FLAG (Sigma-Aldrich, F7425, 1:500), , AlexaFluor 488 goat anti rabbit (Invitrogen,  
272 A11008, 1:2000), AlexaFluor 568 goat anti mouse (Invitrogen, A11004, 1:2000). The following  
273 antibodies were used for immunoblotting: mouse anti TIM23 (BD Biosciences, 611223, 1:1000),  
274 rabbit anti phospho-ubiquitin (Ser65) (Merck Millipore, ABS1513-I, 1:1000), mouse anti GAPDH  
275 (Abcam, ab110305, 1:1000), rabbit anti KAT8 (Abcam, ab200600, 1:1000), IRDye 680LT donkey anti  
276 mouse (LI-COR Biosciences, 925-68022, 1:20000), IRDye 800CW donkey anti rabbit (LI-COR  
277 Biosciences, 925-32213, 1:20000).

278

### 279 **Selection of genes for High Content Screening**

280 Candidates for High Content Screening were selected based on i) WPPINA; ii) complex prioritization;  
281 and, iii) coloc analysis. WPPINA analysis is reported in (Ferrari *et al.*, 2018) where the 2014 PD GWAS  
282 (Nalls *et al.*, 2014) was analysed; candidate genes were selected among those prioritised and with  
283 an LD  $r^2 \geq 0.8$ . The same pipeline has then been additionally applied to the 2017 PD GWAS (Chang *et al.*, 2017)  
284 to update the list of candidate genes. Briefly, a protein-protein interaction network has  
285 been created based on the Mendelian genes for PD (seeds) using data from databases within the  
286 IMEx consortium. The network has been topologically analysed to extract the core network (i.e. the  
287 most interconnected part of the network). The core network contains the proteins/genes that can  
288 connect >60% of the initial seeds and are therefore considered relevant for sustaining communal  
289 processes and pathways, shared by the seeds. These processes have been evaluated by Gene  
290 Ontology Biological Processes enrichment analysis. The top SNPs of the 2017 PD GWAS have been  
291 used to extract open reading frames (ORFs) in cis-haplotypes defined by LD  $r^2 \geq 0.8$  (analysis  
292 performed in October 2017). These ORFs have been matched to the core network to identify

293 overlapping proteins/genes in relevant/shared pathways. Results of complex prioritization  
294 (neurocentric prioritization strategy) were gathered from (Chang *et al.*, 2017) where this strategy  
295 was applied to the 2017 PD GWAS. The coloc analysis was performed as reported in (Kia *et al.*,  
296 2019), posterior probabilities for the hypothesis that both traits, the regulation of expression of a  
297 given gene and the risk for PD share a causal variant (PPH4), were calculated for each gene, and  
298 genes with PPH4  $\geq 0.75$  were considered to have strong evidence for colocalization. Summary  
299 statistics were obtained from the most recent PD GWAS (Nalls *et al.*, 2019) and were used for  
300 regional association plotting using LocusZoom (Pruim *et al.*, 2010).

301

### 302 **Cell Culture and siRNA transfection**

303 POE SH-SY5Y cells are a kind gift from H. Ardley (Ardley *et al.*, 2003) and the mt-Keima POE SHSY5Y  
304 cells were a kind gift of C. Luft (Soutar *et al.*, 2019). Cells were cultured in Dulbecco's Modified Eagle  
305 (DMEM, Gibco, 11995-065) and supplemented with 10% heat-inactivated foetal bovine serum (FBS,  
306 Gibco) in a humidified chamber at 37 °C with 5% CO<sub>2</sub>. For siRNA transfection, cells were transfected  
307 using DharmaFECT1 transfection reagent (Dharmacon, T-2001-03) according to the manufacturer's  
308 instructions (for concentrations of siRNA, see sections below).

309

### 310 **ASEs**

311 Sites of ASE were identified as described by Guelfi and colleagues (Guelfi *et al.*, 2019) by mapping  
312 RNA-seq data to personalised genomes, an approach specifically chosen because it aims to minimise  
313 the impact of mapping biases. RNA-seq data generated from 49 putamen and 35 substantia nigra  
314 tissue samples from the UK Brain Expression Consortium was used for this analysis. All samples were  
315 obtained from neuropathologically normal individuals of European descent and sites with greater  
316 than 15 reads in a sample were tested for ASE. Only sites present in non-overlapping genes were  
317 considered and data from both the tissues were considered together to increase power. Sites  
318 with minimum FDR < 5% across samples were marked as ASE sites. Plots were generated using  
319 Gviz3, with gene and transcript details obtained from Ensembl v92.

320

### 321 **High Content siRNA Screen**

#### 322 **Cell plating and siRNA transfection**

323 siRNA was dispensed into Geltrex-coated 96-well CellCarrier Ultra plates (Perkin Elmer) at a final  
324 concentration of 30 nM using the Echo 555 acoustic liquid handler (Labcyte). For each well, 25  $\mu$ l of  
325 DMEM containing 4.8  $\mu$ l/ml of DharmaFECT1 transfection reagent was added and incubated for 30  
326 min before POE SH-SY5Y cells were seeded using the CyBio SELMA (Analytik Jena) at 15,000 cells per

327 well, 100  $\mu$ l per well in DMEM + 10% FBS. Cells were incubated for 72 h before treatment with 10  
328  $\mu$ M oligomycin/10  $\mu$ M antimycin for 3 h to induce mitophagy.

### 329 ***IF and Image Capture and Analysis***

330 Cells were fixed with 4% PFA (Sigma-Aldrich, F8775), then blocked and permeabilised with 10% FBS,  
331 0.25% Triton X-100 in PBS for 1 h, before immunostaining with pUb(Ser65) and TOM20 primary  
332 antibodies (in 10% FBS/PBS) for 2 h at room temperature. After 3x PBS washes, AlexaFluor 568 anti-  
333 mouse and 488 anti-rabbit secondary antibodies and Hoechst 33342 (Thermo Scientific, 62249) were  
334 added (in 10% FBS/PBS, 1:2000 dilution for all) and incubated for 1 h at room temperature.  
335 Following a final 3x PBS washes, plates were imaged using the Opera Phenix (Perkin Elmer). 5x fields  
336 of view and 4x 1  $\mu$ m Z-planes were acquired per well, using the 40X water objective, NA1.1. Images  
337 were analysed in an automated way using the Columbus 2.8 analysis system (Perkin Elmer) to  
338 measure the integrated intensity of pUb(Ser65) within the whole cell. First of all, the image was  
339 loaded as a maximum projection, before being segmented to identify the nuclei using the Hoechst  
340 33342 channel (method B). The cytoplasm was then identified using the “Find Cytoplasm” building  
341 block (method B) on the sum of the Hoechst and Alexa 568 channels. pUb(Ser65) was identified as  
342 spots (method B) on the Alexa 488 channel, before measuring their integrated intensity.

### 343 ***Screen quality control, data processing and candidate selection***

344 Screen plates were quality controlled based on the efficacy of the PINK1 siRNA control and O/A  
345 treatment window (minimum 3-fold). Data were checked for edge effects using Dotmatics Vortex  
346 visualization software. Raw data was quality controlled using robust Z prime > 0.5. Data were  
347 processed using Python for Z score calculation before visualization in Dotmatics Vortex. Candidates  
348 were considered a hit where Z score was  $\geq 2$  or  $\leq -2$ , and where replication of efficacy was seen both  
349 within and across plates.

### 350 ***siRNA libraries***

351 The siRNA libraries were purchased from Dharmacon as an ON-TARGETplus SMARTpool Cherry-pick  
352 siRNA library, 0.25 nmol in a 384-well plate. siRNAs were resuspended in RNase-free water for a final  
353 concentration of 20  $\mu$ M. SCR, PINK1 and PLK1 or KIF11 controls were added to the 384-well plate at  
354 a concentration of 20  $\mu$ M before dispensing into barcoded assay-ready plates.

355

### 356 ***Mitochondrial enrichment and Western blotting and WES***

357 POE SH-SY5Y and H4 cells were transfected with 100 nM siRNA and incubated for 72 h. Whole cell  
358 lysates were used from H4 cells, whereas POE SH-SY5Y lysates were first fractionated into  
359 cytoplasmic and mitochondria-enriched preparations. Samples were run on SDS-PAGE before IB with

360 the Odyssey<sup>®</sup> CLx Imager (LI-COR Biosciences). Mitochondrial enrichment and Western blotting  
361 protocols were described previously (Soutar *et al.*, 2018).

362

### 363 **Immunofluorescence**

364 POE SH-SY5Y cells were reverse transfected with 50 nM siRNA in 96-well CellCarrier Ultra plates  
365 according to the manufacturer's instructions and incubated for 72 h. Cells were then treated, fixed  
366 and stained as per the screening protocol detailed above (for treatment concentrations and times,  
367 see figures). For visualisation purposes, brightness and contrast settings were selected on the SCR  
368 controls and applied to all other images. Images are presented as maximum projections of the  
369 channels for one field of view. Insets show the Hoechst 33342 channel for the same field.

370

### 371 **Mitophagy measurement using the mt-Keima reporter**

372 Stable mt-Keima expressing POE SHSY5Y cells were reverse transfected with 50 nM siRNA in 96-well  
373 CellCarrier Ultra plates according to the manufacturer's instructions and incubated for 72 h. For the  
374 assay, the cell medium was replaced with phenol-free DMEM + 10% FBS containing Hoechst 33342  
375 (1:10000) and either DMSO or 1  $\mu$ M oligomycin/1  $\mu$ M antimycin to induce mitophagy. Cells were  
376 immediately imaged on the Opera Phenix (PerkinElmer) at 37 °C with 5% CO<sub>2</sub>, acquiring 15x single  
377 plane fields of view, using the 63X water objective, NA1.15. The following excitation wavelengths  
378 and emission filters were used: cytoplasmic Keima: 488 nm, 650–760 nm; lysosomal Keima: 561 nm,  
379 570–630 nm; Hoechst 33342: 375 nm, 435–480 nm. Images were analysed in an automated way  
380 using the Columbus 2.8 analysis system (Perkin Elmer) to measure the mitophagy index. Cells were  
381 identified using the nuclear signal of the Hoechst 33342 channel, before segmenting and measuring  
382 the area of the cytoplasmic and lysosomal mt-Keima. The mitophagy index was calculated as the  
383 ratio between the total area of lysosomal mitochondria and the total area of mt-Keima (sum of the  
384 cytoplasmic and lysosomal mtKeima areas) per well.

385

### 386 **RT-qPCR**

387 Total RNA was extracted from cells using the Monarch Total RNA Miniprep Kit (New England  
388 Bioscience) with inclusion of the optional on-column DNase treatment. 500ng of the RNA was then  
389 reverse transcribed with SuperScript<sup>™</sup> IV reverse transcriptase (Invitrogen). The cDNA product was  
390 then subjected to quantitative real-time PCR (qPCR) using Fast SYBR<sup>™</sup> Green Master Mix (Applied  
391 Biosystems) and gene specific primer pairs (Supplementary Table 9) on a QuantStudio<sup>™</sup> 7 Flex Real-  
392 Time PCR System (Applied Biosystems). Relative mRNA expression levels were calculated using the  
393  $2^{-\Delta\Delta C_t}$  method and *RPL18A* as the house-keeping gene.

394

### 395 ***Drosophila* stocks and husbandry**

396 Flies were raised under standard conditions in a humidified, temperature-controlled incubator with  
397 a 12h:12h light:dark cycle at 25°C, on food consisting of agar, cornmeal, molasses, propionic acid and  
398 yeast. The following strains were obtained from the Bloomington *Drosophila* Stock Center  
399 (RRID:SCR\_006457): *mof* RNAi lines, P{TRiP.JF01701} (RRID:BDSC\_31401); and P{TRiP.HMS00537}  
400 (RRID:BDSC\_58281); *ns1* RNAi lines, P{TRiP.HMJ22458} (RRID:BDSC\_58328); the pan-neuronal *nSyb-*  
401 *GAL4* driver (RRID:BDSC\_51941); and dopaminergic neuron driver (TH-GAL4; RRID:BDSC\_8848); and  
402 control (*lacZ*) RNAi P{GD936}v51446) from the Vienna *Drosophila* Resource Center  
403 (RRID:SCR\_013805). All experiments were conducted using male flies.

404

### 405 **Locomotor and lifespan assays**

406 The startle induced negative geotaxis (climbing) assay was performed using a counter-current  
407 apparatus. Briefly, 20-23 males were placed into the first chamber, tapped to the bottom, and given  
408 10 s to climb a 10 cm distance. This procedure was repeated five times (five chambers), and the  
409 number of flies that has remained into each chamber counted. The weighted performance of several  
410 group of flies for each genotype was normalized to the maximum possible score and expressed as  
411 *Climbing index* (Greene *et al.*, 2003).

412 For lifespan experiments, flies were grown under identical conditions at low-density. Progeny were  
413 collected under very light anaesthesia and kept in tubes of approximately 20 males each, around 50-  
414 100 in total. Flies were transferred every 2-3 days to fresh medium and the number of dead flies  
415 recorded. Percent survival was calculated at the end of the experiment after correcting for any  
416 accidental loss.

417

### 418 **Immunohistochemistry and sample preparation**

419 *Drosophila* brains were dissected from aged flies and immunostained as described previously  
420 (Whitworth *et al.*, 2005). Adult brains were dissected in PBS and fixed in 4% formaldehyde for 30  
421 min on ice, permeabilized in 0.3% Triton X-100 for 3 times 20 min, and blocked with 0.3% Triton X-  
422 100 plus 4% goat serum in PBS for 4 h at RT. Tissues were incubated with anti-tyrosine hydroxylase  
423 (Immunostar Inc. #22491), diluted in 0.3% Triton X-100 plus 4% goat serum in PBS for 72 h at 4°C,  
424 then rinsed 3 times 20 min with 0.3% Triton X-100 in PBS, and incubated with the appropriate  
425 fluorescent secondary antibodies overnight at 4°C. The tissues were washed 2 times in PBS and  
426 mounted on slides using Prolong Diamond Antifade mounting medium (Thermo Fisher Scientific).

427 Brains were imaged with a Zeiss LMS 880 confocal. Tyrosine hydroxylase-positive neurons were  
428 counted under blinded conditions.

429

### 430 **Statistical Analysis**

431 Intensity measurements from imaging experiments were normalised to SCR O/A for each  
432 experiment and presented as a percentage. N numbers are shown in figure legends and refer to the  
433 number of independent, replicate experiments. Within each experiment, the mean values of every  
434 condition were calculated from a minimum of 3 technical replicates. Intensity measurements from  
435 Western blot experiments were normalised to PINK1 O/A. GraphPad Prism 9 (La Jolla, California,  
436 USA) was used for statistical analyses and graph production. Data were subjected to either one-way  
437 or two-way ANOVA with Dunnett's post-hoc analysis for multiple comparisons, unless otherwise  
438 stated. All error bars indicate mean  $\pm$  standard deviation (SD) from replicate experiments.

439

440

441 **Acknowledgements.**

442 This work was supported in part by the UK Medical Research Council (MRC) funding to the Dementia  
443 Platform UK (MR/M02492X/1), MRC core funding to the High-Content Biology Platform at the MRC-  
444 UCL LMCB university unit (MC\_U12266B) and MRC MBU (MC\_UU\_00015/6), and by UCL  
445 Translational Research Office administered seed funds. MS, EA, CM and DT are funded by MRC  
446 MR/N026004/1. DM is supported by an MRC CASE studentship (MR/P016677/1). BO is supported by  
447 the Michael J. Fox Foundation for Parkinson's Research (MJFF-010437). AM, MB and PW are funded  
448 by ARUK (ARUK-2018DDI-UCL). MR was supported by the UK MRC through the award of Tenure-  
449 track Clinician Scientist Fellowship (MR/N008324/1). This work was supported in part by the  
450 Intramural Research Programs of the National Institute on Aging (NIA). We also acknowledge the  
451 support of the NIHR BRC award to University College London Hospitals, UCL. Finally, the authors  
452 would like to thank the Genome Aggregation Database (gnomAD) and the groups that provided  
453 exome and genome variant data to these resources. A full list of contributing groups can be found at  
454 <https://gnomad.broadinstitute.org/about>.

455

456 **Author Contributions.**

457 HPF, PL, JH, AW and PW conceived the idea. MS, DM, BO, EA, AM, DT, MB, PW, JH, AW, MR, PL and  
458 HPF designed the experiments. MS, DM, BO, EA, AM, NW, NW, KDS, SG, DZ, AP, DT, KP, CM, CB and  
459 HPF carried out analysis and experiments. MS, DM, BO, EA, AM, PW, CM, AW, MR, PL and HPF wrote  
460 the manuscript, with input from all co-authors. HPF, PL and MR supervised the project.

461

462 **Competing Interests:** The authors declare that they have no conflict of interest

463

464 **Correspondence and requests for materials should be addressed to [h.plun-favreau@ucl.ac.uk](mailto:h.plun-favreau@ucl.ac.uk).**

465

466



467 **REFERENCES**

- 468 Ardley, H. C. *et al.* (2003) 'Inhibition of proteasomal activity causes inclusion formation in neuronal  
469 and non-neuronal cells overexpressing Parkin.', *Molecular biology of the cell*, 14(11), pp. 4541–4556.  
470 doi: 10.1091/mbc.E03-02-0078.
- 471 Chang, D. *et al.* (2017) 'A meta-analysis of genome-wide association studies identifies 17 new  
472 Parkinson's disease risk loci', *Nature Genetics*. Nature Publishing Group, 49(10), pp. 1511–1516. doi:  
473 10.1038/ng.3955.
- 474 Chatterjee, A. *et al.* (2016) 'MOF Acetyl Transferase Regulates Transcription and Respiration in  
475 Mitochondria', *Cell*, 167(3), pp. 722-738.e23. doi: 10.1016/j.cell.2016.09.052.
- 476 Chu, C. T. (2019) 'Mechanisms of selective autophagy and mitophagy: Implications for  
477 neurodegenerative diseases', *Neurobiology of Disease*. Elsevier, 122(July 2018), pp. 23–34. doi:  
478 10.1016/j.nbd.2018.07.015.
- 479 Connolly, B. S. and Lang, A. E. (2014) 'Pharmacological Treatment of Parkinson Disease: A Review',  
480 *JAMA*, 311(16), pp. 1670–1683. doi: 10.1001/jama.2014.3654.
- 481 Dong, X. *et al.* (2018) 'Enhancers active in dopamine neurons are a primary link between genetic  
482 variation and neuropsychiatric disease', *Nature Neuroscience*, 21(10), pp. 1482–1492. doi:  
483 10.1038/s41593-018-0223-0.
- 484 Ferrari, R. *et al.* (2018) 'Stratification of candidate genes for Parkinson's disease using weighted  
485 protein-protein interaction network analysis', *BMC Genomics*, 19(1), p. 452. doi: 10.1186/s12864-  
486 018-4804-9.
- 487 Frega, M. *et al.* (2017) 'Rapid Neuronal Differentiation of Induced Pluripotent Stem Cells for  
488 Measuring Network Activity on Micro-electrode Arrays', *Journal of Visualized Experiments*. MyJoVE  
489 Corp, (119), p. e54900. doi: 10.3791/54900.
- 490 Fung, H.-C. *et al.* (2006) 'Genome-wide genotyping in Parkinson's disease and neurologically normal  
491 controls: first stage analysis and public release of data', *The Lancet Neurology*. Elsevier, 5(11), pp.  
492 911–916. doi: 10.1016/S1474-4422(06)70578-6.
- 493 Giambartolomei, C. *et al.* (2014) 'Bayesian Test for Colocalisation between Pairs of Genetic  
494 Association Studies Using Summary Statistics', *PLoS Genetics*. Edited by S. M. Williams, 10(5), p.  
495 e1004383. doi: 10.1371/journal.pgen.1004383.
- 496 Greene, J. C. *et al.* (2003) 'Mitochondrial pathology and apoptotic muscle degeneration in  
497 &emDrosophila parkin&em mutants', *Proceedings of the National Academy of  
498 Sciences*, 100(7), pp. 4078 LP – 4083. doi: 10.1073/pnas.0737556100.
- 499 Guelfi, S. *et al.* (2019) 'Regulatory sites for known and novel splicing in human basal ganglia are  
500 enriched for disease-relevant information', *bioRxiv*. doi: 10.1101/591156.

- 501 Gusev, A. *et al.* (2016) 'Integrative approaches for large-scale transcriptome-wide association  
502 studies', *Nature Genetics*, 48(3), pp. 245–252. doi: 10.1038/ng.3506.
- 503 Hardy, J. *et al.* (2009) 'The genetics of Parkinson's syndromes: a critical review', *Current Opinion in*  
504 *Genetics & Development*, 19(3), pp. 254–265. doi: <https://doi.org/10.1016/j.gde.2009.03.008>.
- 505 Hou, X. *et al.* (2018) 'Age- and disease-dependent increase of the mitophagy marker phospho-  
506 ubiquitin in normal aging and Lewy body disease', *Autophagy*. Taylor & Francis, 14(8), pp. 1404–  
507 1418. doi: 10.1080/15548627.2018.1461294.
- 508 Hutton, M. *et al.* (1998) 'Association of missense and 5'-splice-site mutations in tau with the  
509 inherited dementia FTDP-17', *Nature*, 393(6686), pp. 702–705. doi: 10.1038/31508.
- 510 Katayama, H. *et al.* (2011) 'A sensitive and quantitative technique for detecting autophagic events  
511 based on lysosomal delivery', *Chemistry and Biology*. Elsevier Ltd, 18(8), pp. 1042–1052. doi:  
512 10.1016/j.chembiol.2011.05.013.
- 513 Kazlauskaitė, A. *et al.* (2014) 'Parkin is activated by PINK1-dependent phosphorylation of ubiquitin at  
514 Ser65', *Biochemical Journal*, 460(1), pp. 127–141. doi: 10.1042/BJ20140334.
- 515 Kia, D. A. *et al.* (2019) 'Integration of eQTL and Parkinson's disease GWAS data implicates 11 disease  
516 genes', *bioRxiv*, p. 627216. doi: 10.1101/627216.
- 517 Kitada, T. *et al.* (1998) 'Mutations in the parkin gene cause autosomal recessive juvenile  
518 parkinsonism', *Nature*, 392(6676), pp. 605–608. doi: 10.1038/33416.
- 519 Lazarou, M. *et al.* (2015) 'The ubiquitin kinase PINK1 recruits autophagy receptors to induce  
520 mitophagy', *Nature*, 524(7565), pp. 309–314. doi: 10.1038/nature14893.
- 521 Lek, M. *et al.* (2016) 'Analysis of protein-coding genetic variation in 60,706 humans', *Nature*,  
522 536(7616), pp. 285–291. doi: 10.1038/nature19057.
- 523 Linda, K. *et al.* (2020) 'KANSL1 Deficiency Causes Neuronal Dysfunction by Oxidative Stress-Induced  
524 Autophagy', *bioRxiv*.
- 525 Lonsdale, J. *et al.* (2013) 'The Genotype-Tissue Expression (GTEx) project', *Nature Genetics*, 45(6),  
526 pp. 580–585. doi: 10.1038/ng.2653.
- 527 McWilliams, T. G. and Muqit, M. M. (2017) 'PINK1 and Parkin: emerging themes in mitochondrial  
528 homeostasis', *Current Opinion in Cell Biology*. Elsevier Ltd, 45, pp. 83–91. doi:  
529 10.1016/j.ceb.2017.03.013.
- 530 Nalls, M. A. *et al.* (2011) 'Imputation of sequence variants for identification of genetic risks for  
531 Parkinson's disease: a meta-analysis of genome-wide association studies', *The Lancet*. Elsevier Ltd,  
532 377(9766), pp. 641–649. doi: 10.1016/S0140-6736(10)62345-8.
- 533 Nalls, M. A. *et al.* (2014) 'Large-scale meta-analysis of genome-wide association data identifies six  
534 new risk loci for Parkinson's disease', *Nature Genetics*. Nature Publishing Group, 46(9), pp. 989–993.

- 535 doi: 10.1038/ng.3043.
- 536 Nalls, M. A. *et al.* (2019) 'Identification of novel risk loci, causal insights, and heritable risk for  
537 Parkinson's disease: a meta-analysis of genome-wide association studies', *The Lancet Neurology*,  
538 18(12), pp. 1091–1102. doi: 10.1016/S1474-4422(19)30320-5.
- 539 Narendra, D. *et al.* (2008) 'Parkin is recruited selectively to impaired mitochondria and promotes  
540 their autophagy', *Journal of Cell Biology*, 183(5), pp. 795–803. doi: 10.1083/jcb.200809125.
- 541 Narendra, D. P. *et al.* (2010) 'PINK1 Is Selectively Stabilized on Impaired Mitochondria to Activate  
542 Parkin', *PLoS Biology*. Edited by D. R. Green, 8(1), p. e1000298. doi: 10.1371/journal.pbio.1000298.
- 543 Pittman, A. M. *et al.* (2005) 'Linkage disequilibrium fine mapping and haplotype association analysis  
544 of the tau gene in progressive supranuclear palsy and corticobasal degeneration.', *Journal of medical  
545 genetics*, 42(11), pp. 837–46. doi: 10.1136/jmg.2005.031377.
- 546 Plotegher, N. and Duchen, M. R. (2017) 'Crosstalk between lysosomes and mitochondria in  
547 Parkinson's disease', *Frontiers in Cell and Developmental Biology*, 5(DEC), pp. 2011–2018. doi:  
548 10.3389/fcell.2017.00110.
- 549 Pruim, R. J. *et al.* (2010) 'LocusZoom: regional visualization of genome-wide association scan results',  
550 *Bioinformatics*. 2010/07/15. Oxford University Press, 26(18), pp. 2336–2337. doi:  
551 10.1093/bioinformatics/btq419.
- 552 Raja, S. J. *et al.* (2010) 'The Nonspecific Lethal Complex Is a Transcriptional Regulator in *Drosophila*',  
553 *Molecular Cell*. Elsevier Ltd, 38(6), pp. 827–841. doi: 10.1016/j.molcel.2010.05.021.
- 554 Ramasamy, A. *et al.* (2014) 'Genetic variability in the regulation of gene expression in ten regions of  
555 the human brain', *Nature Neuroscience*, 17(10), pp. 1418–1428. doi: 10.1038/nn.3801.
- 556 Robak, L. A. *et al.* (2017) 'Excessive burden of lysosomal storage disorder gene variants in  
557 Parkinson's disease', *Brain*, 140(12), pp. 3191–3203. doi: 10.1093/brain/awx285.
- 558 Sheikh, B. N. and Akhtar, A. (2019) 'The many lives of KATs — detectors, integrators and modulators  
559 of the cellular environment', *Nature Reviews Genetics*. Springer US, 20(January). doi:  
560 10.1038/s41576-018-0072-4.
- 561 Sheikh, B. N., Guhathakurta, S. and Akhtar, A. (2019) 'The non-specific lethal ( NSL ) complex at the  
562 crossroads of transcriptional control and cellular homeostasis ', *EMBO reports*, 20(7). doi:  
563 10.15252/embr.201847630.
- 564 Shiba-Fukushima, K. *et al.* (2014) 'Phosphorylation of Mitochondrial Polyubiquitin by PINK1  
565 Promotes Parkin Mitochondrial Tethering', *PLoS Genetics*, 10(12). doi:  
566 10.1371/journal.pgen.1004861.
- 567 Simon, R. P. *et al.* (2016) 'KATching-Up on Small Molecule Modulators of Lysine Acetyltransferases',  
568 *Journal of Medicinal Chemistry*, 59(4), pp. 1249–1270. doi: 10.1021/acs.jmedchem.5b01502.

- 569 Soutar, M. P. M. *et al.* (2018) 'AKT signalling selectively regulates PINK1 mitophagy in SHSY5Y cells  
570 and human iPSC-derived neurons', *Scientific Reports*, 8(1), p. 8855. doi: 10.1038/s41598-018-26949-  
571 6.
- 572 Soutar, M. P. M. *et al.* (2019) 'FBS/BSA media concentration determines CCCP's ability to depolarize  
573 mitochondria and activate PINK1-PRKN mitophagy', *Autophagy*. Taylor & Francis, 15(11), pp. 2002–  
574 2011. doi: 10.1080/15548627.2019.1603549.
- 575 Stefansson, H. *et al.* (2005) 'A common inversion under selection in Europeans', *Nature Genetics*,  
576 37(2), pp. 129–137. doi: 10.1038/ng1508.
- 577 Swatek, K. N. and Komander, D. (2016) 'Ubiquitin modifications', *Cell Research*. Nature Publishing  
578 Group, 26(4), pp. 399–422. doi: 10.1038/cr.2016.39.
- 579 Valente, E. M. *et al.* (2004) 'Hereditary early-onset Parkinson's disease caused by mutations in  
580 PINK1', *Science*, 304(5674), pp. 1158–1160. doi: 10.1126/science.1096284.
- 581 Whitworth, A. J. *et al.* (2005) 'Increased glutathione S-transferase activity  
582 rescues dopaminergic neuron loss in a *Drosophila* model of  
583 Parkinson's disease', *Proceedings of the National Academy of Sciences*, 102(22), pp. 8024 LP –  
584 8029. doi: 10.1073/pnas.0501078102.
- 585 Wray, S. and Lewis, P. A. (2010) 'A tangled web - tau and sporadic Parkinson's disease', *Frontiers in*  
586 *Psychiatry*, 1(DEC), pp. 1–7. doi: 10.3389/fpsyt.2010.00150.
- 587 Zody, M. C. *et al.* (2008) 'Evolutionary toggling of the MAPT 17q21.31 inversion region', *Nature*  
588 *Genetics*, 40(9), pp. 1076–1083. doi: 10.1038/ng.193.

589  
590  
591

## 592 **FIGURE LEGENDS**

593

594 **Figure 1 – High content mitophagy screen of PD risk genes identifies KAT8 as a modulator of**  
595 **pUb(Ser65) levels.**

596 **A.** The heat-map represents increasing evidence for gene prioritization (white, light blue, and dark  
597 blue: one, two, and three evidences, respectively). ColB = coloc analysis using Braineac, ColG = coloc  
598 analysis using GTEx, WPPINA = weighted protein interaction network; GWAS = genes prioritised in  
599 PD-GWAS (Chang *et al.*, 2017), MPD = Mendelian genes associated with PD, MLS = Mendelian genes  
600 associated with lysosomal storage disorders.

601 **B.** Workflow of the high content screen for O/A-induced pUb(Ser65) levels.

602 **C.** pUb(Ser65) Z-scores of one representative mitophagy screen plate.

603 **D.** Overview of the PD GWAS genetic signal at the *KAT8* locus.  
604 **E.** Representative IB of mitochondrial fractions from SCR, PINK1 and *KAT8* KD POE SH-SY5Y treated  
605 with 1  $\mu$ M O/A for 1.5 or 3 h.  
606 **F.** Quantification of pUb(Ser65) in E (n=5, one-way ANOVA with Dunnett's correction).  
607 **G.** pUb(Ser65) Z-scores of one representative KAT screen plate. See Supplementary Table 3 for the  
608 complete list of the genes screened.  
609 Data are shown as mean  $\pm$  SD.

610

611 **Figure 2 – KANSL1, another PD risk gene, also affects pUb(Ser65) levels.**

612 **A.** Quantification of pUb(Ser65) following treatment of SCR, PINK1 or NSL components siRNA KD POE  
613 SH-SY5Y cells with 1  $\mu$ M O/A for 1.5 h. Data are shown as mean  $\pm$  SD; n=6, one-way ANOVA with  
614 Dunnett's correction.  
615 **B.** Representative images of pUb(Ser65) following treatment of SCR, PINK1 and *KANSL1* KD POE SH-  
616 SY5Y cells with 1  $\mu$ M O/A for 3 h. Insets show the nuclei for the same fields. Scale bar: 20  $\mu$ m.  
617 **C.** Quantification of pUb(Ser65) in B (n=3, two-way ANOVA with Dunnett's correction).  
618 **D.** Representative IB of mitochondrial fractions from SCR, PINK1 and *KANSL1* KD POE SH-SY5Y  
619 treated with 1  $\mu$ M O/A for 1.5 or 3 h.  
620 **E.** Quantification of pUb(Ser65) in D (n=5, one-way ANOVA with Dunnett's correction).  
621 Data are shown as mean  $\pm$  SD.

622

623 **Figure 3 - KAT8 and KANSL1 knockdowns decreases PINK1-dependent activity.**

624 **A.** Representative images of pUb(Ser65) (green) following treatment of SCR, PINK1, *KAT8* and  
625 *KANSL1* KD POE SH-SY5Y cells with 1  $\mu$ M O/A for 0-7 h. Insets show the nuclei for the same fields.  
626 Scale bar: 20  $\mu$ m.  
627 **B.** Quantification of pUb(Ser65) in A (n=6, two-way ANOVA with Dunnett's correction). For details on  
628 the statistical test, see Supplementary Table 4.  
629 **C.** Representative images of FLAG-Parkin (green) following treatment of SCR, PINK1 and *KAT8* siRNA  
630 KD POE SH-SY5Y with 1  $\mu$ M O/A for 3 h. Scale bar: 20  $\mu$ m.  
631 **D.** Quantification of FLAG-Parkin recruitment to the mitochondria as a ratio of FLAG intensity in the  
632 mitochondria and in the cytosol in C (n=5, two-way ANOVA with Dunnett's correction).  
633 **E.** Representative images of pParkin (green) following treatment of SCR, PINK1 and *KAT8* siRNA KD  
634 POE SH-SY5Y with 1  $\mu$ M O/A for 3 h. Scale bar: 20  $\mu$ m.  
635 **F.** Quantification of pParkin levels in E (n=5, two-way ANOVA with Dunnett's correction).  
636 Data are shown as mean  $\pm$  SD.

637

638 **Figure 4 - KANSL1 and KAT8 knockdown decrease mitochondrial clearance.**

639 **A.** Representative images of mt-Keima following treatment of SCR, PINK1 and KAT8 siRNA KD POE  
640 SH-SY5Y with 1  $\mu$ M O/A for 0-8 h. Scale bar: 25  $\mu$ m.

641 **B.** Quantification of the mitophagy index, calculated as the ratio of the area of lysosomal mt-Keima  
642 signal and total mt-Keima signal in A (n=3, one-way ANOVA with Dunnett's correction). For details  
643 on the statistical test, see Supplementary Table 5.

644 Data are shown as mean  $\pm$  SD.

645

646 **Figure 5 – KANSL1, which presents ASE sites in LD with the H1/H2 SNP, is the only gene on the**  
647 **17q21 locus modulating pUb(Ser65) levels.**

648 **A.** ASEs derived from putamen and substantia nigra in high linkage disequilibrium with the H1/H2  
649 tagging SNP, rs12185268 and their position along the *KANSL1* gene. The missense variants track  
650 displays the variants annotated as missense by gnomAD v2.1.1(Lek *et al.*, 2016). The valid track  
651 displays the heterozygous sites (orange = missense) with an average read depth greater than 15  
652 reads across all samples, which were examined for ASE. The topmost track displays the FDR-  
653 corrected minimum  $-\log_{10}$  p-value across samples for the sites that show an ASE in at least one  
654 sample.

655 **B.** Conservation of the *KANSL1* protein across species. The four coding variants in the *KANSL1* gene  
656 are in high LD ( $r^2 > 0.8$ ) with the H1/H2 haplotypes.

657 **C.** pUb(Ser65) Z-scores of one representative 17q21 locus screen plate. See Supplementary Table 8  
658 for the complete list of the genes screened.

659

660 **Figure 6. KANSL1 knockdown reduces PINK1 mRNA levels in POE SHSY5Y cells.**

661 **A.** Ct values for *RPL18A* were unaffected by siRNA KD. n=6, one-way ANOVA with Dunnett's  
662 correction.

663 **B.** Relative *PINK1* mRNA expression levels in SCR, PINK1, KANSL1 and KAT8 siRNA KD POE SH-SY5Ys,  
664 as measured through RT-qPCR (n=6, one-way ANOVA with Dunnett's correction).

665 **C.** Relative *KANSL1* mRNA expression levels in SCR, PINK1, KANSL1 and KAT8 siRNA KD POE SH-  
666 SY5Ys, as measured through RT-qPCR (n=6, one-way ANOVA with Dunnett's correction).

667 **D.** Relative *KAT8* mRNA expression levels in SCR, PINK1, KANSL1 and KAT8 siRNA KD POE SH-SY5Ys,  
668 as measured through RT-qPCR (n=6, one-way ANOVA with Dunnett's correction).

669 Data are shown as mean  $\pm$  SD.

670

671

672 **EXTENDED FIGURE LEGENDS**

673 **Extended Data Figure 1. High Content siRNA Screen for modulators of pUb(Ser65).**

674 **A.** Venn diagram highlighting the three genes prioritised by means of three prediction techniques.

675 **B.** Fold decrease in TOM20 levels following 1.5 and 3 h treatment with 0.1, 1 and 10  $\mu\text{M}$  O/A,  
676 compared to DMSO control.

677 **C.** Representative images of TOM20 and pUb(Ser65) following 3 h treatment of SCR KD POE SH-SY5Y  
678 cells with 10  $\mu\text{M}$  O/A. Scale bar: 20  $\mu\text{m}$ .

679 **D.** Quantification of the co-localization in **C** as % of TOM20-positive pUb(Ser65) spots. Graph shows  
680 all replicates of non-transfected, SCR, PINK1 and PLK1 KD for 3 independent experiments.

681 **E.** Representative images of pUb(Ser65) following treatment of SCR and PINK1 KD POE SH-SY5Y cells  
682 with 10  $\mu\text{M}$  O/A for 3 h. Scale bar: 20  $\mu\text{m}$ .

683 **F.** Quantification of pUb(Ser65) in **E** (n=6, two-way ANOVA with Tukey's multiple comparisons test).

684 **G.** Representative analysis of integrated intensity of pUb(Ser65) and TOM20 for a single HCS plate.

685 **H.** pUb(Ser65) Z-scores of the two other replicate screen plates.

686 Data are shown as mean  $\pm$  SD.

687

688 **Extended Data Figure 2. KAT8 knockdown has no effect on cell viability.**

689 **A.** Representative images of nuclei following treatment of SCR, PINK1 and PLK1 siRNA KD POE SH-  
690 SY5Y cells with 10  $\mu\text{M}$  O/A for 3 h. Scale bar: 20  $\mu\text{m}$ .

691 **B.** Quantification of the number of nuclei in **A** (n=6, two-way ANOVA with Tukey's multiple  
692 comparisons test).

693 **C.** Z-scores of a representative screen plate showing that KAT8 or PINK1 siRNA KD don't affect cell  
694 viability, on the contrary to PLK-1 KD.

695 Data are shown as mean  $\pm$  SD.

696

697 **Extended Data Figure 3. KAT8 eQTLs colocalise with SNPs associated with PD risk**

698 The x-axis displays the physical position on chromosome 16 in megabases. The minus log p-values  
699 are plotted for every SNP present in both the PD GWAS (Chang *et al.*, 2017) and KAT8 eQTLs derived  
700 from the GTEx V7 caudate data. The p-values for the PD GWAS are plotted in yellow and p-values for  
701 KAT8 eQTLs are plotted in blue.

702

703 **Extended Data Figure 4. KAT8 knockdown decreases pUb(Ser65) levels.**

704 **A.** Representative images of pUb(Ser65) following treatment of SCR, PINK1 and KAT8 siRNA KD POE  
705 SH-SY5Y with 1  $\mu$ M O/A for 3 h. Insets show nuclear staining for the same fields. Scale bar: 20  $\mu$ m.

706 **B.** Quantification of pUb(Ser65) levels in A (n=3, two-way ANOVA with Dunnett's correction).

707 Data are shown as mean  $\pm$  SD.

708

709 **Extended Data Figure 5. Knockdown of the mitochondrial components of the NSL complex reduces**  
710 **pUb(Ser65) levels.**

711 Quantification of pUb(Ser65) following treatment of SCR, PINK1 or NSL components siRNA KD POE

712 SH-SY5Y cells with 1  $\mu$ M O/A for 3 h. Data are shown as mean  $\pm$  SD; n=6, one-way ANOVA with

713 Dunnett's correction.

714

715 **Extended Data Figure 6. KAT8 and KANSL1 knockdown reduce pUb(Ser65) levels in WT SHSY5Y and**  
716 **H4 cells.**

717 **A.** Representative images of pUb(Ser65) following treatment of SCR, PINK1 and KAT8 siRNA KD WT  
718 SH-SY5Y with 1  $\mu$ M O/A for 3 h. Insets show nuclear staining for the same fields. Scale bar: 20  $\mu$ m.

719 **B.** Quantification of pUb(Ser65) levels in A (n=6, two-way ANOVA with Dunnett's correction).

720 **C.** Representative IB of whole-cell lysates from SCR, PINK1, KANSL1 and KAT8 siRNA KD H4 cells  
721 treated with 1  $\mu$ M O/A for 3 h.

722 **D.** Quantification of pUb(Ser65) in D (n=3, one-way ANOVA with Dunnett's correction).

723 Data are shown as mean  $\pm$  SD.

724

725 **Extended Data Figure 7. Neuronal loss of *mof* or *ns1* causes locomotor deficit, shortened lifespan**  
726 **and neurodegeneration.**

727 **A, B.** Climbing ability of pan-neuronal (*nSyb-GAL4*) driven knockdown of *mof* (**A**) or *ns1* (**B**)

728 measured at the indicated age of adults, compared to control RNAi (A: Kruskal-Wallis test, with

729 Dunn's post-hoc multiple comparisons; B: Mann-Whitney test).

730 **C, D.** Lifespan of *mof* (**C**) or *ns1* (**D**) pan-neuronal knockdown (*nSyb-GAL4*) compared to control RNAi  
731 (Log-rank (Mantel-Cox) test).

732 **E, F.** Quantification of dopaminergic neurons (PPL1 cluster) after pan-neuronal or dopaminergic (DA)

733 neuron (*TH-GAL4*) driven depletion of *mof* (**E**), *ns1* (**F**), or control RNAi. Representative images of

734 PPL1 neurons (as bounded by the box) under depletion conditions are shown. Flies were aged 30

735 days, except for pan-neuronal *ns1* kd which are 16-days-old. Scale bar: 20  $\mu$ m; Mann-Whitney test.

736 For all tests, n numbers are indicated in the graphs; p<0.0001 = \*\*\*\*; p<0.001 = \*\*\*.

737



738 **Extended Data Figure 8. Overview of the PD GWAS genetic signal at the *MAPT* locus.**

739 **A.** *MAPT* primary GWAS signal.

740 **B.** *MAPT* conditional GWAS signal.

741

742 **Extended Data Figure 9. ASE sites in *MAPT* in LD with the H1/H2 SNP.**

743 ASEs derived from putamen and substantia nigra that are in LD with the H1/H2 tagging SNP,

744 rs12185268 and their position along the *MAPT* gene. The missense variants track displays the

745 variants annotated as missense by gnomAD v2.1.1 (Lek *et al.*, 2016). The valid track displays the

746 heterozygous sites (orange = missense) with an average read depth greater than 15 reads across all

747 samples, in LD with H1/H2, which were examined for ASE. The topmost track displays the  $-\log_{10}$

748 scale for the minimum FDR across samples for the sites that show an ASE in at least one sample.

749

750

751

752

753

754

755

756

757

758

**A**

| Gene    | 1 | 2 | 3 | 4 | 5 | 6 |
|---------|---|---|---|---|---|---|
| ATP13A2 |   |   |   | X | X | X |
| CCNT2   |   |   |   | X |   |   |
| CD38    | X | X |   | X |   |   |
| CTSB    | X | X | X |   |   |   |
| DDRGK1  |   |   |   | X |   |   |
| DGKQ    |   |   |   | X |   |   |
| DJ1     |   |   |   |   | X |   |
| DNAJC13 |   |   |   |   | X |   |
| FBXO7   |   |   |   |   | X |   |
| GALC    | X |   |   | X |   | X |
| GBA     |   |   | X |   | X | X |
| GPNMB   | X | X |   | X |   |   |
| HSD3B7  |   | X |   |   |   |   |
| IDUA    |   |   |   |   |   | X |
| INPP5F  |   |   | X |   |   |   |
| KAT8    |   | X | X | X |   |   |
| KLHL7   |   | X |   | X |   |   |
| LRRK2   |   |   | X | X | X |   |
| LSM7    | X | X |   | X |   |   |
| MAPT    |   |   | X | X |   |   |
| NCKIPSD | X | X | X | X |   |   |
| NEK1    | X |   |   |   |   |   |
| NSF     |   |   | X |   |   |   |
| NUCKS1  |   | X |   | X |   |   |
| NUPL2   | X | X |   | X |   |   |
| PDLIM2  |   | X |   | X |   |   |
| PM20D1  | X |   |   |   |   |   |
| PRKN    |   |   |   |   | X |   |
| RAB7L1  | X | X | X |   |   |   |
| SH3GL2  |   |   | X |   |   |   |
| SLC41A1 |   | X |   | X |   |   |
| SNCA    |   |   |   |   | X |   |
| SPPL2B  | X |   |   |   |   |   |
| STK39   |   |   |   | X |   |   |
| VAMP4   | X | X |   |   |   |   |
| VPS35   |   |   |   |   | X |   |
| WDR6    | X | X |   |   |   |   |
| ZNF646  |   |   |   | X |   |   |

**B**

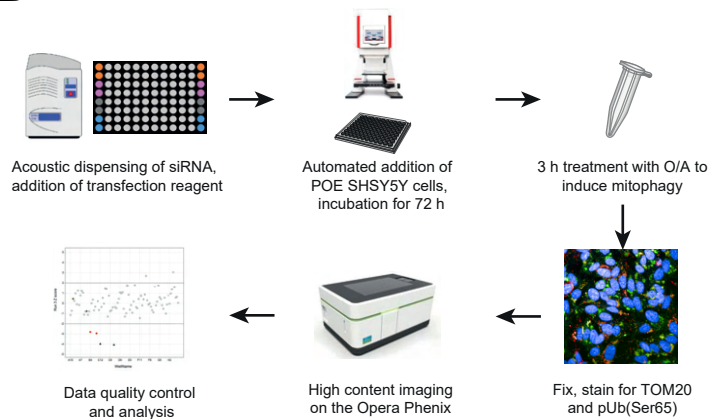

**C**

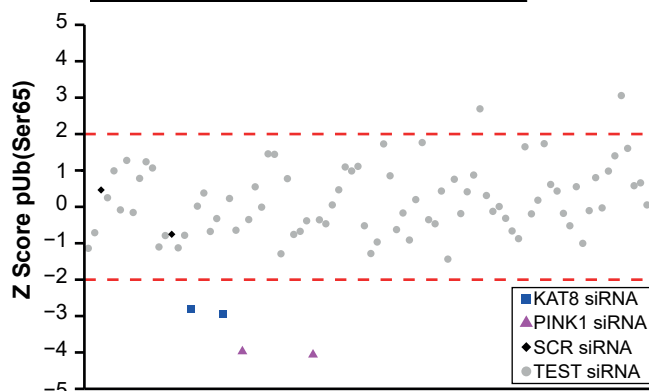

**D**

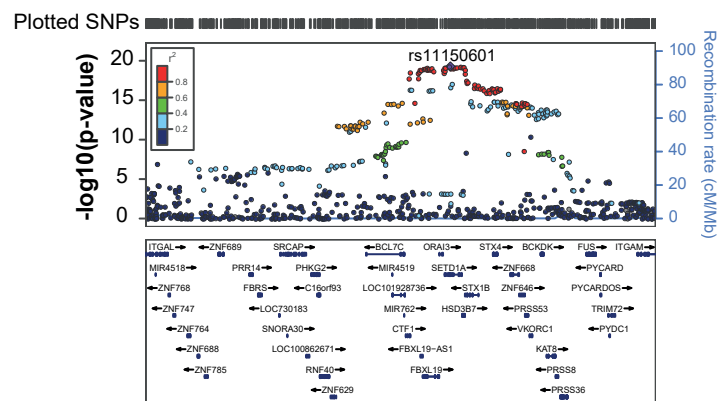

**E**

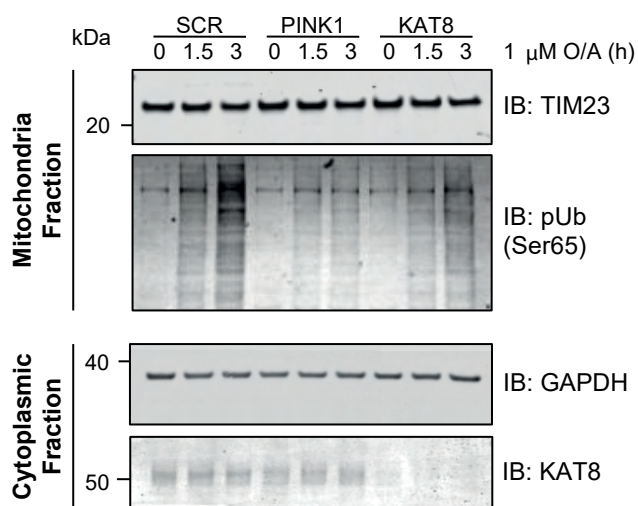

**F**

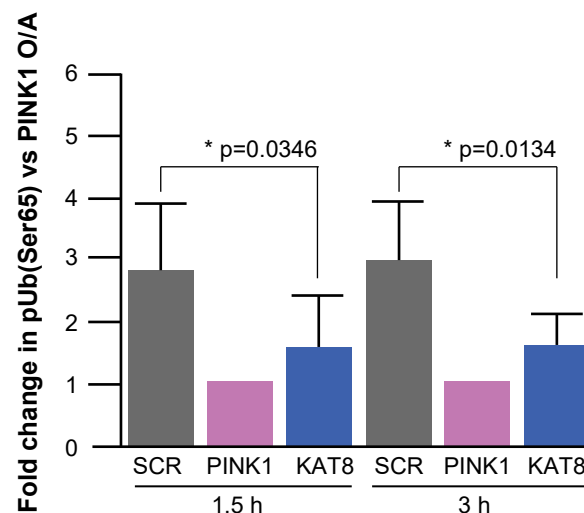

**G**

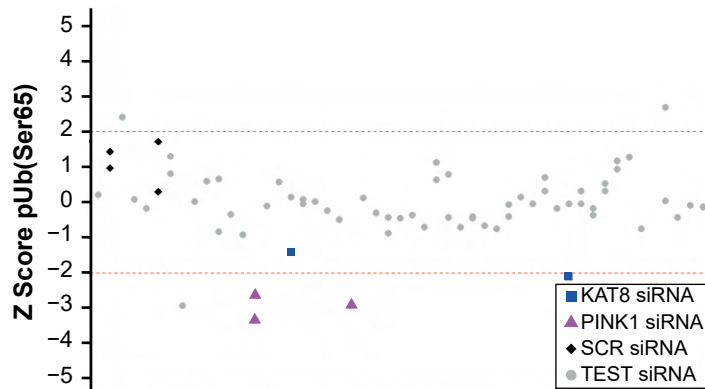

**Figure 1 - High content mitophagy screen of PD risk genes identifies KAT8 as a modulator of pUb(Ser65) levels.**

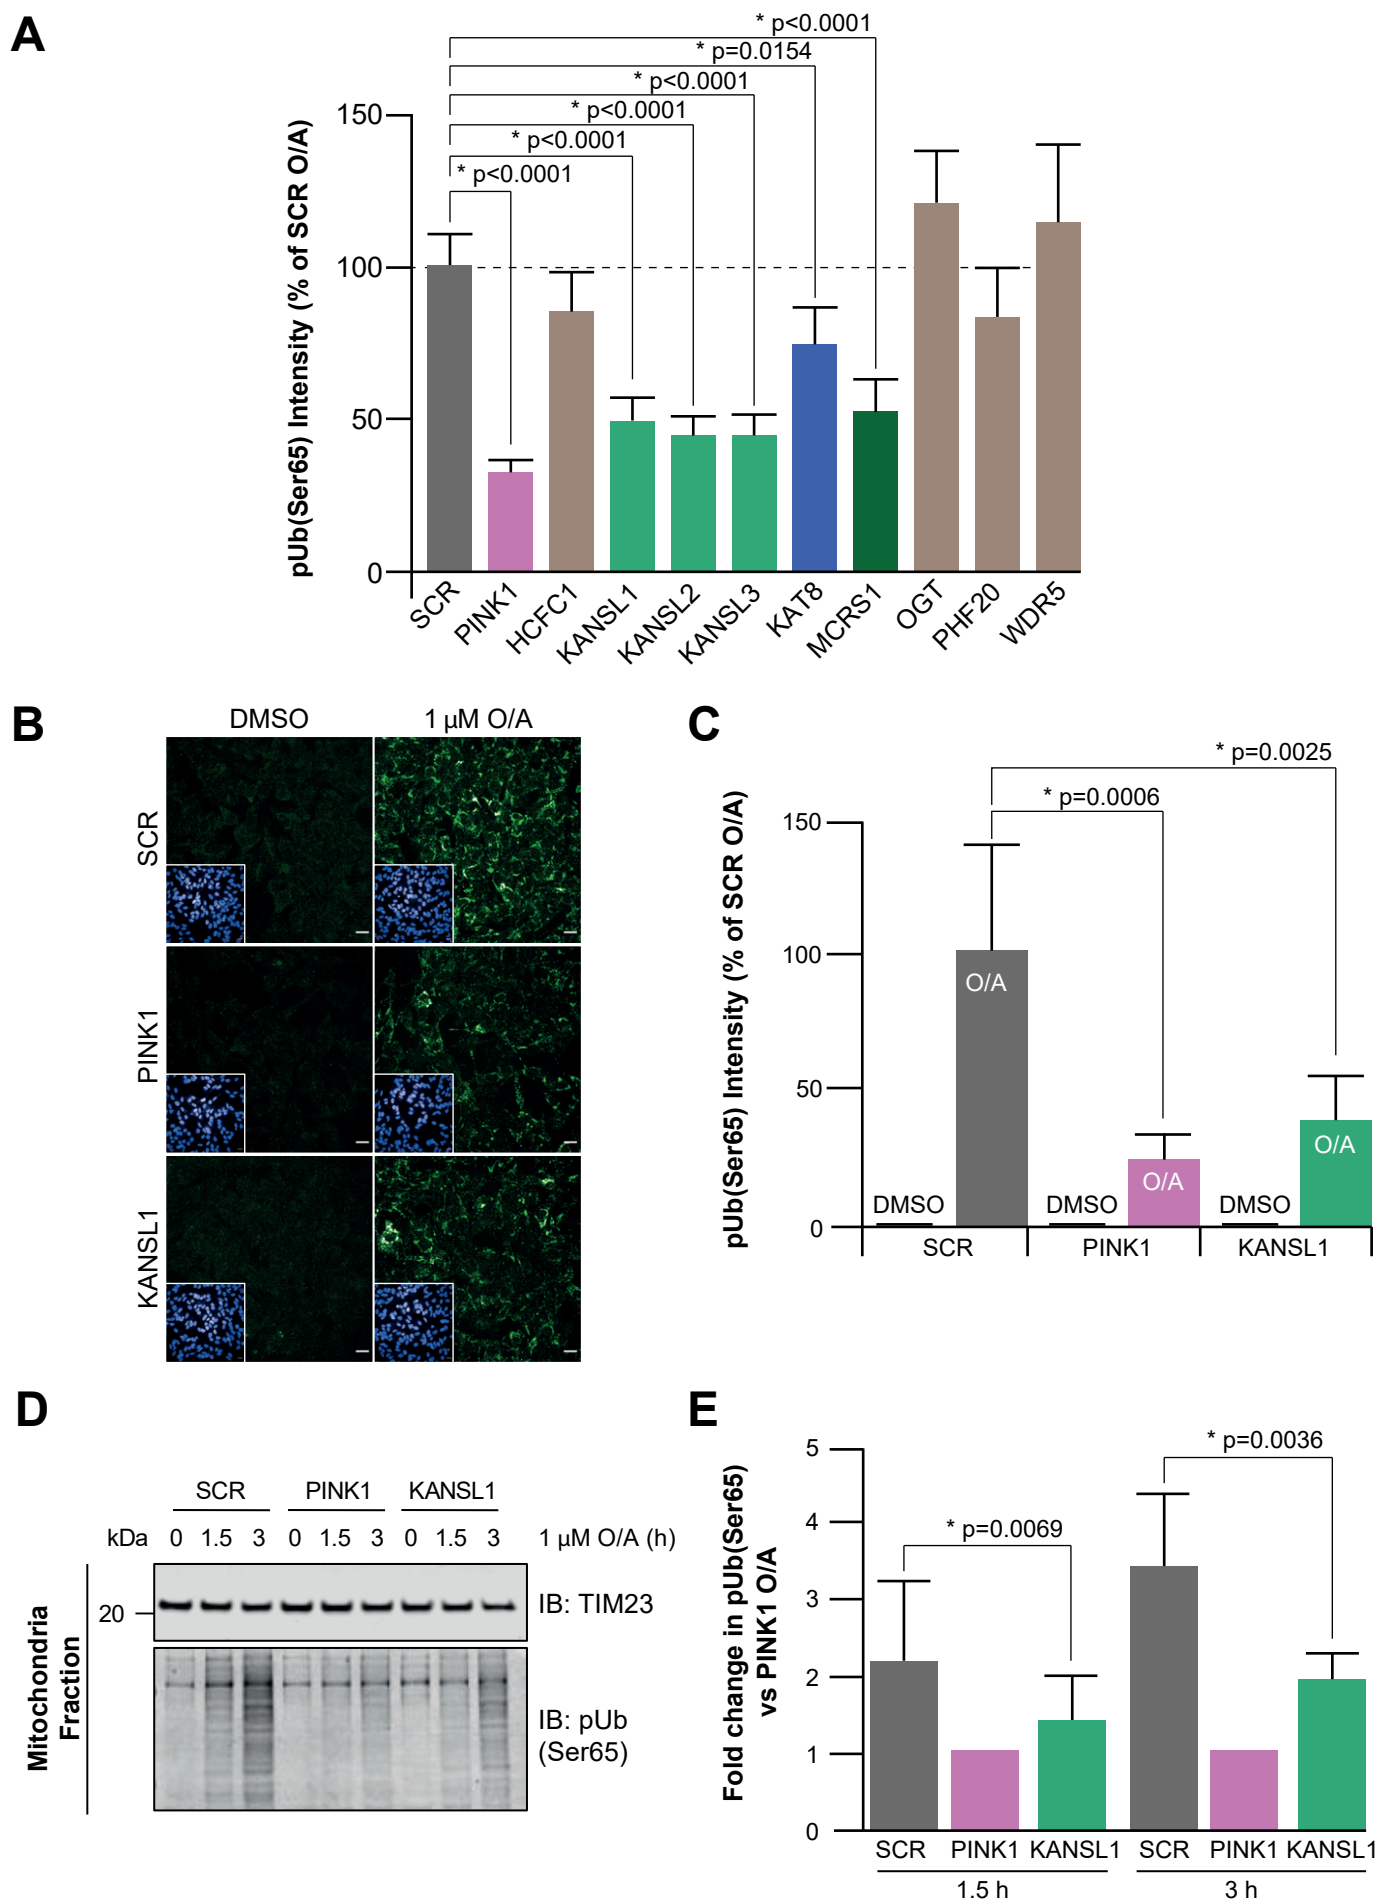

Figure 2 - KANSL1, another PD risk gene, also affects pUb(Ser65) levels

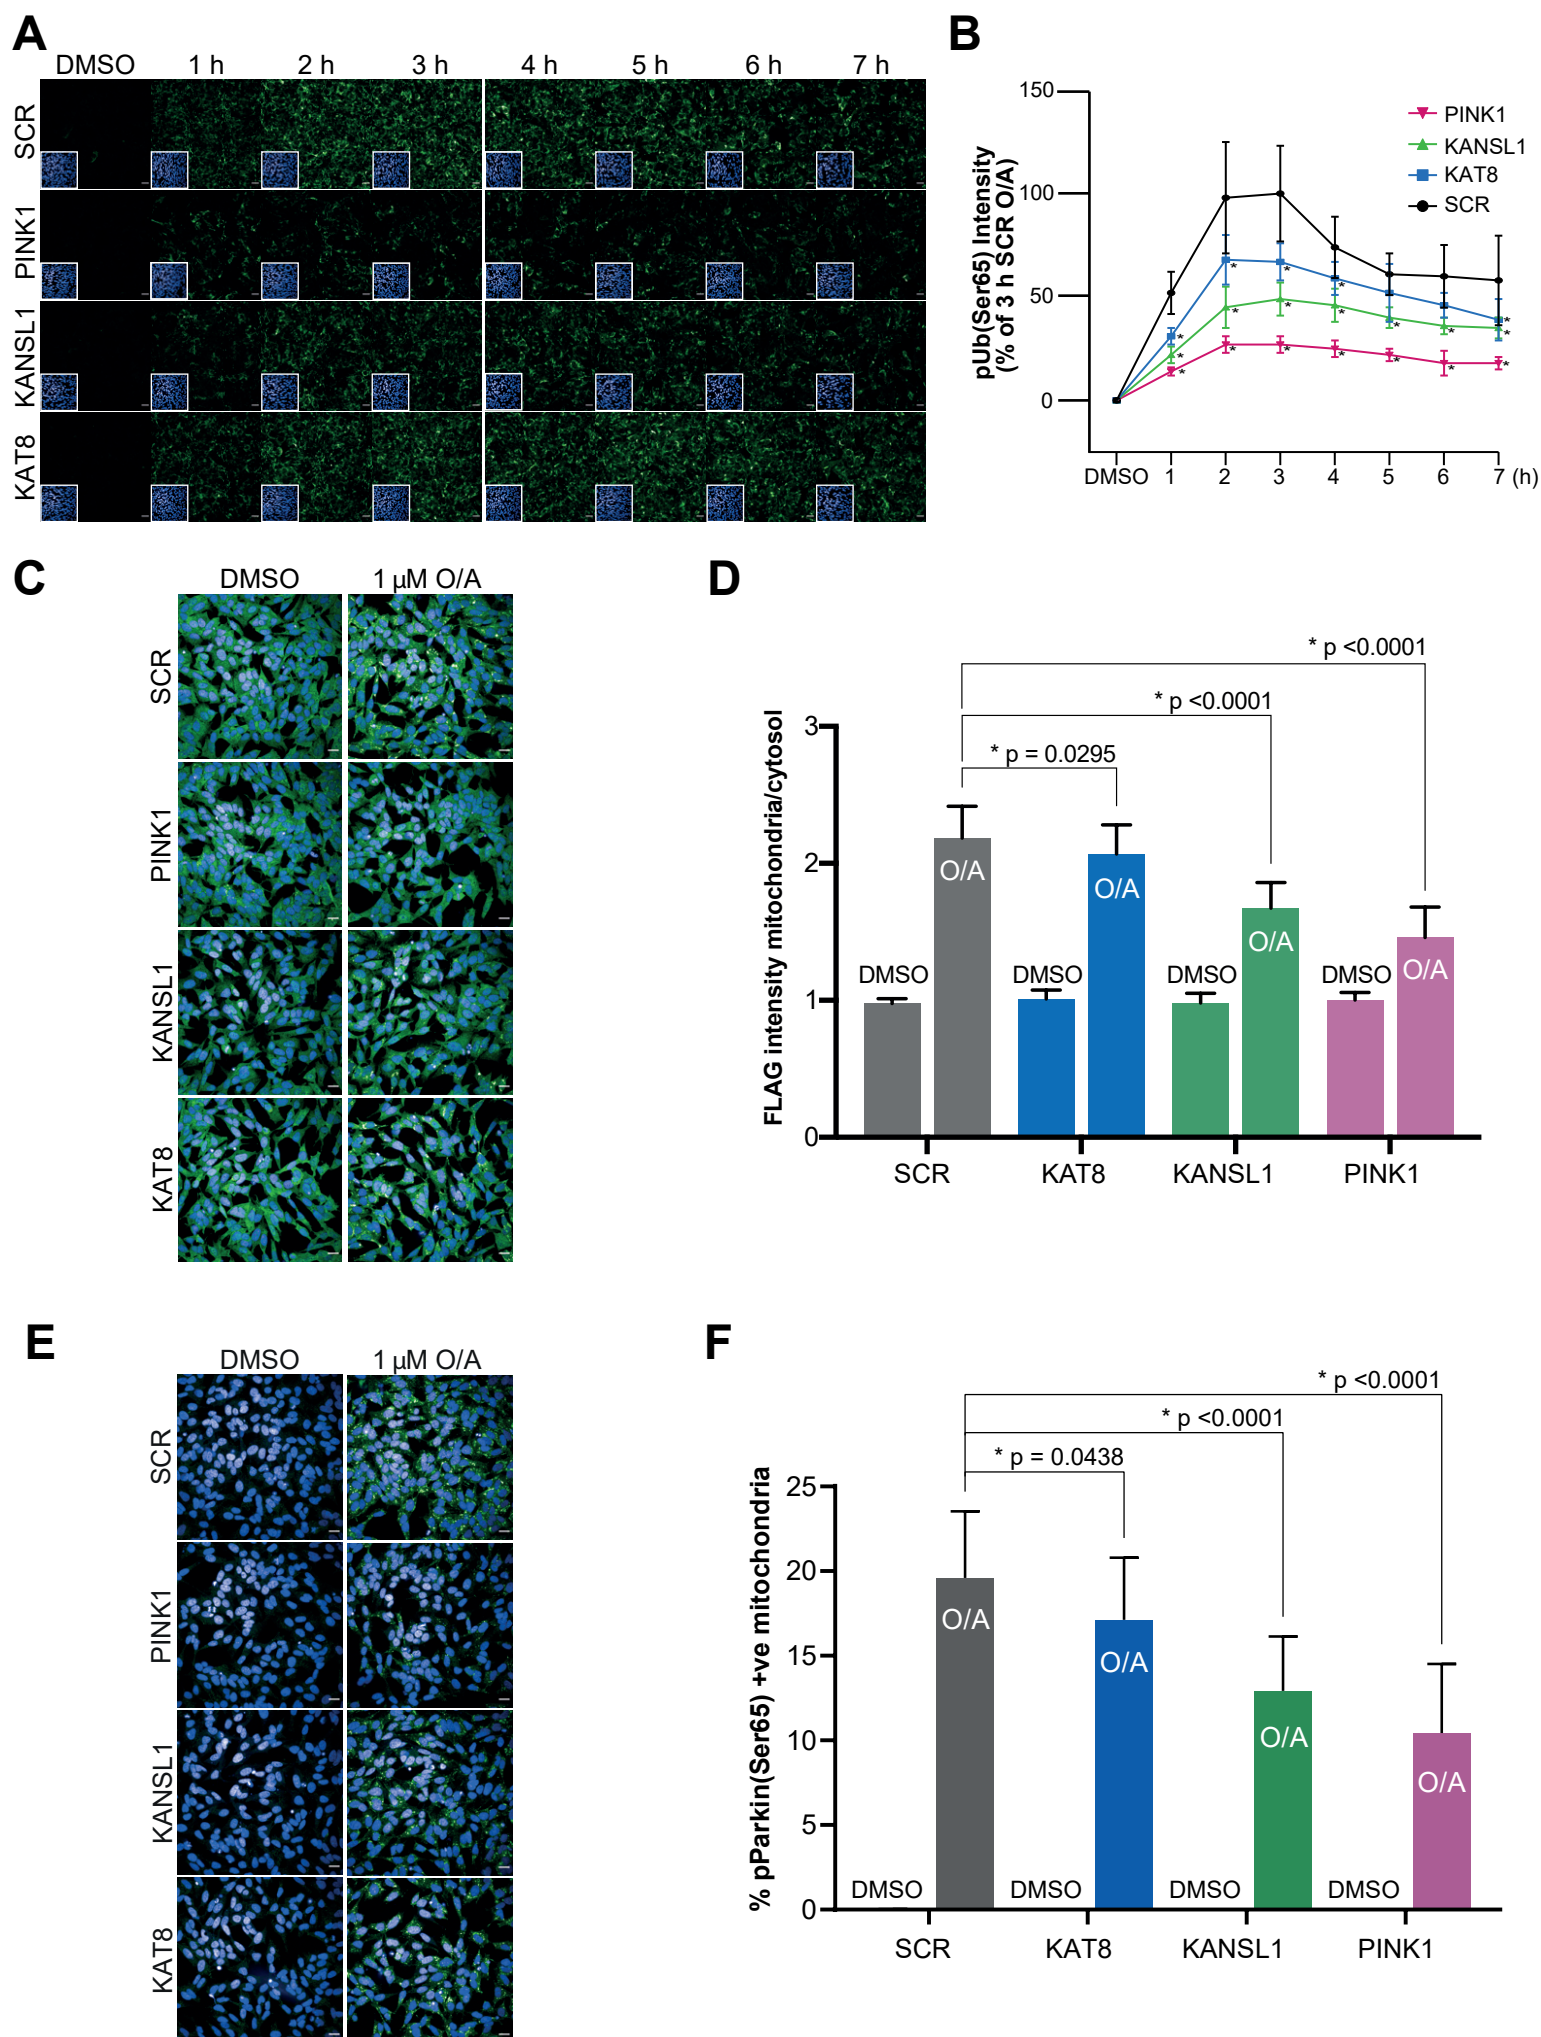

**Figure 3 - KANSL1 and KAT8 knockdowns reduce pUb(Ser65) levels, Parkin recruitment and Parkin and Parkin phosphorylation.**

**A**

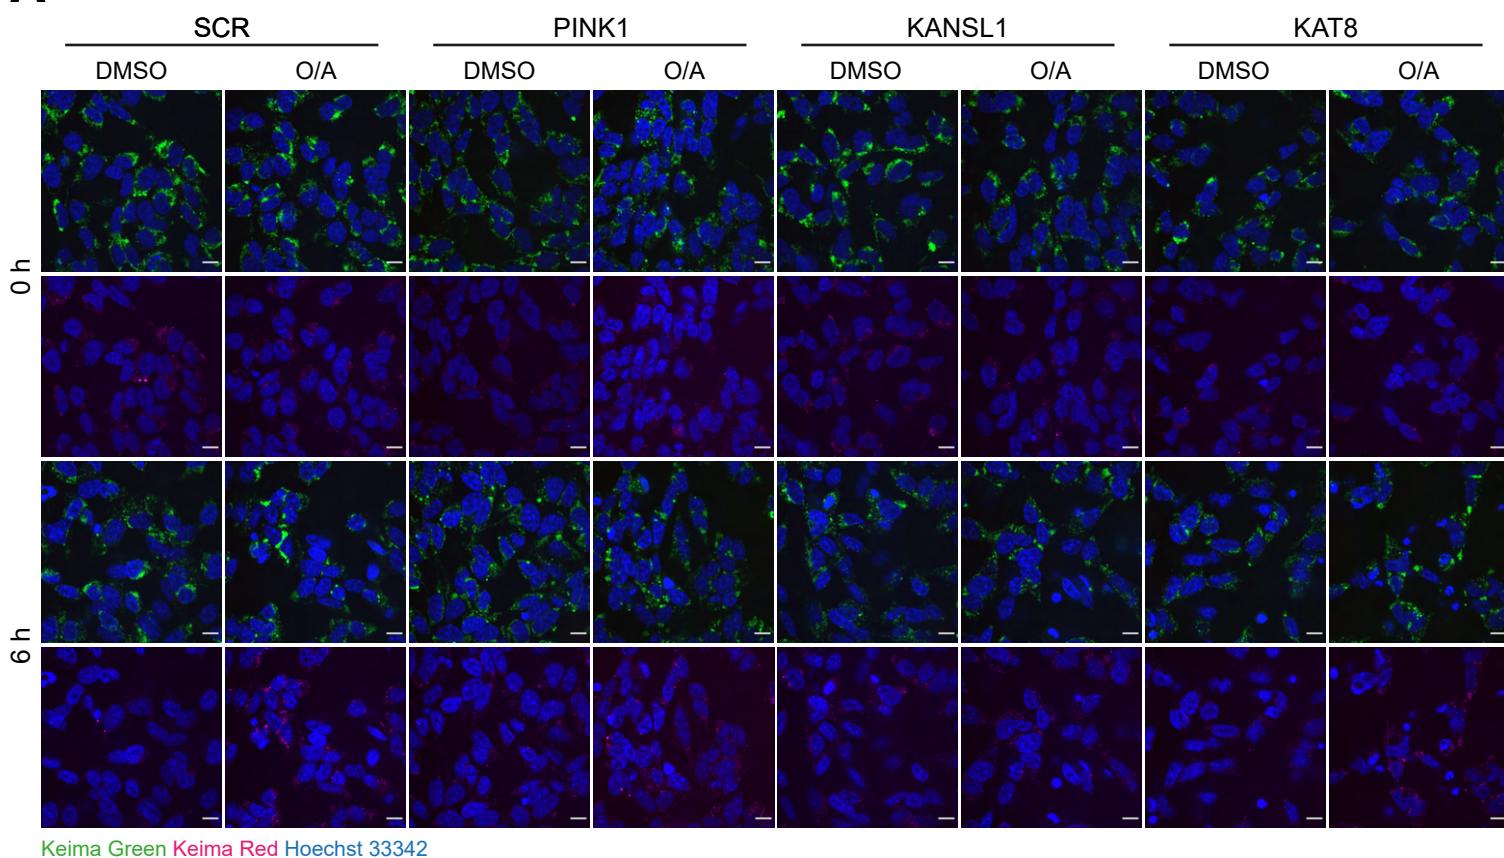

**B**

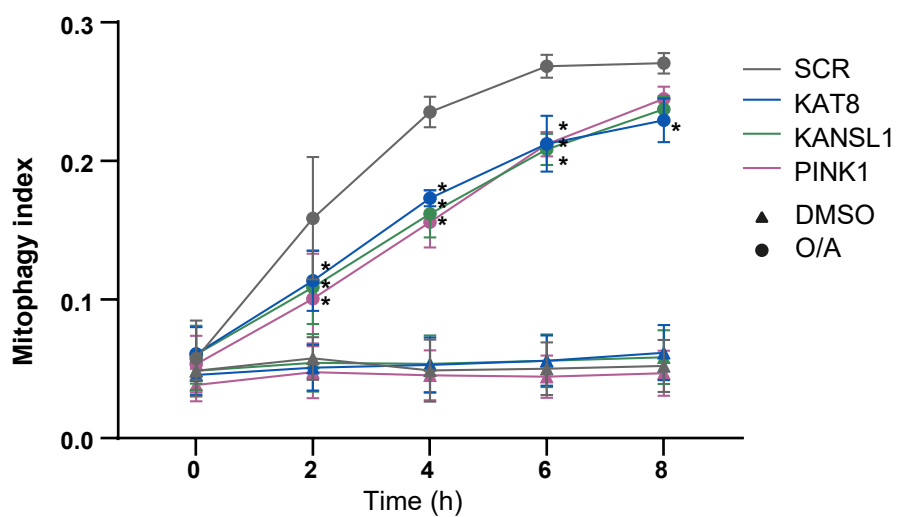

Figure 4 - KANSL1 and KAT8 knockdown decrease mitochondrial clearance.

**A**

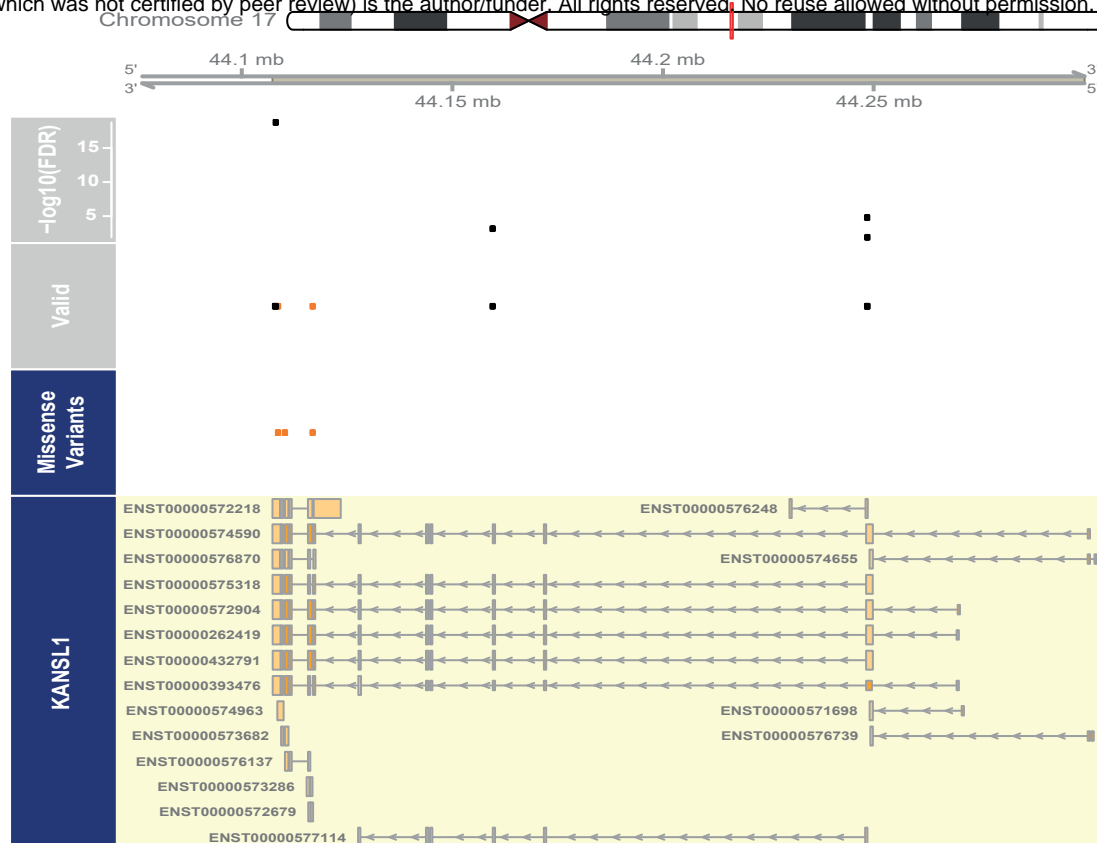

**B**

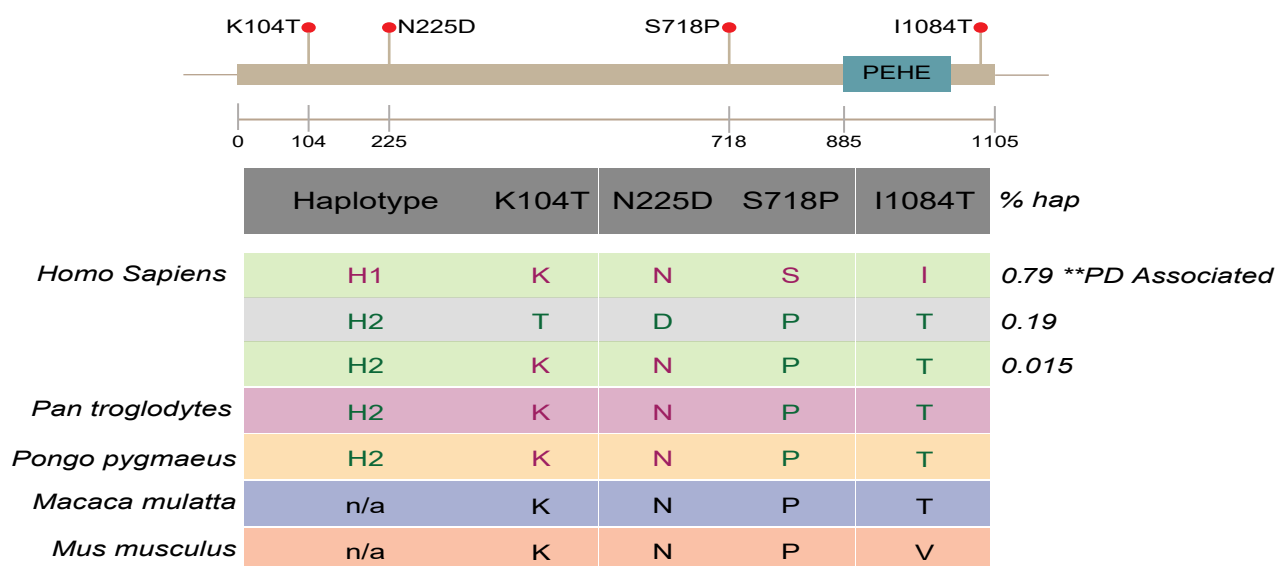

**C**

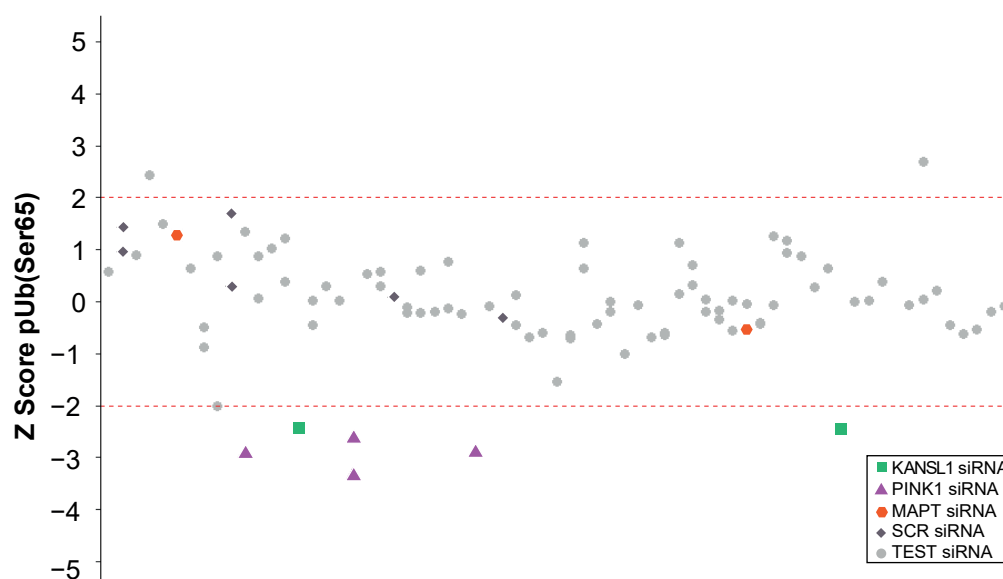

**Figure 5 - KANSL1, which presents ASE sites in LD with the H1/H2 SNP, is the only gene on the 17q21 locus modulating pUb(Ser65) levels**

**A**

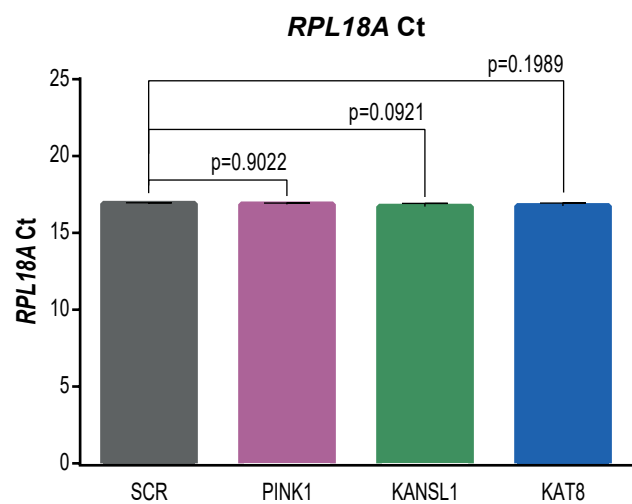

**B**

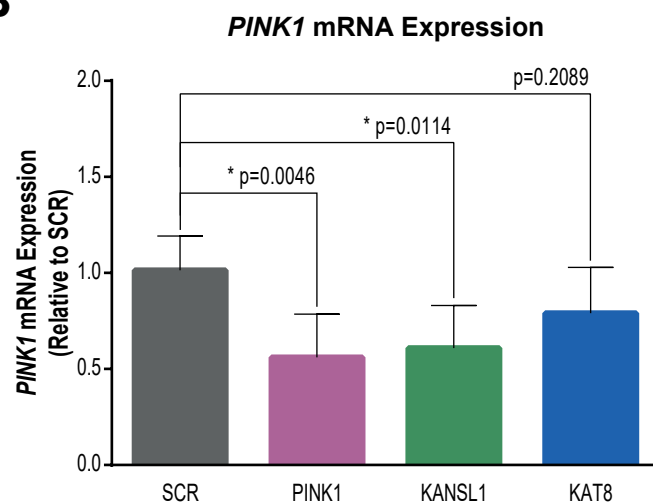

**C**

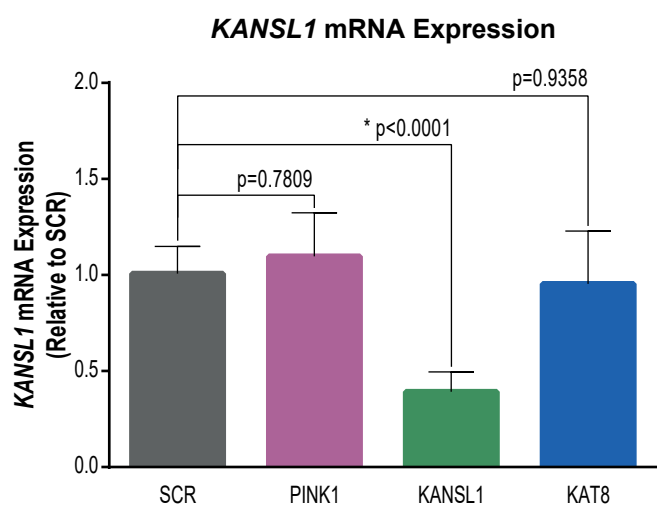

**D**

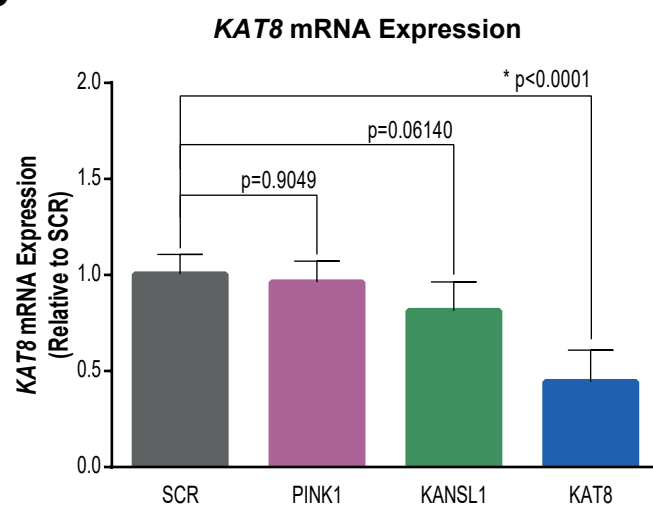

**Figure 6 - KANSL1 knockdown reduces *PINK1* mRNA in POE SHSY5Y cells**
