1 **TITLE**

2 Regulation of mitophagy by the NSL complex underlies genetic risk for Parkinson's disease at  
3 Chr16q11.2 and on the MAPT H1 allele

4

5

6 **AUTHOR INFORMATION**

7 Marc P.M. Soutar<sup>1,\*</sup>, Daniela Melandri<sup>1,\*</sup>, Emily Annuario<sup>1,\*</sup>, Amy E. Monaghan<sup>2,3</sup>, Natalie J. Welsh<sup>4</sup>,  
8 Karishma D'Sa<sup>1,5</sup>, Sebastian Guelfi<sup>1</sup>, David Zhang<sup>1</sup>, Alan Pittman<sup>6</sup>, Daniah Trabzuni<sup>1</sup>, Kylie S. Pan<sup>1</sup>,  
9 Demis A. Kia<sup>1</sup>, Magda Bictash<sup>2,3</sup>, Sonia Gandhi<sup>1,7</sup>, Henry Houlden<sup>1</sup>, Mark R. Cookson<sup>8</sup>, Nicholas W  
10 Wood<sup>1</sup>, Andrew B. Singleton<sup>8</sup>, John Hardy<sup>1,3</sup>, Paul J. Whiting<sup>2,3</sup>, Cornelis Blauwendraat<sup>8</sup>, Alexander J.  
11 Whitworth<sup>4</sup>, Claudia Manzoni<sup>1,9</sup>, Mina Ryten<sup>1,†</sup>, Patrick A. Lewis<sup>1,9,†</sup> & H  l  ne Plun-Favreau<sup>1,†,‡</sup>

12

13 <sup>1</sup> UCL Queen Square Institute of Neurology, London, UK

14 <sup>2</sup> UCL Alzheimer's Research UK, Drug Discovery Institute, London, UK

15 <sup>3</sup> UCL Dementia Research Institute, London, UK

16 <sup>4</sup> MRC Mitochondrial Biology Unit, University of Cambridge, Cambridge, UK

17 <sup>5</sup> KCL, London, SE1 1UL, UK

18 <sup>6</sup> St Georges University, London, UK

19 <sup>7</sup> Francis Crick Institute, London, UK

20 <sup>8</sup> Laboratory of Neurogenetics, National Institute on Aging, National Institutes of Health, Bethesda,  
21 MD, USA

22 <sup>9</sup> School of Pharmacy, University of Reading, Reading, UK

23

24 \* and † these authors contributed equally to the work

25 ‡ corresponding author

26

27 **RUNNING TITLE**

28 New mitophagy Parkinson's risk genes

29 **ABSTRACT**

30 Parkinson's disease (PD) is a common incurable neurodegenerative disease. The identification of  
31 genetic variants via genome-wide association studies (GWAS) has considerably advanced our  
32 understanding of the PD genetic risk. Understanding the functional significance of the risk loci is  
33 now a critical step towards translating these genetic advances into an enhanced biological  
34 understanding of the disease. Impaired mitophagy is a key causative pathway in familial PD, but its  
35 relevance to idiopathic PD is unclear. We used a mitophagy screening assay to evaluate the  
36 functional significance of risk genes identified through GWAS. We identified two new regulators of  
37 PINK1-mitophagy, KAT8 and KANSL1, previously shown to modulate lysine acetylation. These  
38 findings establish PINK1-mitophagy as a contributing factor to idiopathic PD. *KANSL1* is located  
39 on chromosome 17q21 where the risk associated gene has long been considered to be *MAPT*. Our  
40 data provide evidence that this assignment is likely to be incorrect and that variability  
41 at *KANSL1* underpins this association. Finally, these results enrich our understanding of physiological  
42 events regulating mitophagy and establish a novel pathway for drug targeting in neurodegeneration.

43

44 **KEY WORDS**

45 GWAS / *KANSL1* / KAT8 / mitophagy / Parkinson's disease

46

47

## 48 INTRODUCTION

49            Parkinson's disease (PD) is the most common movement disorder of old age and afflicts  
50 more than 125,000 in the UK<sup>1</sup>. Temporary symptomatic relief remains the cornerstone of current  
51 treatments, with no disease-modifying therapies yet available<sup>2</sup>. Until recently, the genetic basis for  
52 PD was limited to family-based linkage studies, favouring the identification of rare Mendelian genes  
53 of high penetrance and effect. However, genome-wide association studies (GWAS) have identified  
54 large numbers of common genetic variants linked to increased risk of developing the disease<sup>3,4</sup>.  
55 While these genetic discoveries have led to a rapid improvement in our understanding of the genetic  
56 architecture of PD<sup>5</sup>, they have resulted in two major challenges for the research community. First,  
57 conclusively identifying the causal gene(s) for a given risk locus, and secondly dissecting their  
58 contribution to disease pathogenesis. Addressing these challenges is critical for moving beyond  
59 genetic insights to developing new disease-modifying strategies for PD.

60            Previous functional analyses of *PINK1* and *PRKN*, two genes associated with autosomal  
61 recessive PD, have highlighted the selective degradation of damaged mitochondria (mitophagy) as a  
62 key contributor to disease pathogenesis. In mammalian cells, the mitochondrial kinase PINK1  
63 selectively accumulates at the surface of damaged mitochondria, where it phosphorylates ubiquitin,  
64 leading to the recruitment of the E3 ubiquitin ligase Parkin. The recruitment of autophagy receptors  
65 leads to the engulfment of damaged mitochondria in autophagosomes, and ultimately fusion with  
66 lysosomes<sup>6-11</sup>. It has subsequently become clear that other PD-associated Mendelian genes, such as  
67 *FBXO7*, *DJ-1* and *VPS35*<sup>12</sup>, are implicated in the regulation of PINK1-mediated mitochondrial quality  
68 control. Based upon these data, we hypothesised that PD-GWAS candidate genes may also be  
69 involved in this process, providing a mechanistic link between these genes and the aetiology of  
70 idiopathic PD. In order to test that hypothesis, we used functional genomics to prioritise candidate  
71 genes on the PD GWAS loci, and we developed a biological screening assay as a tool to identify genes  
72 that regulate PINK1-mitophagy, and as such, are very likely to be genes that increase the risk of  
73 developing PD.

74            In this study, we show that *KAT8* and *KANSL1*, two genes that were previously shown to be  
75 part of the same lysine acetylase complex partially located at the mitochondria<sup>13</sup>, are two new  
76 important regulators of PINK1-mediated mitochondrial quality control. These findings establish  
77 mitophagy as a contributing factor to idiopathic PD and provide a proof of principle for the value of  
78 screening approaches to identify causative genes in GWAS loci. Finally, these results suggest lysine  
79 acetylation as a potential new avenue for mitophagy modulation and therapeutic intervention.

80

## 81 RESULTS

82 Genomic analyses of PD have identified over 80 loci associated with an increased lifetime  
83 risk for disease. In contrast to Mendelian PD genes, however, the assignment of a causative gene to  
84 a risk locus is often challenging. In order to identify new risk genes for PD, we undertook a triage of  
85 PD GWAS candidate genes using a combination of methods: i) Colocalization (Coloc) and  
86 transcriptome-wide association analysis (TWAS)<sup>14</sup> using expression quantitative trait loci (eQTLs)  
87 information derived from Braineac<sup>15</sup>, GTEx and CommonMind resources<sup>16,17</sup> to link PD risk variants  
88 with specific genes, ii) weighted protein-protein interaction (PPI) network analysis (WPPINA)<sup>18</sup>  
89 based on Mendelian genes associated with PD, and iii) the prioritised gene set as described in PD-  
90 GWAS<sup>3,19</sup>. 31 open reading frames (ORFs) were nominated as putatively causal for associations at PD  
91 risk loci. 55% of these genes were prioritised through multiple techniques (Fig. 1a), with three out of  
92 31 genes (*KAT8*, *CTSB* and *NCKIPSD*) identified through all three prioritization methods (Fig. 1b, c).  
93 The 31 genes, together with 7 PD Mendelian genes and lysosomal storage disorder genes, previously  
94 shown to be enriched for rare, likely damaging variants in PD<sup>20</sup>, were then taken forward for  
95 functional analysis (Supplementary Table 1).

96 Based upon extensive data implicating impaired mitophagy in the aetiology of familial PD<sup>7</sup>,  
97 we hypothesized that additional PD-GWAS candidate genes, involved in the most common,  
98 idiopathic form of the disease, may play a role in this process. In order to test whether the 38  
99 prioritised genes have a role in PINK1-mitophagy, we developed and optimized a high content  
100 screening (HCS) assay for phosphorylation of ubiquitin at serine 65 (pUb(Ser65)), a PINK1-dependent  
101 mitophagy marker<sup>21</sup>, following mitochondrial depolarization (Extended Data Fig. 1a and 2). The 38  
102 prioritised genes were individually knocked down (KD) using siRNA in Parkin over-expressing (POE)-  
103 SHSY5Y human neuroblastoma cells. Increased mitochondrial clearance following mitochondrial  
104 depolarization induced by treatment with 10  $\mu$ M of oligomycin/antimycin A (O/A) was validated as  
105 an endpoint for mitophagy (Extended Data Fig. 1b). Over 97% of the pUb(Ser65) signal colocalised  
106 with the TOM20 mitochondrial marker in O/A treated cells (Extended Data Fig. 1c, d). siRNA KD  
107 efficiency was validated using both a pool of *PINK1* siRNA, which decreased O/A induced pUb(Ser65)  
108 and subsequent TOM20 degradation (Extended Data Fig. 1e-g) without decreasing cell viability  
109 (Extended Data Fig. 3a, b), and a pool of Polo-like kinase 1 (PLK-1) siRNA that decreased cell viability  
110 by apoptosis (Extended Data Fig. 3a, b). The siRNA pools for the 38 candidate genes, together with  
111 controls, were screened in duplicate on each plate, across three replicate plates per run. Hits were  
112 identified as those wells where O/A-induced pUb(Ser65) was decreased or increased at greater than  
113 two standard deviations from the mean of the scramble (SCR) negative control siRNA.

114 *KAT8* was selected based on reproducible downregulation of O/A-induced PINK1-dependent  
115 pUb(Ser65) across all three replicates (Fig. 2a and Extended Data Fig. 1h), without affecting cell

116 viability (Extended Data Fig. 3c). Notably, *KAT8* was selected as a candidate gene on the basis of all  
117 three prioritization criteria – namely, proximity of the lead SNP to an ORF, colocalization of a brain-  
118 derived eQTL signal with a PD GWAS association signal (Extended Data Fig. 4) and evidence of PPI  
119 with a known PD gene (Fig. 1). Furthermore, we find that colocalization and Transcriptome-wide  
120 Association Study (TWAS)<sup>22</sup> analyses at this locus are consistent with the KD models in the HCS assay  
121 (Supplementary Tables 2 and 3)<sup>17</sup>. Both methods predict that the risk allele operates by reducing  
122 *KAT8* expression in PD cases versus controls. The effect of *KAT8* KD on pUb(Ser65) was further  
123 validated in POE SHSY5Y cells treated with either 1 or 10  $\mu$ M O/A, using both immunofluorescence  
124 (IF) and immunoblotting (IB) (Fig. 3a-d and Extended Data Fig. 5a-e). In order to assess whether  
125 other lysine acetyltransferases (KATs) could regulate PINK1-dependent mitophagy, the pUb(Ser65)  
126 screen was repeated in POE SHSY5Y cells silenced for 22 other KATs<sup>23,24</sup>. Only *KAT8* KD led to a  
127 decreased pUb(Ser65) signal, emphasising the specificity of the *KAT8* KD effect on pUb(Ser65) (Fig.  
128 3e and Supplementary Table 4).

129         These functional data complement and support the Omic prioritization of *KAT8* as a  
130 causative gene candidate for the chromosome 16q11.2 PD associated locus (Fig. 2b). To gain further  
131 insight into a possible role for *KAT8* in the aetiology of PD, we explored the known functional  
132 interactions of this protein. *KAT8* has previously been shown to partially localise to mitochondria as  
133 part of the NSL complex together with *KANSL1*, *KANSL2*, *KANSL3*, and *MCRS1*<sup>13</sup> (Fig. 4a). To test  
134 whether other components of the NSL complex also modulate mitophagy, the pUb(Ser65) screen  
135 was repeated in POE SHSY5Y cells silenced for each of the nine NSL components (*HCFC1*, *KANSL1*,  
136 *KANSL2*, *KANSL3*, *KAT8*, *MCRS1*, *OGT*, *PHF20*, *WDR5*) (Fig. 4a). Notably, reduction of *KANSL1*,  
137 *KANSL2*, *KANSL3*, *MCRS1* and *KAT8* expression led to decreased pUb(Ser65) after 1.5 or 3 h O/A  
138 treatment (Fig. 4b,c). Strikingly, *KANSL1* is another PD GWAS candidate gene<sup>3</sup>. The effect of *KANSL1*  
139 KD on pUb(Ser65) was further validated in POE SHSY5Y cells treated with 1  $\mu$ M O/A, using both IF  
140 and IB (Fig. 5a-d). A time course experiment was designed to compare the effect of *KAT8* and  
141 *KANSL1* KD on PINK1-dependent pUb(Ser65) (Fig. 6a,b and Supplementary table 5) and subsequent  
142 mitophagy (Fig. 7a,b). While individual KD of either *KANSL1* or *KAT8* affect phosphorylation of  
143 ubiquitin, *KANSL1* KD decreased pUb(Ser65) and mitophagy, as assessed by measuring the puncta of  
144 the mitochondrial marker PMPCB<sup>25</sup>, more efficiently than *KAT8* KD (Fig. 6a,b and Fig. 7a,b). To  
145 assess the role of *KAT8*/*KANSL1* in neuronal function and survival *in vivo*, we used *Drosophila* as a  
146 simple model system. Notably, the NSL complex was originally discovered in *Drosophila* through the  
147 homologs of *KAT8* and *KANSL1* (*mof* and *ns1*, respectively), but null mutants for these genes are  
148 associated with developmental lethal owing to profound transcriptional remodelling during  
149 development<sup>26</sup>. Therefore, we utilised inducible transgenic RNAi strains to target the KD of *mof* and

150 *ns1* specifically in neuronal tissues. Using behavioural assays as a sensitive readout of neuronal  
151 function we found that pan-neuronal KD of *mof* or *ns1* caused progressive loss of motor (climbing)  
152 ability (Extended data Fig. 6a, b), and also significantly shortened lifespan (Extended data Fig. 6c, d).  
153 Interestingly, loss of *ns1* had a notably stronger effect than loss of *mof*. Consistent with this, KD of  
154 *ns1* but not *mof*, in either all neurons or only in dopaminergic (DA) neurons, caused the loss of DA  
155 neurons (Extended data Fig. 6e, f).

156 *KANSL1* is located within the extensively studied inversion polymorphism on chromosome  
157 17q21 (Extended data Fig. 7a, b), which also contains *MAPT* - a gene frequently postulated to drive  
158 PD risk at this locus<sup>27</sup>. While the majority of individuals inherit this region in the direct orientation,  
159 up to 25% of individuals of European descent have a ~1mb sequence in the opposite orientation  
160<sup>28,29</sup>, inducing a larger ~1.3–1.6 Mb region of linkage disequilibrium (LD). Since this inversion  
161 polymorphism precludes recombination over a region of ~1.3–1.6 Mb, haplotype-specific  
162 polymorphisms have arisen resulting in the generation of two major haplotype clades, termed H1  
163 (common haplotype) and H2 (inversion carriers), previously strongly linked to neurodegenerative  
164 disease<sup>30,31</sup>. Due to high LD, the genetics of this region have been hard to dissect, and robust eQTL  
165 analyses have been challenging due to the issue of polymorphisms within probe sequences in  
166 microarray-based analyses or mapping biases in RNA-seq-based analyses. Several variants  
167 (rs34579536, rs35833914 and rs34043286) are in high LD with the H1/H2 haplotype and are located  
168 within *KANSL1* (Fig. 8a,b), which could directly impact on *KANSL1* protein function. In particular, one  
169 of the missense variants is a serine to proline change in *KANSL1* protein sequence (S718P), and  
170 would therefore be predicted to alter the gross secondary structure of the *KANSL1* protein (Fig. 8b).  
171 Furthermore, we used allele-specific expression (ASE) analysis to explore the possibility that PD risk  
172 might be mediated at this locus through an effect on *KANSL1* expression. Using RNA sequencing data  
173 generated from 84 brain samples (substantia nigra n=35; putamen n=49), for which we had access to  
174 whole exome sequencing and SNP genotyping data thus enabling mapping to personalised genomes  
175<sup>32</sup>, we quantified the variation in expression between the H1 and H2 haplotypes (Supplementary  
176 Table 6). While we identified ASE sites within *MAPT* (Extended Data Fig. 8 and Supplementary Table  
177 7), we also identified 4 sites of allele-specific expression in *KANSL1* (Fig. 8a), suggesting that the high  
178 PD risk H1 allele is associated with lower *KANSL1* expression, consistent with our functional  
179 assessment. Interestingly, sequence analysis of the human *KANSL1* haplotype revealed that the high  
180 risk H1 haplotype is the more recent “mutant” specific to *Homo sapiens*, and that other primates  
181 and mammals share the rarer non-risk ancestral H2 haplotype (Figure 8b).

182 To assess the specificity of the *KANSL1* KD effect on PINK1-mitophagy, 32 open reading  
183 frames in linkage disequilibrium on the H1 haplotype at the 17q21 locus (Extended data Fig. 7a, b

184 and Supplementary Table 8) were knocked down individually and their effect on pUb(Ser65) was  
185 assessed. While the effect of *KANSL1* KD on pUb(Ser65) was confirmed, neither the KD of *MAPT*, nor  
186 the KD of each of the other 30 genes on this locus, led to a decreased in the pUb(Ser65) signal (Fig.  
187 9). These data confirm the selectivity of our mitophagy screening assay and suggest that *KANSL1* is  
188 likely to be a key PD risk gene at the 17q21 locus.

189

## 190 **DISCUSSION**

191 Since the first PD GWAS study was performed in 2006<sup>33</sup> GWAS have identified about 90  
192 independent loci for PD<sup>4</sup>. However, translating GWAS findings into a new molecular understanding of PD-  
193 associated pathways and new therapeutic targets has remained a major challenge for the scientific  
194 community. In order to screen for PD GWAS candidate genes that play a role in PINK1-mitophagy, and thus  
195 are likely to be genuine risk genes for PD, we have set up and optimised a HCS for pUb(Ser65), a marker of  
196 PINK1-dependent mitophagy, a key pathway in PD pathogenesis. This approach allowed the successful  
197 identification of two new genes associated with increased PD risk, that play a role in mitophagy.  
198 Interestingly, these two genes were previously shown to be part of the same complex, the NSL complex.

199 This study demonstrates the substantial potential of functional screens to exploit genetic data by  
200 providing orthogonal information that can confidently identify new risk genes. This is particularly  
201 important in genomic regions with uniformly high linkage disequilibrium, such as the 17q21 inversion  
202 region which includes 32 ORFs of which many are highly expressed in brain and where existing fine-  
203 mapping and functional genomic analyses have been inconclusive. Interestingly, while *MAPT* has long been  
204 considered the risk associated gene at this locus, this has recently been questioned by Dong and  
205 colleagues, who also raised the significance of *KANSL1* in driving PD risk at the locus<sup>34</sup>. Furthermore,  
206 functional screening can simultaneously provide mechanistic insights as exemplified in this case by the  
207 novel insights we provide into the molecular events regulating mitochondrial quality control and which  
208 support a role for mitophagy as a contributing factor to sporadic PD. While our data demonstrate an  
209 unequivocal role for *KAT8* and *KANSL1* in PINK1-dependent ubiquitin phosphorylation and subsequent  
210 mitophagy, the precise mechanism of regulation remains to be determined. Our results identify *KAT8* and  
211 *KANSL1* as modifiers of PINK1-dependent pUb(Ser65), suggesting that they may be regulating PINK1 kinase  
212 activity. It will be important to determine whether phosphorylation of other PINK1 substrates, such as  
213 Parkin and Rab8A<sup>9,35</sup>, are modulated by *KAT8* and *KANSL1*. The *KAT8* and *KANSL1*-containing NSL complex  
214 functions to promote histone acetylation and as such, is a master regulator of transcription<sup>36</sup>. Therefore,  
215 another possibility is that *KAT8/KANSL1* may regulate PINK1 transcription, and subsequent translation.  
216 Interestingly, depletion of *KAT8/KANSL1* was shown to cause significant downregulation of mitochondrial  
217 DNA transcription and translation, and ultimately impaired mitochondrial respiration<sup>13</sup>. Thus, it is also

218 possible that KAT8/KANSL1-dependent modulation of mitochondrial DNA indirectly regulates PINK1  
219 mitochondrial accumulation and subsequent mitophagy. Finally, an intriguing possibility is that the  
220 KAT8/KANSL1 complex directly acetylates ubiquitin, which has previously been shown to be acetylated on  
221 six out of its seven lysines (K6, K11, K27, K33, K48, K63)<sup>37</sup>. It has been proposed that the KAT8/KANSL1  
222 complex has targets in the mitochondria other than the mitochondrial DNA<sup>13</sup>. Further experiments are  
223 required to determine whether KAT8, which has been shown to partially localise at the mitochondrial  
224 outer membrane, where ubiquitin is phosphorylated<sup>13</sup>, may contribute to ubiquitin acetylation.

225         Important genetic discoveries in PD, in particular, the identification of the *PINK1*<sup>38</sup> and *PRKN* genes  
226<sup>39</sup>, opened the field of selective mitophagy<sup>7</sup>. However, there is still a clear need for a better molecular  
227 understanding of mitochondrial quality control. Here we provide new insights into the mechanism by  
228 identifying two new molecular players, KAT8 and KANSL1. These new regulators of mitophagy provide the  
229 first direct evidence for a role of the PINK1-mitophagy pathway in idiopathic PD and the convergence  
230 between familial and idiopathic pathways in disease. Taken together, these findings open a novel avenue  
231 for the therapeutic modulation of mitophagy in PD, with potential implications across drug discovery in  
232 frontotemporal dementia and Alzheimer's disease, where mitophagy also plays an important role in  
233 disease pathogenesis<sup>40</sup>.

234



235 **METHODS**

236

237 **Reagents**

238 Oligomycin (mitochondrial complex V inhibitor) was purchased from Cayman Chemicals (11341) and  
239 from Sigma-Aldrich (O4876), and antimycin A (mitochondrial complex III inhibitor) was purchased  
240 from Sigma-Aldrich (A8674). All siRNAs were purchased as pre-designed siGENOME SMARTpools  
241 from Dharmacon: non-targeting (D-001206-13), PINK1 (M-004030-02), PLK1 (L-003290-00), KIF-11  
242 (L-003317-00), KAT8 (M-014800-00), KANSL1 (M-031748-00), KANSL2 (M-020816-01), KANSL3 (M-  
243 016928-01), HCFC1 (M-019953-01), MCRS1 (M-018557-00), OGT (M-019111-00), PHF20 (M-015234-  
244 02), WDR5 (M-013383-01). The following antibodies were used for immunocytochemistry: mouse  
245 anti TOM20 (Santa Cruz, sc-17764, 1:1000), rabbit anti phospho-ubiquitin (Ser65) (Cell Signaling,  
246 37642, 1:1000), rabbit anti PMPCB (Proteintech 16064-1-AP, 1:1000), AlexaFluor 488 goat anti rabbit  
247 (Invitrogen, A11008, 1:2000), AlexaFluor 568 goat anti mouse (Invitrogen, A11004, 1:2000). The  
248 following antibodies were used for immunoblotting: mouse anti TIM23 (BD Biosciences, 611223,  
249 1:1000), rabbit anti phospho-ubiquitin (Ser65) (Merck Millipore, ABS1513-I, 1:1000), mouse anti  
250 GAPDH (Abcam, ab110305, 1:1000), rabbit anti KAT8 (Abcam, ab200600, 1:1000), IRDye 680LT  
251 donkey anti mouse (LI-COR Biosciences, 925-68022, 1:20000), IRDye 800CW donkey anti rabbit (LI-  
252 COR Biosciences, 925-32213, 1:20000).

253

254 **Selection of genes for High Content Screening**

255 Candidates for High Content Screening were selected based on i) WPPINA; ii) complex prioritization;  
256 and, iii) coloc analysis. WPPINA analysis is reported in <sup>18</sup> where the 2014 PD GWAS <sup>19</sup> was analysed;  
257 candidate genes were selected among those prioritised and with an LD  $r^2 \geq 0.8$ . The same pipeline  
258 has then been additionally applied to the 2017 PD GWAS <sup>3</sup> to update the list of candidate genes.  
259 Briefly, a protein-protein interaction network has been created based on the Mendelian genes for  
260 PD (seeds) using data from databases within the IMEx consortium. The network has been  
261 topologically analysed to extract the core network (i.e. the most interconnected part of the  
262 network). The core network contains the proteins/genes that can connect >60% of the initial seeds  
263 and are therefore considered relevant for sustaining communal processes and pathways, shared by  
264 the seeds. These processes have been evaluated by Gene Ontology Biological Processes enrichment  
265 analysis. The top SNPs of the 2017 PD GWAS have been used to extract open reading frames (ORFs)  
266 in cis-haplotypes defined by LD  $r^2 \geq 0.8$  (analysis performed in October 2017) <sup>3</sup>. These ORFs have  
267 been matched to the core network to identify overlapping proteins/genes in relevant/shared  
268 pathways. Results of complex prioritization (neurocentric prioritization strategy) were gathered from

269 <sup>3</sup> where this strategy was applied to the 2017 PD GWAS <sup>3</sup>. The coloc analysis was performed as  
270 reported in <sup>17</sup>, posterior probabilities for the hypothesis that both traits, the regulation of expression  
271 of a given gene and the risk for PD share a causal variant (PPH4), were calculated for each gene, and  
272 genes with PPH4  $\geq 0.75$  were considered to have strong evidence for colocalization. Summary  
273 statistics were obtained from the most recent PD GWAS <sup>4</sup> and were used for regional association  
274 plotting using LocusZoom <sup>41</sup>.

275

## 276 **Cell Culture and siRNA transfection**

277 POE SH-SY5Y cells are a kind gift from H. Ardley <sup>42</sup>. Cells were cultured in Dulbecco's Modified Eagle  
278 (DMEM, Gibco, 11995-065) and supplemented with 10% heat-inactivated foetal bovine serum (FBS,  
279 Gibco) in a humidified chamber at 37 °C with 5% CO<sub>2</sub>. For siRNA transfection, cells were transfected  
280 using DharmaFECT1 transfection reagent (Dharmacon, T-2001-03) according to the manufacturer's  
281 instructions (for concentrations of siRNA, see sections below).

282

## 283 **ASEs**

284 Sites of ASE were identified as described by Guelfi and colleagues <sup>32</sup> by mapping RNA-seq data to  
285 personalised genomes, an approach specifically chosen because it aims to minimise the impact of  
286 mapping biases. RNA-seq data generated from 49 putamen and 35 substantia nigra tissue samples  
287 from the UK Brain Expression Consortium was used for this analysis. All samples were obtained from  
288 neuropathologically normal individuals of European descent and sites with greater than 15 reads in a  
289 sample were tested for ASE. Only sites present in non-overlapping genes were considered and data  
290 from both the tissues were considered together to increase power. Sites with minimum FDR < 5%  
291 across samples were marked as ASE sites. Plots were generated using Gviz3, with gene and  
292 transcript details obtained from Ensembl v92.

293

## 294 **High Content siRNA Screen**

### 295 ***Cell plating and siRNA transfection***

296 siRNA was dispensed into Geltrex-coated 96-well CellCarrier Ultra plates (Perkin Elmer) at a final  
297 concentration of 30 nM using the Echo 555 acoustic liquid handler (Labcyte). For each well, 25  $\mu$ l of  
298 DMEM containing 4.8  $\mu$ l/ml of DharmaFECT1 transfection reagent was added and incubated for 30  
299 min before POE SH-SY5Y cells were seeded using the CyBio SELMA (Analytik Jena) at 15,000 cells per  
300 well, 100  $\mu$ l per well in DMEM + 10% FBS. Cells were incubated for 72 h before treatment with 10  
301  $\mu$ M oligomycin/10  $\mu$ M antimycin for 3 h to induce mitophagy.

### 302 ***IF and Image Capture and Analysis***

303 Cells were fixed with 4% PFA (Sigma-Aldrich, F8775), then blocked and permeabilised with 10% FBS,  
304 0.25% Triton X-100 in PBS for 1 h, before immunostaining with pUb(Ser65) and TOM20 primary  
305 antibodies (in 10% FBS/PBS) for 2 h at room temperature. After 3x PBS washes, AlexaFluor 568 anti-  
306 mouse and 488 anti-rabbit secondary antibodies and Hoechst 33342 (Thermo Scientific, 62249) were  
307 added (in 10% FBS/PBS, 1:2000 dilution for all) and incubated for 1 h at room temperature.  
308 Following a final 3x PBS washes, plates were imaged using the Opera Phenix (Perkin Elmer). 5x fields  
309 of view and 4x 1  $\mu\text{m}$  Z-planes were acquired per well, using the 40X water objective, NA1.1. Images  
310 were analysed in an automated way using the Columbus 2.8 analysis system (Perkin Elmer) to  
311 measure the integrated intensity of pUb(Ser65) within the whole cell (see Extended Data Fig. 1 and 2  
312 for image analysis workflow and parameters).

### 313 ***Screen quality control, data processing and candidate selection***

314 Screen plates were quality controlled based on the efficacy of the PINK1 siRNA control and O/A  
315 treatment window (minimum 3-fold). Data were checked for edge effects using Dotmatics Vortex  
316 visualization software. Raw data was quality controlled using robust Z prime  $> 0.5$ . Data were  
317 processed using Python for Z score calculation before visualization in Dotmatics Vortex. Candidates  
318 were considered a hit where Z score was  $\geq 2$  or  $\leq -2$ , and where replication of efficacy was seen both  
319 within and across plates.

### 320 ***siRNA libraries***

321 The siRNA libraries were purchased from Dharmacon as an ON-TARGETplus SMARTpool Cherry-pick  
322 siRNA library, 0.25 nmol in a 384-well plate. siRNAs were resuspended in RNase-free water for a final  
323 concentration of 20  $\mu\text{M}$ . SCR, PINK1 and PLK1 or KIF11 controls were added to the 384-well plate at  
324 a concentration of 20  $\mu\text{M}$  before dispensing into barcoded assay-ready plates.

325

### 326 **Mitochondrial enrichment and Western blotting**

327 POE SH-SY5Y cells were transfected with 100 nM siRNA and incubated for 72 h. Cell lysates were  
328 fractionated into cytoplasmic and mitochondria-enriched samples, and run on SDS-PAGE before IB  
329 with the Odyssey<sup>®</sup> CLx Imager (LI-COR Biosciences). Mitochondrial enrichment and Western blotting  
330 protocols were described previously<sup>43</sup>.

331

### 332 **Immunofluorescence**

333 POE SH-SY5Y cells were reverse transfected with 50 nM siRNA in 96-well CellCarrier Ultra plates  
334 according to the manufacturer's instructions and incubated for 72 h. Cells were then treated, fixed  
335 and stained as per the screening protocol detailed above (for treatment concentrations and times,  
336 see figures). Image intensities were not modified or pre-processed. Images are presented as

337 maximum projections of the pUb(Ser65) or PMPCB-488 channel for one field of view. Insets show  
338 the Hoechst 33342 channel for the same field.

339

#### 340 ***Drosophila* stocks and husbandry**

341 Flies were raised under standard conditions in a humidified, temperature-controlled incubator with  
342 a 12h:12h light:dark cycle at 25°C, on food consisting of agar, cornmeal, molasses, propionic acid and  
343 yeast. The following strains were obtained from the Bloomington *Drosophila* Stock Center  
344 (RRID:SCR\_006457): *mof* RNAi lines, P{TRiP.JF01701} (RRID:BDSC\_31401); and P{TRiP.HMS00537}  
345 (RRID:BDSC\_58281); *ns1* RNAi lines, P{TRiP.HMJ22458} (RRID:BDSC\_58328); the pan-neuronal *nSyb-*  
346 *GAL4* driver (RRID:BDSC\_51941); and dopaminergic neuron driver (TH-GAL4; RRID:BDSC\_8848); and  
347 control (*lacZ*) RNAi P{GD936}v51446) from the Vienna *Drosophila* Resource Center  
348 (RRID:SCR\_013805). All experiments were conducted using male flies.

349

#### 350 **Locomotor and lifespan assays**

351 The startle induced negative geotaxis (climbing) assay was performed using a counter-current  
352 apparatus. Briefly, 20-23 males were placed into the first chamber, tapped to the bottom, and given  
353 10 s to climb a 10 cm distance. This procedure was repeated five times (five chambers), and the  
354 number of flies that has remained into each chamber counted. The weighted performance of several  
355 group of flies for each genotype was normalized to the maximum possible score and expressed as  
356 *Climbing index*<sup>44</sup>.

357 For lifespan experiments, flies were grown under identical conditions at low-density. Progeny were  
358 collected under very light anaesthesia and kept in tubes of approximately 20 males each, around 50-  
359 100 in total. Flies were transferred every 2-3 days to fresh medium and the number of dead flies  
360 recorded. Percent survival was calculated at the end of the experiment after correcting for any  
361 accidental loss.

362

#### 363 **Immunohistochemistry and sample preparation**

364 *Drosophila* brains were dissected from aged flies and immunostained as described previously<sup>45</sup>.  
365 Adult brains were dissected in PBS and fixed in 4% formaldehyde for 30 min on ice, permeabilized in  
366 0.3% Triton X-100 for 3 times 20 min, and blocked with 0.3% Triton X-100 plus 4% goat serum in PBS  
367 for 4 h at RT. Tissues were incubated with anti-tyrosine hydroxylase (Immunostar Inc. #22491),  
368 diluted in 0.3% Triton X-100 plus 4% goat serum in PBS for 72 h at 4°C, then rinsed 3 times 20 min  
369 with 0.3% Triton X-100 in PBS, and incubated with the appropriate fluorescent secondary antibodies  
370 overnight at 4°C. The tissues were washed 2 times in PBS and mounted on slides using Prolong

371 Diamond Antifade mounting medium (Thermo Fisher Scientific). Brains were imaged with a Zeiss  
372 LMS 880 confocal. Tyrosine hydroxylase-positive neurons were counted under blinded conditions.

373

#### 374 **Statistical Analysis**

375 Intensity measurements from imaging experiments were normalised to SCR O/A for each  
376 experiment and presented as a percentage. N numbers are shown in figure legends and refer to the  
377 number of independent, replicate experiments. Within each experiment, the mean values of every  
378 condition were calculated from a minimum of 3 technical replicates. Intensity measurements from  
379 Western blot experiments were normalised to PINK1 O/A. GraphPad Prism 6 (La Jolla, California,  
380 USA) was used for statistical analyses and graph production. Data were subjected to either one-way  
381 or two-way ANOVA with Dunnett's post-hoc analysis for multiple comparisons, unless otherwise  
382 stated. All error bars indicate mean  $\pm$  standard deviation (SD) from replicate experiments.

383

384

385 **Acknowledgements.**

386 This work was supported in part by the UK Medical Research Council (MRC) funding to the Dementia  
387 Platform UK (MR/M02492X/1), MRC core funding to the High-Content Biology Platform at the MRC-  
388 UCL LMCB university unit (MC\_U12266B) and MRC MBU (MC\_UU\_00015/6), and by UCL  
389 Translational Research Office administered seed funds. MS, EA, CM and DT are funded by MRC  
390 MR/N026004/1. DM is supported by an MRC CASE studentship (MR/P016677/1). AM, MB and PW  
391 are funded by ARUK (ARUK-2018DDI-UCL). MR was supported by the UK MRC through the award of  
392 Tenure-track Clinician Scientist Fellowship (MR/N008324/1). This work was supported in part by the  
393 Intramural Research Programs of the National Institute on Aging (NIA). We also acknowledge the  
394 support of the NIHR BRC award to University College London Hospitals, UCL. Finally, the authors  
395 would like to thank the Genome Aggregation Database (gnomAD) and the groups that provided  
396 exome and genome variant data to these resources. A full list of contributing groups can be found at  
397 <https://gnomad.broadinstitute.org/about>.

398

399 **Author Contributions.**

400 HPF, PL, JH, AW and PW conceived the idea. MS, DM, EA, AM, DT, MB, PW, JH, AW, MR, PL and HPF  
401 designed the experiments. MS, DM, EA, AM, NW, NW, KDS, SG, DZ, AP, DT, KP, CM, CB and HPF  
402 carried out analysis and experiments. MS, DM, EA, AM, PW, CM, AW, MR, PL and HPF wrote the  
403 manuscript, with input from all co-authors. HPF, PL and MR supervised the project.

404

405 **Competing Interests:** The authors declare that they have no conflict of interest

406

407 **Correspondence and requests for materials should be addressed to [h.plun-favreau@ucl.ac.uk](mailto:h.plun-favreau@ucl.ac.uk).**

408

409

410 **REFERENCES**

- 411 1. Hardy, J., Lewis, P., Revesz, T., Lees, A. & Paisan-Ruiz, C. The genetics of Parkinson's  
412 syndromes: a critical review. *Curr. Opin. Genet. Dev.* **19**, 254–265 (2009).
- 413 2. Connolly, B. S. & Lang, A. E. Pharmacological treatment of Parkinson disease: A review. *JAMA*  
414 *- J. Am. Med. Assoc.* **311**, 1670–1683 (2014).
- 415 3. Chang, D. *et al.* A meta-analysis of genome-wide association studies identifies 17 new  
416 Parkinson's disease risk loci. *Nat. Genet.* (2017). doi:10.1038/ng.3955
- 417 4. Nalls, M. A. *et al.* Identification of novel risk loci, causal insights, and heritable risk for  
418 Parkinson's disease: a meta-analysis of genome-wide association studies. *Lancet Neurol.* **18**,  
419 1091–1102 (2019).
- 420 5. International Parkinson Disease Genomics Consortium, D. *et al.* Imputation of sequence  
421 variants for identification of genetic risks for Parkinson's disease: a meta-analysis of genome-  
422 wide association studies. *Lancet* (2011). doi:10.1016/S0140-6736(10)62345-8
- 423 6. Narendra, D., Tanaka, A., Suen, D.-F. & Youle, R. J. Parkin is recruited selectively to impaired  
424 mitochondria and promotes their autophagy. *J. Cell Biol.* **183**, 795–803 (2008).
- 425 7. McWilliams, T. G. & Muqit, M. M. PINK1 and Parkin: emerging themes in mitochondrial  
426 homeostasis. *Curr. Opin. Cell Biol.* **45**, 83–91 (2017).
- 427 8. Narendra, D. P. *et al.* PINK1 is selectively stabilized on impaired mitochondria to activate  
428 Parkin. *PLoS Biol.* **8**, e1000298 (2010).
- 429 9. Kazlauskaitė, A. *et al.* Parkin is activated by PINK1-dependent phosphorylation of ubiquitin at  
430 Ser65. *Biochem. J.* **460**, 127–39 (2014).
- 431 10. Shiba-Fukushima, K. *et al.* Phosphorylation of Mitochondrial Polyubiquitin by PINK1 Promotes  
432 Parkin Mitochondrial Tethering. *PLoS Genet.* **10**, e1004861 (2014).
- 433 11. Lazarou, M. *et al.* The ubiquitin kinase PINK1 recruits autophagy receptors to induce  
434 mitophagy. *Nature* (2015). doi:10.1038/nature14893
- 435 12. Plotegher, N. & Duchon, M. R. Crosstalk between Lysosomes and Mitochondria in Parkinson's  
436 Disease. *Front. Cell Dev. Biol.* (2017). doi:10.3389/fcell.2017.00110
- 437 13. Chatterjee, A. *et al.* MOF Acetyl Transferase Regulates Transcription and Respiration in  
438 Mitochondria. *Cell* **167**, 722–738.e23 (2016).
- 439 14. Giambartolomei, C. *et al.* Bayesian Test for Colocalisation between Pairs of Genetic  
440 Association Studies Using Summary Statistics. *PLoS Genet.* (2014).  
441 doi:10.1371/journal.pgen.1004383
- 442 15. Ramasamy, A. *et al.* Genetic variability in the regulation of gene expression in ten regions of  
443 the human brain. *Nat. Neurosci.* (2014). doi:10.1038/nn.3801

- 444 16. Lonsdale, J., Thomas, J., Salvatore, M., Phillips, R. & Lo, E. The Genotype-Tissue Expression  
445 (GTEx) project : Nature Genetics : Nature Publishing Group. *Nature* (2013).
- 446 17. Kia, D. A. *et al.* Integration of eQTL and Parkinson ' s disease GWAS data implicates 11 disease  
447 genes. (2019).
- 448 18. Ferrari, R. *et al.* Stratification of candidate genes for Parkinson's disease using weighted  
449 protein-protein interaction network analysis. *BMC Genomics* (2018). doi:10.1186/s12864-  
450 018-4804-9
- 451 19. Nalls, M. A. *et al.* Large-scale meta-analysis of genome-wide association data identifies six  
452 new risk loci for Parkinson's disease. *Nat. Genet.* (2014). doi:10.1038/ng.3043
- 453 20. Robak, L. A. *et al.* Excessive burden of lysosomal storage disorder gene variants in Parkinson's  
454 disease. *Brain* (2017). doi:10.1093/brain/awx285
- 455 21. Hou, X. *et al.* Age- and disease-dependent increase of the mitophagy marker phospho-  
456 ubiquitin in normal aging and Lewy body disease. *Autophagy* (2018).  
457 doi:10.1080/15548627.2018.1461294
- 458 22. Gusev, A. *et al.* Integrative approaches for large-scale transcriptome-wide association studies.  
459 *Nat. Genet.* (2016). doi:10.1038/ng.3506
- 460 23. Simon, R. P., Robaa, D., Alhalabi, Z., Sippl, W. & Jung, M. KATching-Up on Small Molecule  
461 Modulators of Lysine Acetyltransferases. *J. Med. Chem.* **59**, 1249–1270 (2016).
- 462 24. Sheikh, B. N. & Akhtar, A. The many lives of KATs — detectors, integrators and modulators of  
463 the cellular environment. *Nat. Rev. Genet.* **20**, 7–23 (2019).
- 464 25. Bertolin, G. *et al.* The TOMM machinery is a molecular switch in PINK1 and PARK2/PARKIN-  
465 dependent mitochondrial clearance. *Autophagy* **9**, 1801–1817 (2013).
- 466 26. Raja, S. J. *et al.* The nonspecific lethal complex is a transcriptional regulator in *Drosophila*.  
467 *Mol. Cell* **38**, 827–841 (2010).
- 468 27. Wray, S. & Lewis, P. A. A tangled web - tau and sporadic Parkinson's disease. *Frontiers in*  
469 *Psychiatry* (2010). doi:10.3389/fpsy.2010.00150
- 470 28. Stefansson, H. *et al.* A common inversion under selection in Europeans. *Nat. Genet.* (2005).  
471 doi:10.1038/ng1508
- 472 29. Zody, M. C. *et al.* Evolutionary toggling of the MAPT 17q21.31 inversion region. *Nat. Genet.*  
473 (2008). doi:10.1038/ng.193
- 474 30. Pittman, A. M. *et al.* Linkage disequilibrium fine mapping and haplotype association analysis  
475 of the tau gene in progressive supranuclear palsy and corticobasal degeneration. *J. Med.*  
476 *Genet.* (2005). doi:10.1136/jmg.2005.031377
- 477 31. Hutton, M. *et al.* Association of missense and 5'-splice-site mutations in tau with the



- 478 inherited dementia FTDP-17. *Nature* (1998). doi:10.1038/31508
- 479 32. Guelfi, S. *et al.* Regulatory sites for known and novel splicing in human basal ganglia are  
480 enriched for disease-relevant information. *bioRxiv* (2019). doi:10.1101/591156
- 481 33. Fung, H. C. *et al.* Genome-wide genotyping in Parkinson’s disease and neurologically normal  
482 controls: first stage analysis and public release of data. *Lancet Neurol.* (2006).  
483 doi:10.1016/S1474-4422(06)70578-6
- 484 34. Dong, X. *et al.* Enhancers active in dopamine neurons are a primary link between genetic  
485 variation and neuropsychiatric disease. *Nat. Neurosci.* (2018). doi:10.1038/s41593-018-0223-  
486 0
- 487 35. Lai, Y. *et al.* Phosphoproteomic screening identifies Rab GTP ases as novel downstream  
488 targets of PINK 1 . *EMBO J.* (2015). doi:10.15252/embj.201591593
- 489 36. Sheikh, B. N., Guhathakurta, S. & Akhtar, A. The non-specific lethal ( NSL ) complex at the  
490 crossroads of transcriptional control and cellular homeostasis . *EMBO Rep.* (2019).  
491 doi:10.15252/embr.201847630
- 492 37. Swatek, K. N. & Komander, D. Ubiquitin modifications. *Cell Res.* (2016).  
493 doi:10.1038/cr.2016.39
- 494 38. Valente, E. M. *et al.* Hereditary early-onset Parkinson’s disease caused by mutations in  
495 PINK1. *Sci. (New York, NY)* **304**, 1158–1160 (2004).
- 496 39. Kitada, T. *et al.* Mutations in the parkin gene cause autosomal recessive juvenile  
497 parkinsonism. *Nature* (1998). doi:10.1038/33416
- 498 40. Chu, C. T. Mechanisms of selective autophagy and mitophagy: Implications for  
499 neurodegenerative diseases. *Neurobiology of Disease* (2019). doi:10.1016/j.nbd.2018.07.015
- 500 41. Pruim, R. J. *et al.* LocusZoom: Regional visualization of genome-wide association scan results.  
501 in *Bioinformatics* (2011). doi:10.1093/bioinformatics/btq419
- 502 42. Ardley, H. C. *et al.* Inhibition of proteasomal activity causes inclusion formation in neuronal  
503 and non-neuronal cells overexpressing Parkin. *Mol. Biol. Cell* **14**, 4541–4556 (2003).
- 504 43. Soutar, M. P. M. *et al.* AKT signalling selectively regulates PINK1 mitophagy in SHSY5Y cells  
505 and human iPSC-derived neurons. 1–11 (2018). doi:10.1038/s41598-018-26949-6
- 506 44. Greene, J. C. *et al.* Mitochondrial pathology and apoptotic muscle degeneration in *Drosophila*  
507 parkin mutants. *Proc. Natl. Acad. Sci. U. S. A.* **100**, 4078–4083 (2003).
- 508 45. Whitworth, A. J. *et al.* Increased glutathione S-transferase activity rescues dopaminergic  
509 neuron loss in a *Drosophila* model of Parkinson’s disease. *Proc. Natl. Acad. Sci. U. S. A.* **102**,  
510 8024–8029 (2005).
- 511 46. Lek, M. *et al.* Analysis of protein-coding genetic variation in 60,706 humans. *Nature* (2016).

512 doi:10.1038/nature19057

513

514 **FIGURE LEGENDS**

515

516 **Figure 1 - Selection of the genes for the PINK1-dependent mitophagy screening.**

517 **A.** The heat-map represents increasing evidence for gene prioritization (white, light blue, and dark  
518 blue: one, two, and three evidences, respectively). ColB = coloc analysis using Braineac, ColG = coloc  
519 analysis using GTEx, WPPINA = weighted protein interaction network; GWAS = genes prioritised in  
520 PD-GWAS<sup>3</sup>.

521 **B.** Genes prioritised by means of multiple prediction techniques, grouped based on the types of  
522 evidences.

523 **C.** Venn diagram highlighting the three genes prioritised by means of three prediction techniques.

524

525 **Figure 2 – High content mitophagy screen identifies KAT8 as a modulator of pUb(Ser65) levels.**

526 **A.** pUb(Ser65) Z-scores of one representative mitophagy screen plate.

527 **B.** Overview of the PD GWAS genetic signal at the *KAT8* locus.

528

529 **Figure 3 - KAT8 knockdown decreases pUb(Ser65).**

530 **A.** Representative images of pUb(Ser65) following treatment of SCR, PINK1 and KAT8 siRNA KD POE  
531 SH-SY5Y with 1  $\mu$ M O/A for 3 h. Insets show the nuclei for the same fields. Scale bar: 20  $\mu$ m.

532 **B.** Quantification of pUb(Ser65) levels in A (n=3, two-way ANOVA with Dunnett's correction).

533 **C.** Representative IB of mitochondrial fractions from SCR, PINK1 and KAT8 KD POE SH-SY5Y treated  
534 with 1  $\mu$ M O/A for 1.5 or 3 h.

535 **D.** Quantification of pUb(Ser65) in C (n=5, one-way ANOVA with Dunnett's correction).

536 **E.** pUb(Ser65) Z-scores of one representative KAT screen plate. See Supplementary Table 4 for the  
537 complete list of the genes screened.

538 Data are shown as mean  $\pm$  SD.

539

540 **Figure 4 – Knockdown of the mitochondrial components of the NSL complex reduces pUb(Ser65)**  
541 **levels.**

542 **A.** Schematic representation of the NSL complex.

543 **B, C.** Quantification of pUb(Ser65) following treatment of SCR, PINK1 or NSL components siRNA KD  
544 POE SH-SY5Y cells with 1  $\mu$ M O/A for 1.5 h (B) or 3 h (C). Data are shown as mean  $\pm$  SD; n=6, one-way  
545 ANOVA with Dunnett's correction.

546

547 **Figure 5 - KANSL1 knockdown decreases pUb(Ser65).**

548 **A.** Representative images of pUb(Ser65) following treatment of SCR, PINK1 and KANSL1 KD POE SH-  
549 SY5Y cells with 1  $\mu$ M O/A for 3 h. Insets show the nuclei for the same fields. Scale bar: 20  $\mu$ m.

550 **B.** Quantification of pUb(Ser65) in A (n=3, two-way ANOVA with Dunnett's correction).

551 **C.** Representative IB of mitochondrial fractions from SCR, PINK1 and KANSL1 KD POE SH-SY5Y  
552 treated with 1  $\mu$ M O/A for 1.5 or 3 h.

553 **D.** Quantification of pUb(Ser65) in C (n=5, one-way ANOVA with Dunnett's correction).

554 Data are shown as mean  $\pm$  SD.

555

556 **Figure 6 - KANSL1 and KAT8 knockdown decrease pUb(Ser65).**

557 **A.** Representative images of pUb(Ser65) (green) following treatment of SCR, PINK1, KAT8 and  
558 KANSL1 KD POE SH-SY5Y cells with 1  $\mu$ M O/A for 0-7 h. Insets show the nuclei for the same fields.

559 Scale bar: 20  $\mu$ m.

560 **B.** Quantification of pUb(Ser65) in A (n=6, two-way ANOVA with Dunnett's correction).

561 Data are shown as mean  $\pm$  SD.

562

563 **Figure 7 - KANSL1 and KAT8 knockdown decrease mitochondrial clearance.**

564 **A.** Representative images of PMPCB (green) and nuclei (blue) following treatment of SCR, PINK1,  
565 KAT8 and KANSL1 KD POE SH-SY5Y cells with 1  $\mu$ M O/A for 0, 3, 6, 9 h. Scale bar: 10  $\mu$ m.

566 **B.** Quantification of the number of PMPCB spots in A (n=5, two-way ANOVA with Dunnett's  
567 correction).

568 Data are shown as mean  $\pm$  SD.

569

570 **Figure 8 - ASE sites in KANSL1 in LD with the H1/H2 SNP.**

571 **A.** ASEs derived from putamen and substantia nigra in high linkage disequilibrium with the H1/H2  
572 tagging SNP, rs12185268 and their position along the *KANSL1* gene. The missense variants track  
573 displays the variants annotated as missense by gnomAD v2.1.1<sup>46</sup>. The valid track displays the  
574 heterozygous sites (orange = missense) with an average read depth greater than 15 reads across all  
575 samples, which were examined for ASE. The topmost track displays the FDR-corrected minimum -  
576 log<sub>10</sub> p-value across samples for the sites that show an ASE in at least one sample.

577 **B.** Conservation of the KANSL1 protein across species. The four coding variants in the *KANSL1* gene  
578 are in high LD ( $r^2 > 0.8$ ) with the H1/H2 haplotypes.

579

580 **Figure 9. High content mitophagy screening of the ORFs on the 17q21 locus identifies only KANSL1**  
581 **as a modulator of pUb(Ser65) levels.**

582 pUb(Ser65) Z-scores of one representative 17q21 locus screen plate. See Supplementary Table 8 for  
583 the complete list of the genes screened.

584

585 **EXTENDED FIGURE LEGENDS**

586 **Extended Data Figure 1. High Content siRNA Screen for modulators of pUb(Ser65).**

587 **A.** Workflow of the high content screen for O/A-induced pUb(Ser65) levels.

588 **B.** Fold decrease in TOM20 levels following 1.5 and 3 h treatment with 0.1, 1 and 10  $\mu\text{M}$  O/A,  
589 compared to DMSO control.

590 **C.** Representative images of TOM20 and pUb(Ser65) following 3 h treatment of SCR KD POE SH-SY5Y  
591 cells with 10  $\mu\text{M}$  O/A. Scale bar: 20  $\mu\text{m}$ .

592 **D.** Quantification of the co-localization in **C** as % of TOM20-positive pUb(Ser65) spots. Graph shows  
593 all replicates of non-transfected, SCR, PINK1 and PLK1 KD for 3 independent experiments.

594 **E.** Representative images of pUb(Ser65) following treatment of SCR and PINK1 KD POE SH-SY5Y cells  
595 with 10  $\mu\text{M}$  O/A for 3 h. Scale bar: 20  $\mu\text{m}$ .

596 **F.** Quantification of pUb(Ser65) in **E** (n=6, two-way ANOVA with Tukey's multiple comparisons test).

597 **G.** Representative analysis of integrated intensity of pUb(Ser65) and TOM20 for a single HCS plate.

598 **H.** pUb(Ser65) Z-scores of the two other replicate screen plates.

599 Data are shown as mean  $\pm$  SD.

600

601 **Extended Data Figure 2. Image processing workflow of the high content screen for O/A induced**  
602 **pUb(Ser65).**

603 Images were loaded as maximum projections. The Hoechst 33342 channel was used to find the  
604 nuclei and border nuclei were excluded. The cytoplasm was then found on the calculated Hoechst +  
605 TOM20-568 image. The pUb(Ser65)-488 spots were identified within the whole cell and their  
606 intensity measured. The outputs of the analysis were the number of nuclei selected and the mean  
607 integrated pUb(Ser65) intensity, calculated as the area of the cell covered by pUb(Ser65) spots x  
608 corrected intensity of the spots. Analysis parameters for each building block of the Columbus  
609 workflow are detailed in the boxes.

610

611 **Extended Data Figure 3. KAT8 knockdown has no effect on cell viability.**

612 **A.** Representative images of nuclei following treatment of SCR, PINK1 and PLK1 siRNA KD POE SH-  
613 SY5Y cells with 10  $\mu\text{M}$  O/A for 3 h. Scale bar: 20  $\mu\text{m}$ .

614 **B.** Quantification of the number of nuclei in A (n=6, two-way ANOVA with Tukey's multiple  
615 comparisons test).

616 **C.** Z-scores of a representative screen plate showing that KAT8 or PINK1 siRNA KD don't affect cell  
617 viability, on the contrary to PLK-1 KD.

618 Data are shown as mean  $\pm$  SD.

619

620 **Extended Data Figure 4. KAT8 eQTLs colocalise with SNPs associated with PD risk**

621 The x-axis displays the physical position on chromosome 16 in megabases. The minus log p-values  
622 are plotted for every SNP present in both the PD GWAS<sup>3</sup> and KAT8 eQTLs derived from the GTEx V7  
623 caudate data. The p-values for the PD GWAS are plotted in yellow and p-values for KAT8 eQTLs are  
624 plotted in blue.

625

626 **Extended Data Figure 5. KAT8 knockdown decreases pUb(Ser65) levels.**

627 **A.** Representative images of pUb(Ser65) following treatment of SCR, PINK1 and KAT8 siRNA KD POE  
628 SH-SY5Y with 10  $\mu$ M O/A for 3 h. Insets show nuclear staining for the same fields. Scale bar: 20  $\mu$ m.

629 **B.** Quantification of pUb(Ser65) levels in A (n=3, two-way ANOVA with Dunnett's correction).

630 **C.** Representative IB of mitochondrial fractions from SCR, PINK1 and KAT8 KD POE SH-SY5Y treated  
631 with 10  $\mu$ M O/A for 1.5 or 3 h.

632 **D, E.** Quantification of pUb(Ser65) (**D**) and KAT8 levels (**E**) in C (n=5, one-way ANOVA with Dunnett's  
633 correction).

634 Data are shown as mean  $\pm$  SD.

635

636 **Extended Data Figure 6. Neuronal loss of *mof* or *ns1* causes locomotor deficit, shortened lifespan  
637 and neurodegeneration.**

638 **A, B.** Climbing ability of pan-neuronal (*nSyb-GAL4*) driven knockdown of *mof* (**A**) or *ns1* (**B**)  
639 measured at the indicated age of adults, compared to control RNAi (A: Kruskal-Wallis test, with  
640 Dunn's post-hoc multiple comparisons; B: Mann-Whitney test).

641 **C, D.** Lifespan of *mof* (**C**) or *ns1* (**D**) pan-neuronal knockdown (*nSyb-GAL4*) compared to control RNAi  
642 (Log-rank (Mantel-Cox) test).

643 **E, F.** Quantification of dopaminergic neurons (PPL1 cluster) after pan-neuronal or dopaminergic (DA)  
644 neuron (*TH-GAL4*) driven depletion of *mof* (**E**), *ns1* (**F**), or control RNAi. Representative images of  
645 PPL1 neurons (as bounded by the box) under depletion conditions are shown. Flies were aged 30  
646 days, except for pan-neuronal *ns1* kd which are 16-days-old. Scale bar: 20  $\mu$ m; Mann-Whitney test.

647 For all tests, n numbers are indicated in the graphs; p<0.0001 = \*\*\*\*; p<0.001 = \*\*\*.

648

649 **Extended Data Figure 7. Overview of the PD GWAS genetic signal at the *MAPT* locus.**

650 **A.** *MAPT* primary GWAS signal.

651 **B.** *MAPT* conditional GWAS signal.

652

653 **Extended Data Figure 8. ASE sites in *MAPT* in LD with the H1/H2 SNP.**

654 ASEs derived from putamen and substantia nigra that are in LD with the H1/H2 tagging SNP,

655 rs12185268 and their position along the *MAPT* gene. The missense variants track displays the

656 variants annotated as missense by gnomAD v2.1.1<sup>46</sup>. The valid track displays the heterozygous sites

657 (orange = missense) with an average read depth greater than 15 reads across all samples, in LD with

658 H1/H2, which were examined for ASE. The topmost track displays the  $-\log_{10}$  scale for the minimum

659 FDR across samples for the sites that show an ASE in at least one sample.

**A**

| Gene    | CoIB/G | WPPINA | GWAS |
|---------|--------|--------|------|
| CAB39L  | X      |        |      |
| CCNT2   |        |        | X    |
| CD38    | X      |        | X    |
| CTSB    | X      | X      | X    |
| DDRGK1  |        |        | X    |
| DGKQ    |        |        | X    |
| GALC    | X      |        | X    |
| GBA     |        | X      | X    |
| GPNMB   | X      |        | X    |
| HSD3B7  | X      |        |      |
| INPP5F  |        | X      |      |
| KAT8    | X      | X      | X    |
| KLHL7   | X      |        | X    |
| LRRK2   |        | X      | X    |
| LSM7    | X      |        | X    |
| MAPT    |        | X      | X    |
| NCKIPSD | X      | X      | X    |
| NSF     |        | X      |      |
| NUCKS1  | X      |        | X    |
| NUPL2   | X      |        | X    |
| PDLIM2  | X      |        | X    |
| PM20D1  | X      |        |      |
| RAB7L1  | X      | X      |      |
| SH3GL2  |        | X      | X    |
| SLC41A1 | X      |        | X    |
| SNCA    |        |        | X    |
| SPPL2B  | X      |        |      |
| STK39   |        |        | X    |
| VAMP4   | X      |        |      |
| WDR6    | X      |        |      |
| ZNF646  |        |        | X    |

**B**

| Prediction Technique | Genes   |
|----------------------|---------|
| CoIB/G; GWAS; WPPINA | CTSB    |
|                      | KAT8    |
|                      | NCKIPSD |
| CoIB/G; GWAS         | CD38    |
|                      | GALC    |
|                      | GPNMB   |
|                      | KLHL7   |
|                      | LSM7    |
|                      | NUCKS1  |
|                      | NUPL2   |
|                      | PDLIM2  |
|                      | SLC41A1 |
| CoIB/G; WPPINA       | RAB7L1  |
| GWAS; WPPINA         | GBA     |
|                      | LRRK2   |
|                      | MAPT    |
|                      | SH3GL2  |

**C**

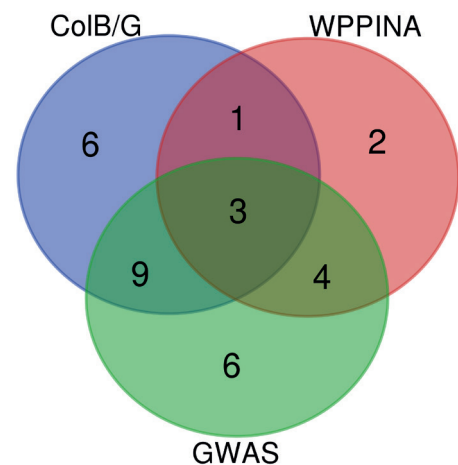

**Figure 1 - Selection of the genes for the PINK1-dependent mitophagy screening.**

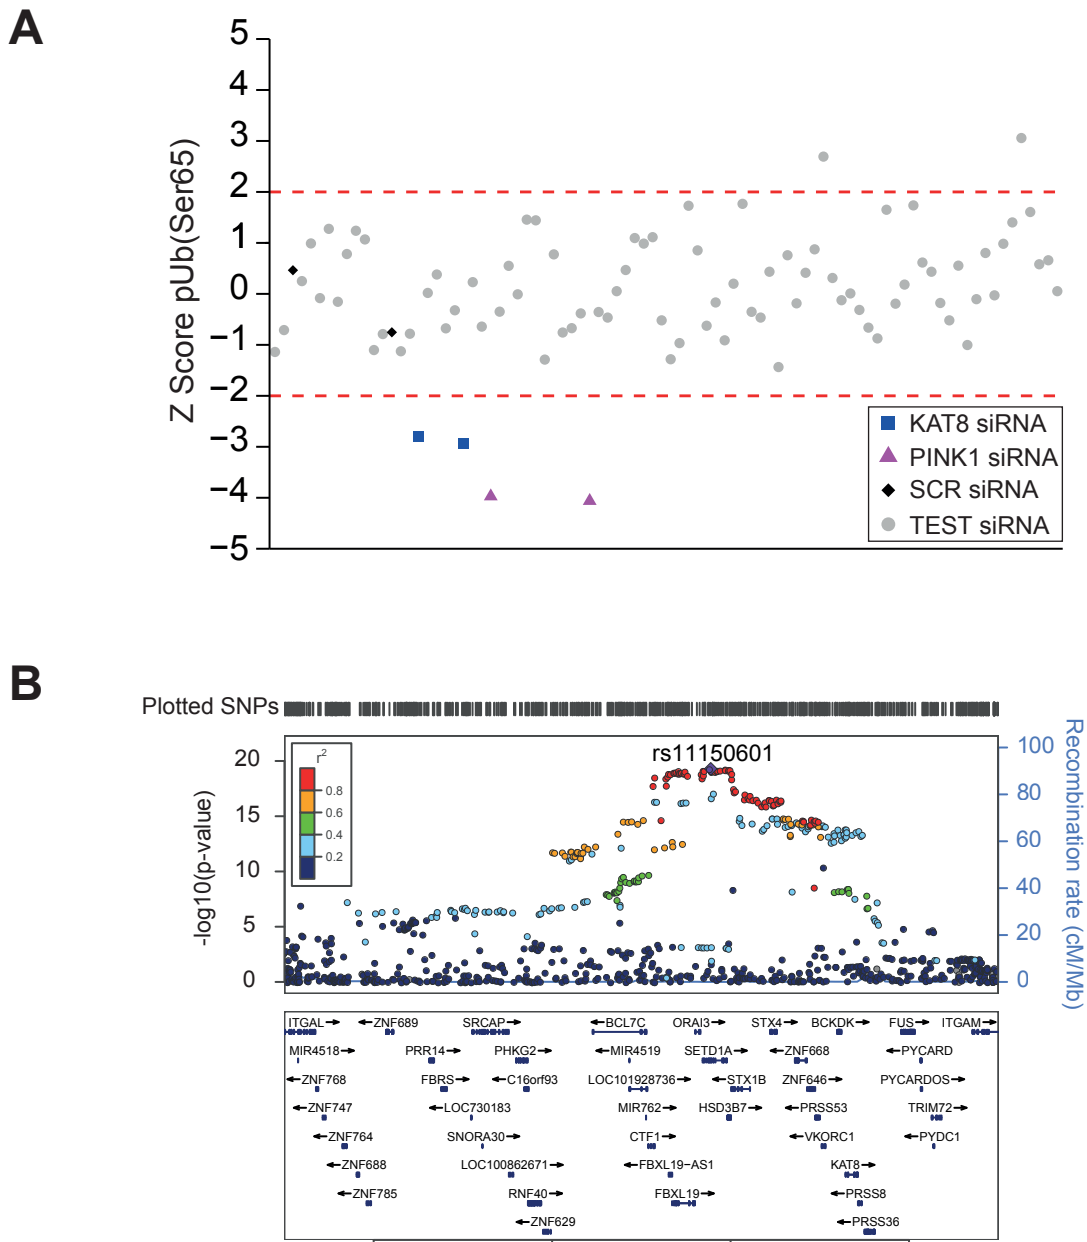

Figure 2 – High content mitophagy screen identifies KAT8 as a modulator of pUb(Ser65) levels.



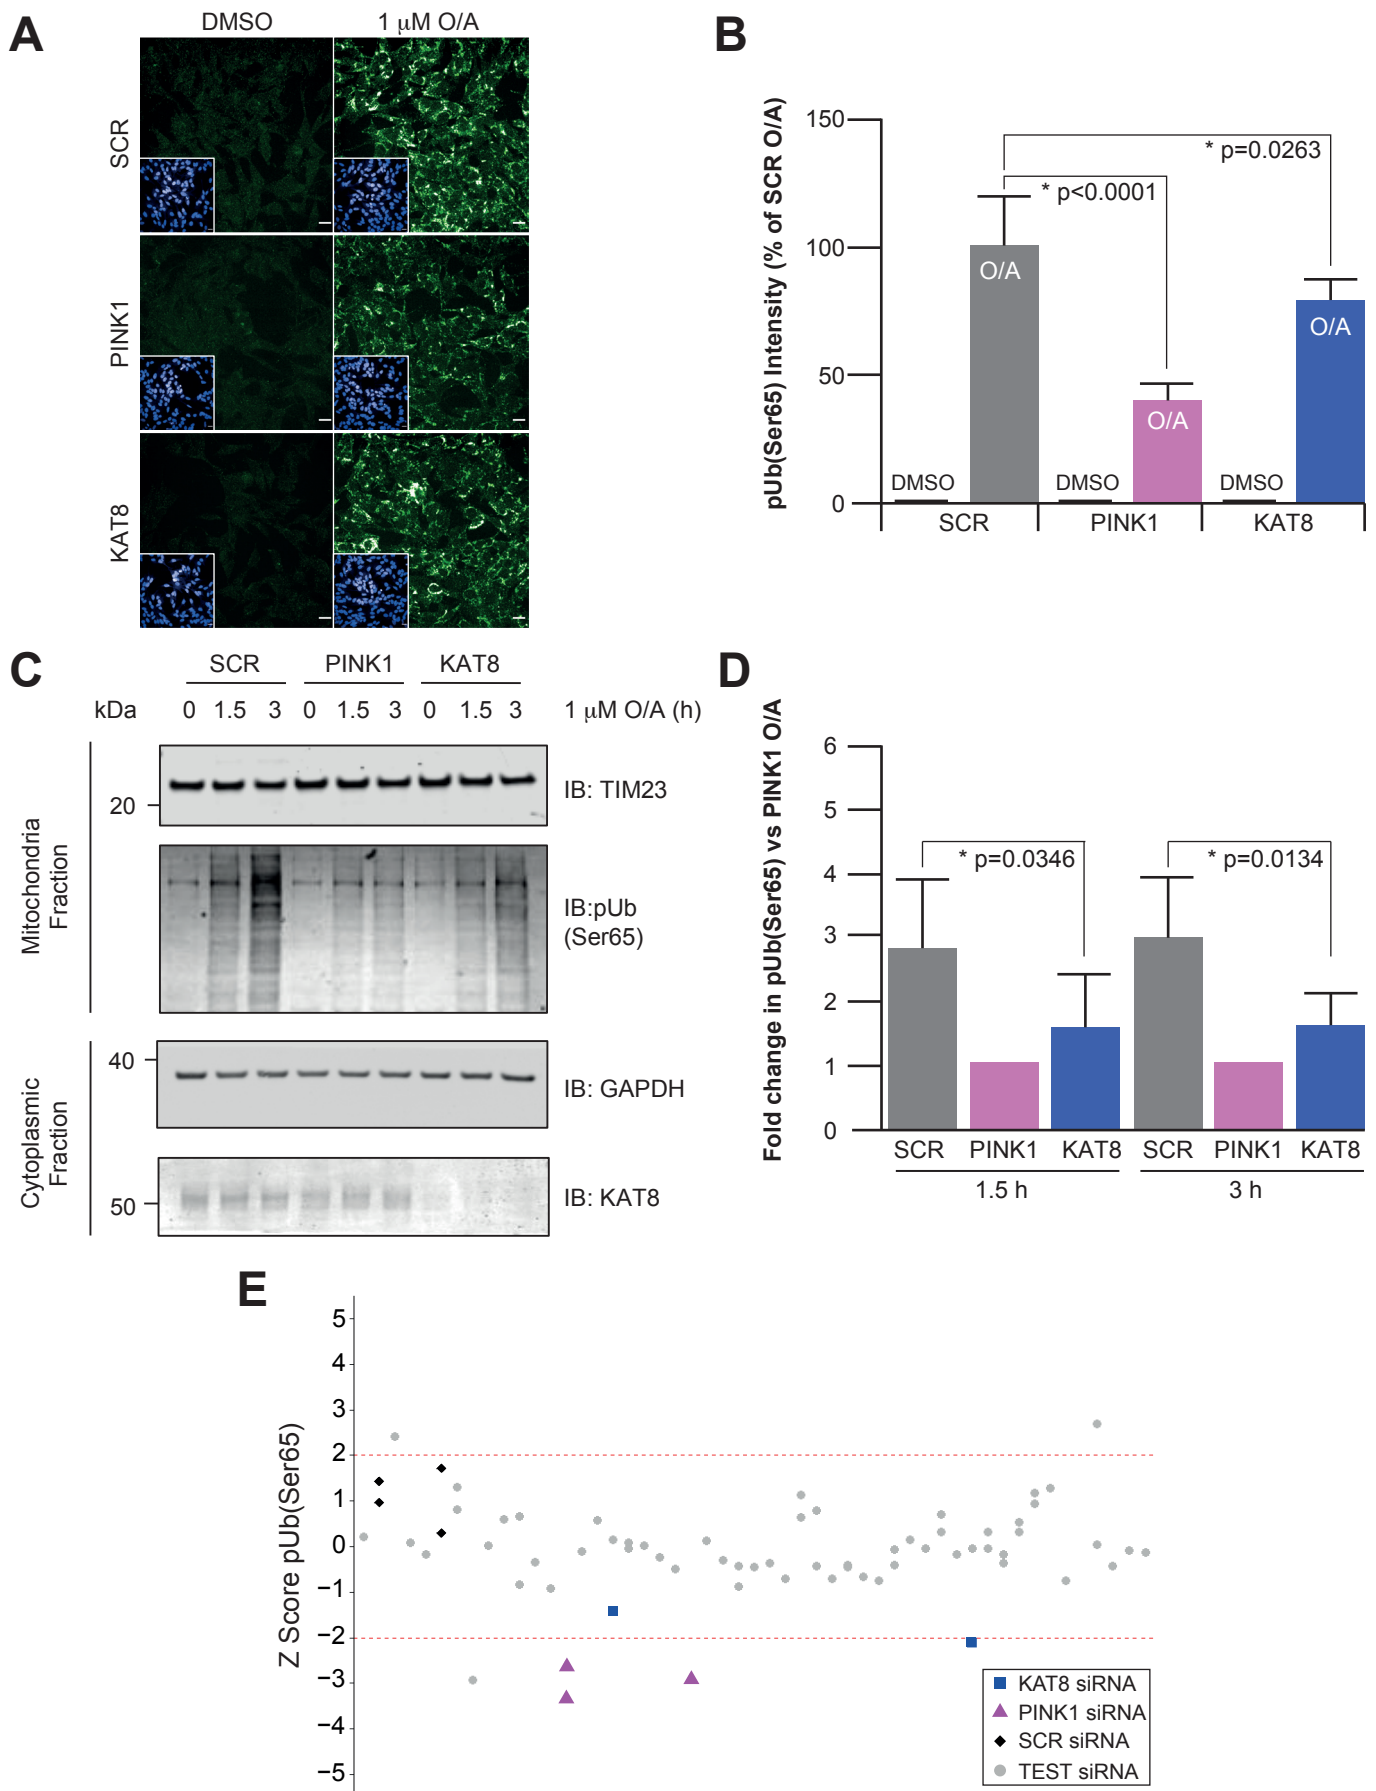

Figure 3 - KAT8 knockdown decreases pUb(Ser65).

**A**

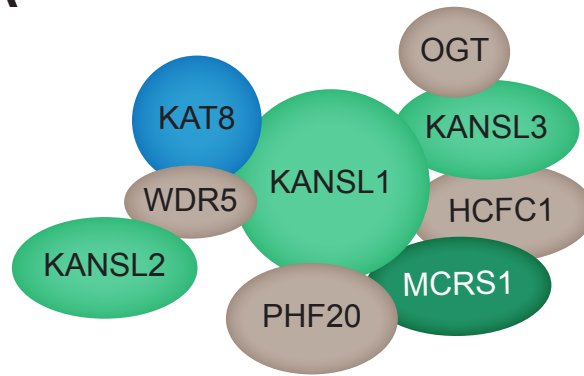

**B**

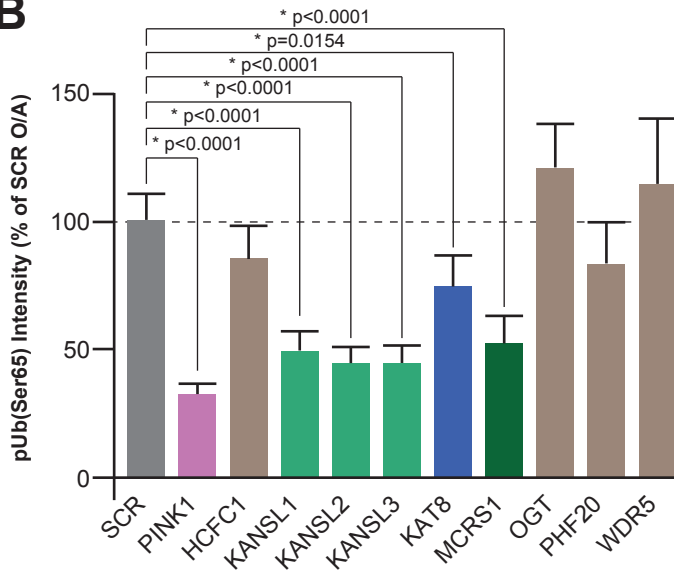

**C**

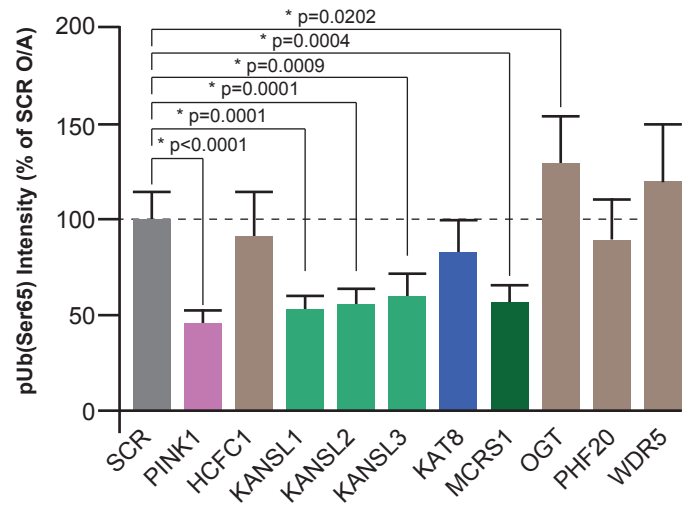

Figure 4 – Knockdown of the mitochondrial components of the NSL complex reduces pUb(Ser65) levels.

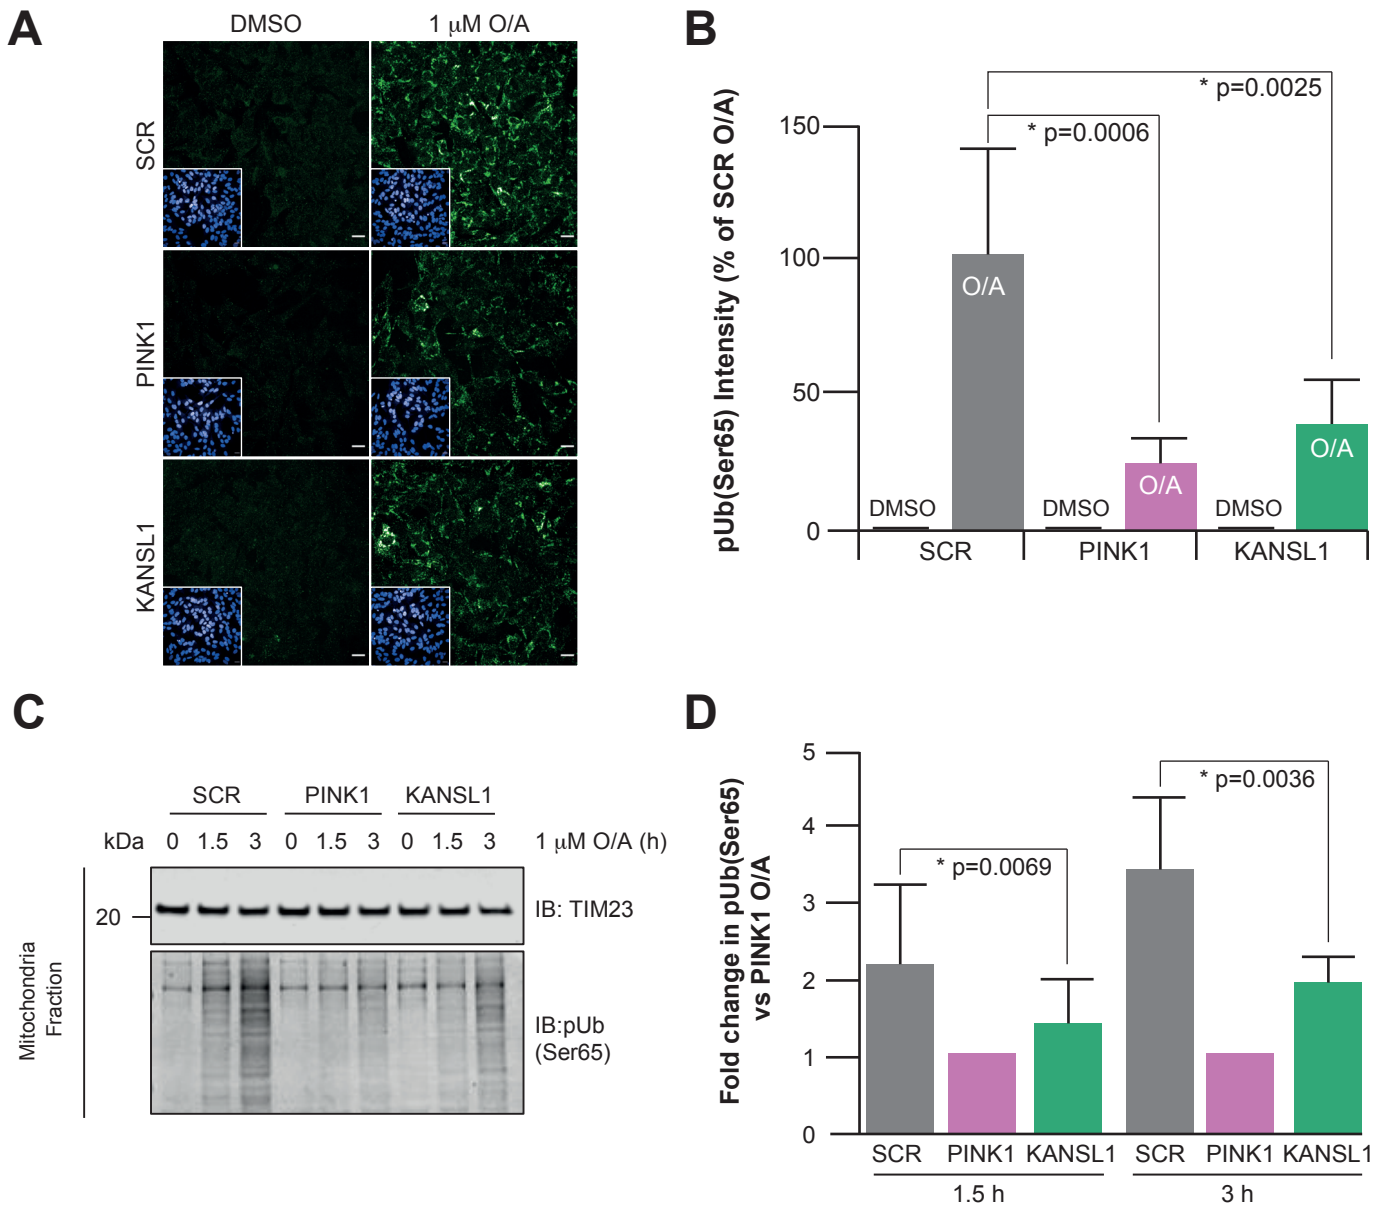

Figure 5 - KANSL1 knockdown decreases pUb(Ser65).

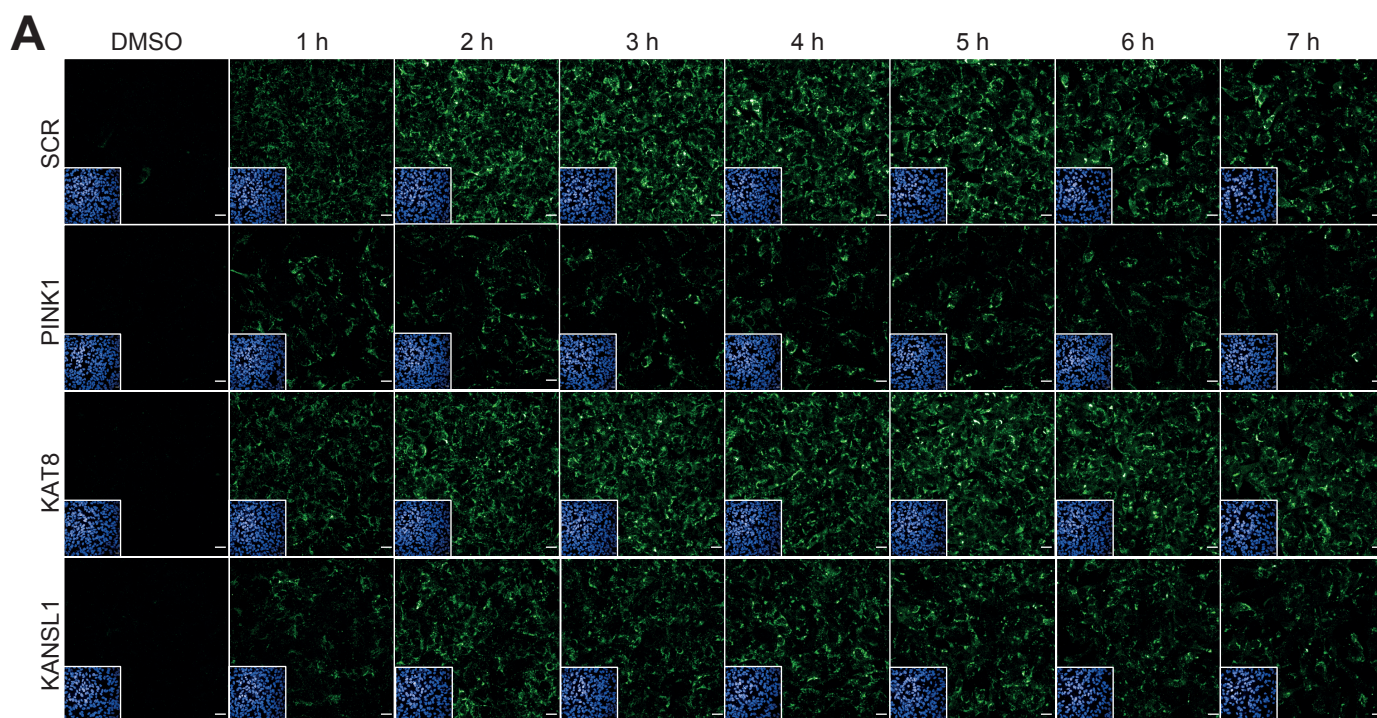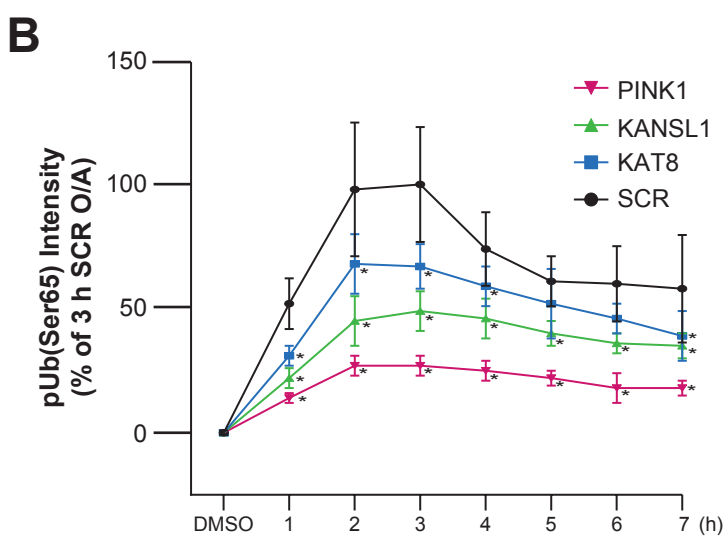

Figure 6 - KANSL1 and KAT8 knockdown decrease pUb(Ser65).

**A**

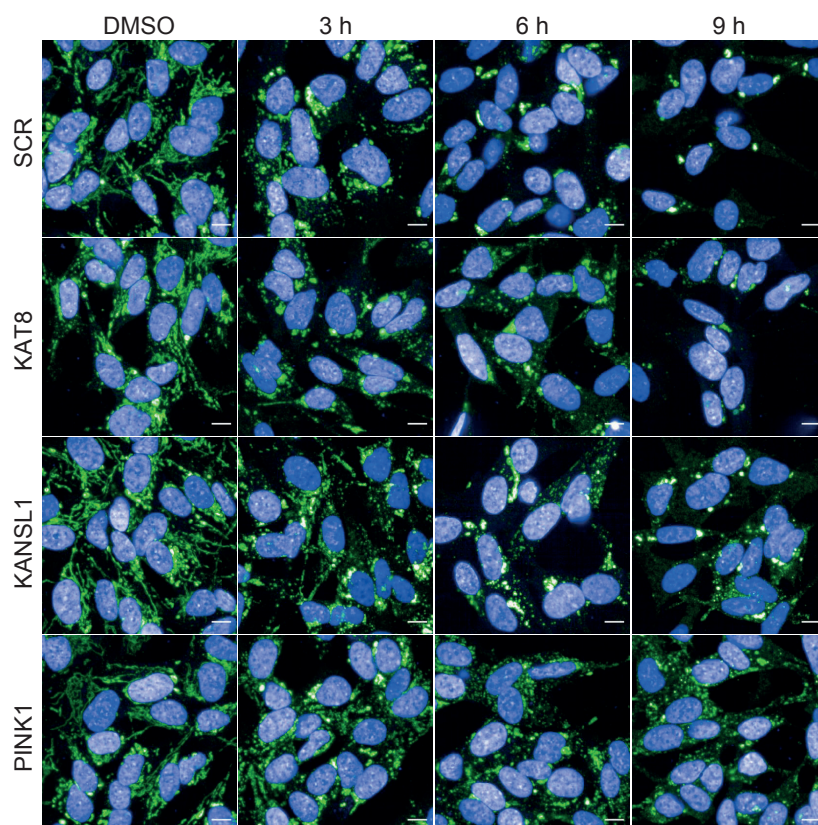

**B**

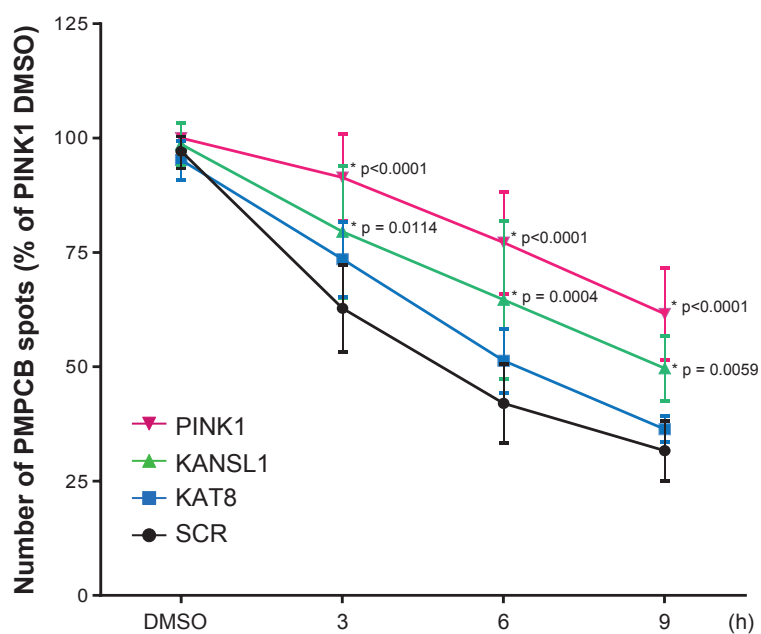

Figure 7 – KANSL1 and KAT8 knockdown decrease mitochondrial clearance.

**A**

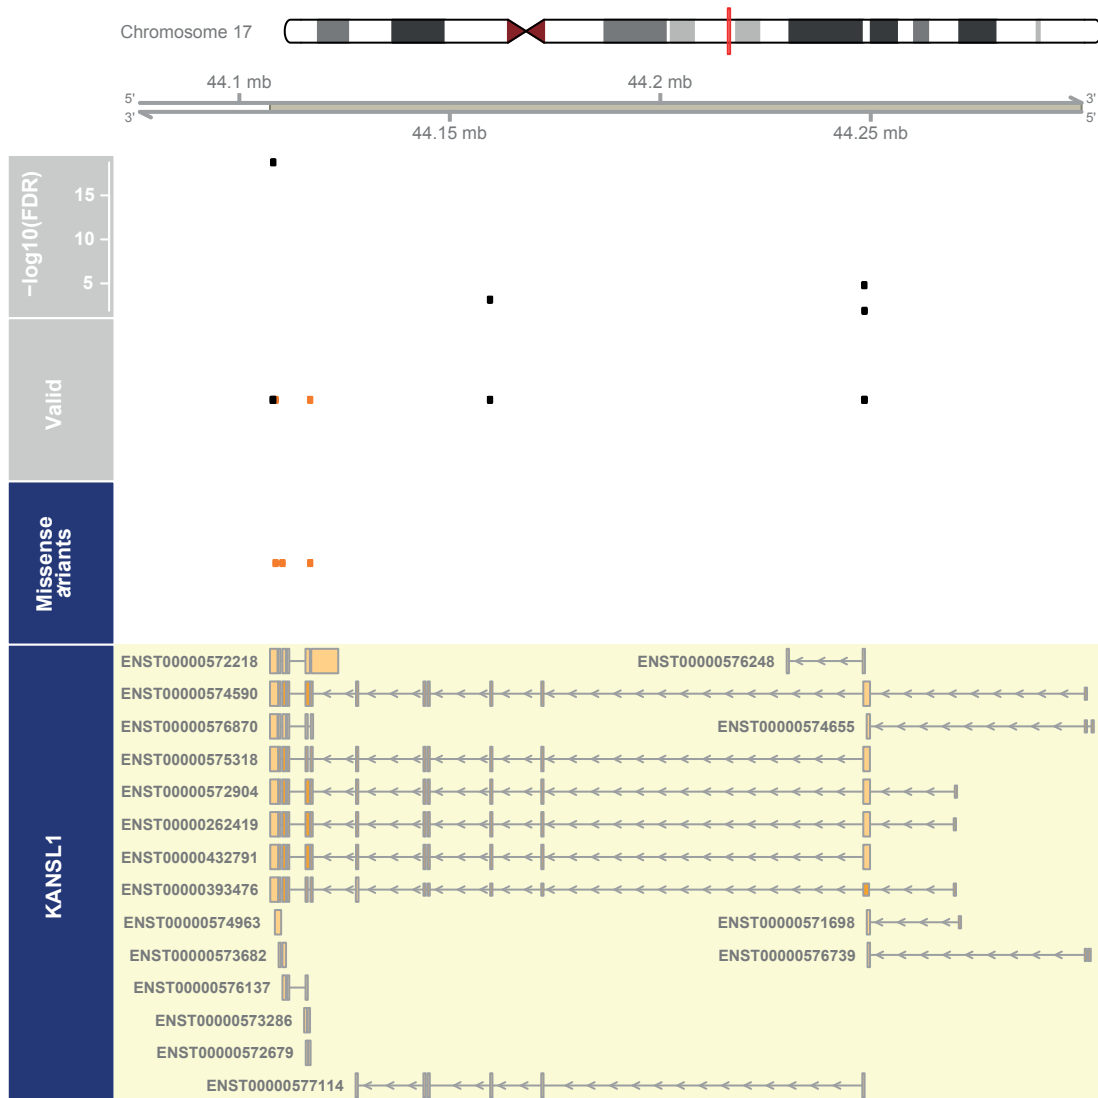

**B**

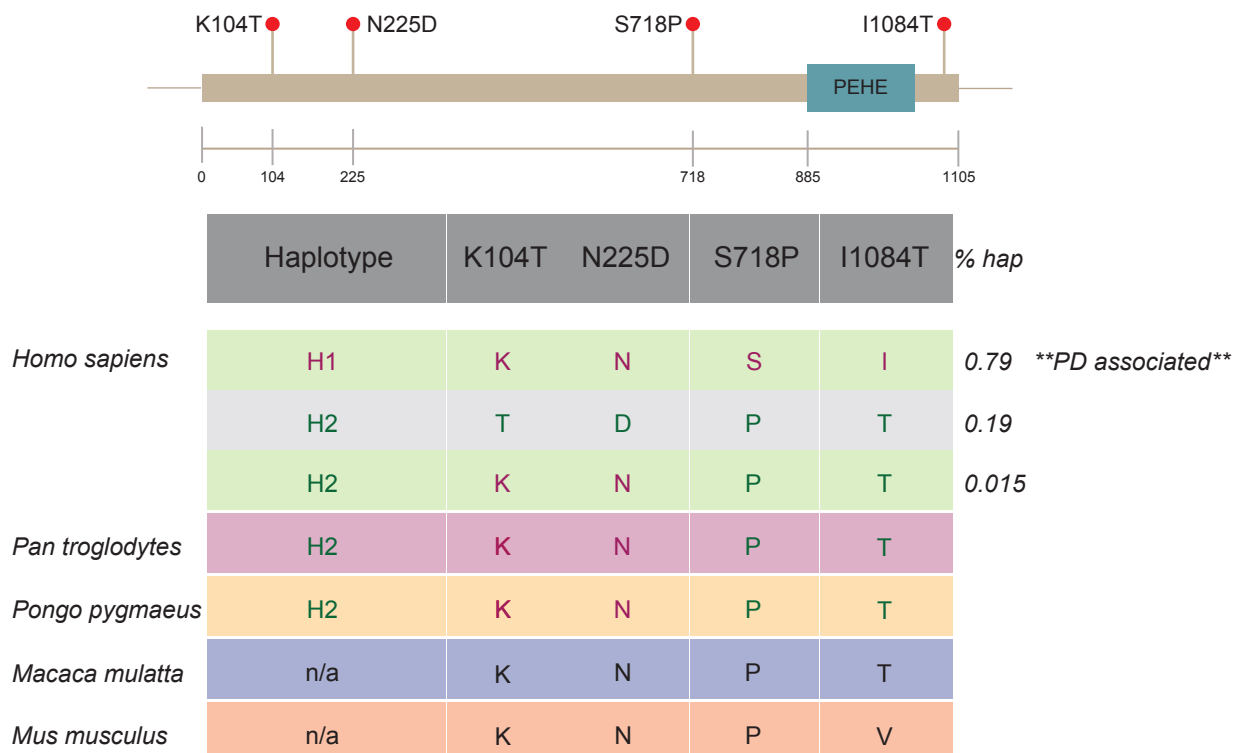

Figure 8 - ASE sites in KANSL1 in LD with the H1/H2 SNP.

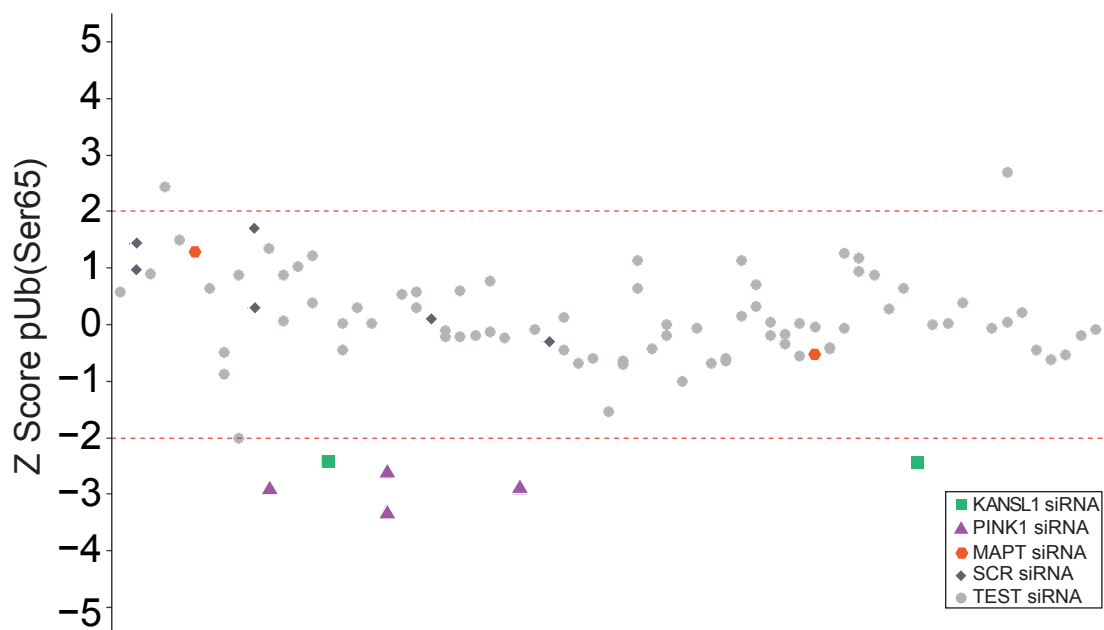

**Figure 9 – High content mitophagy screening of the ORFs on the the 17q21 locus identifies only KANSL1 as a modulator of pUb(Ser65) levels.**

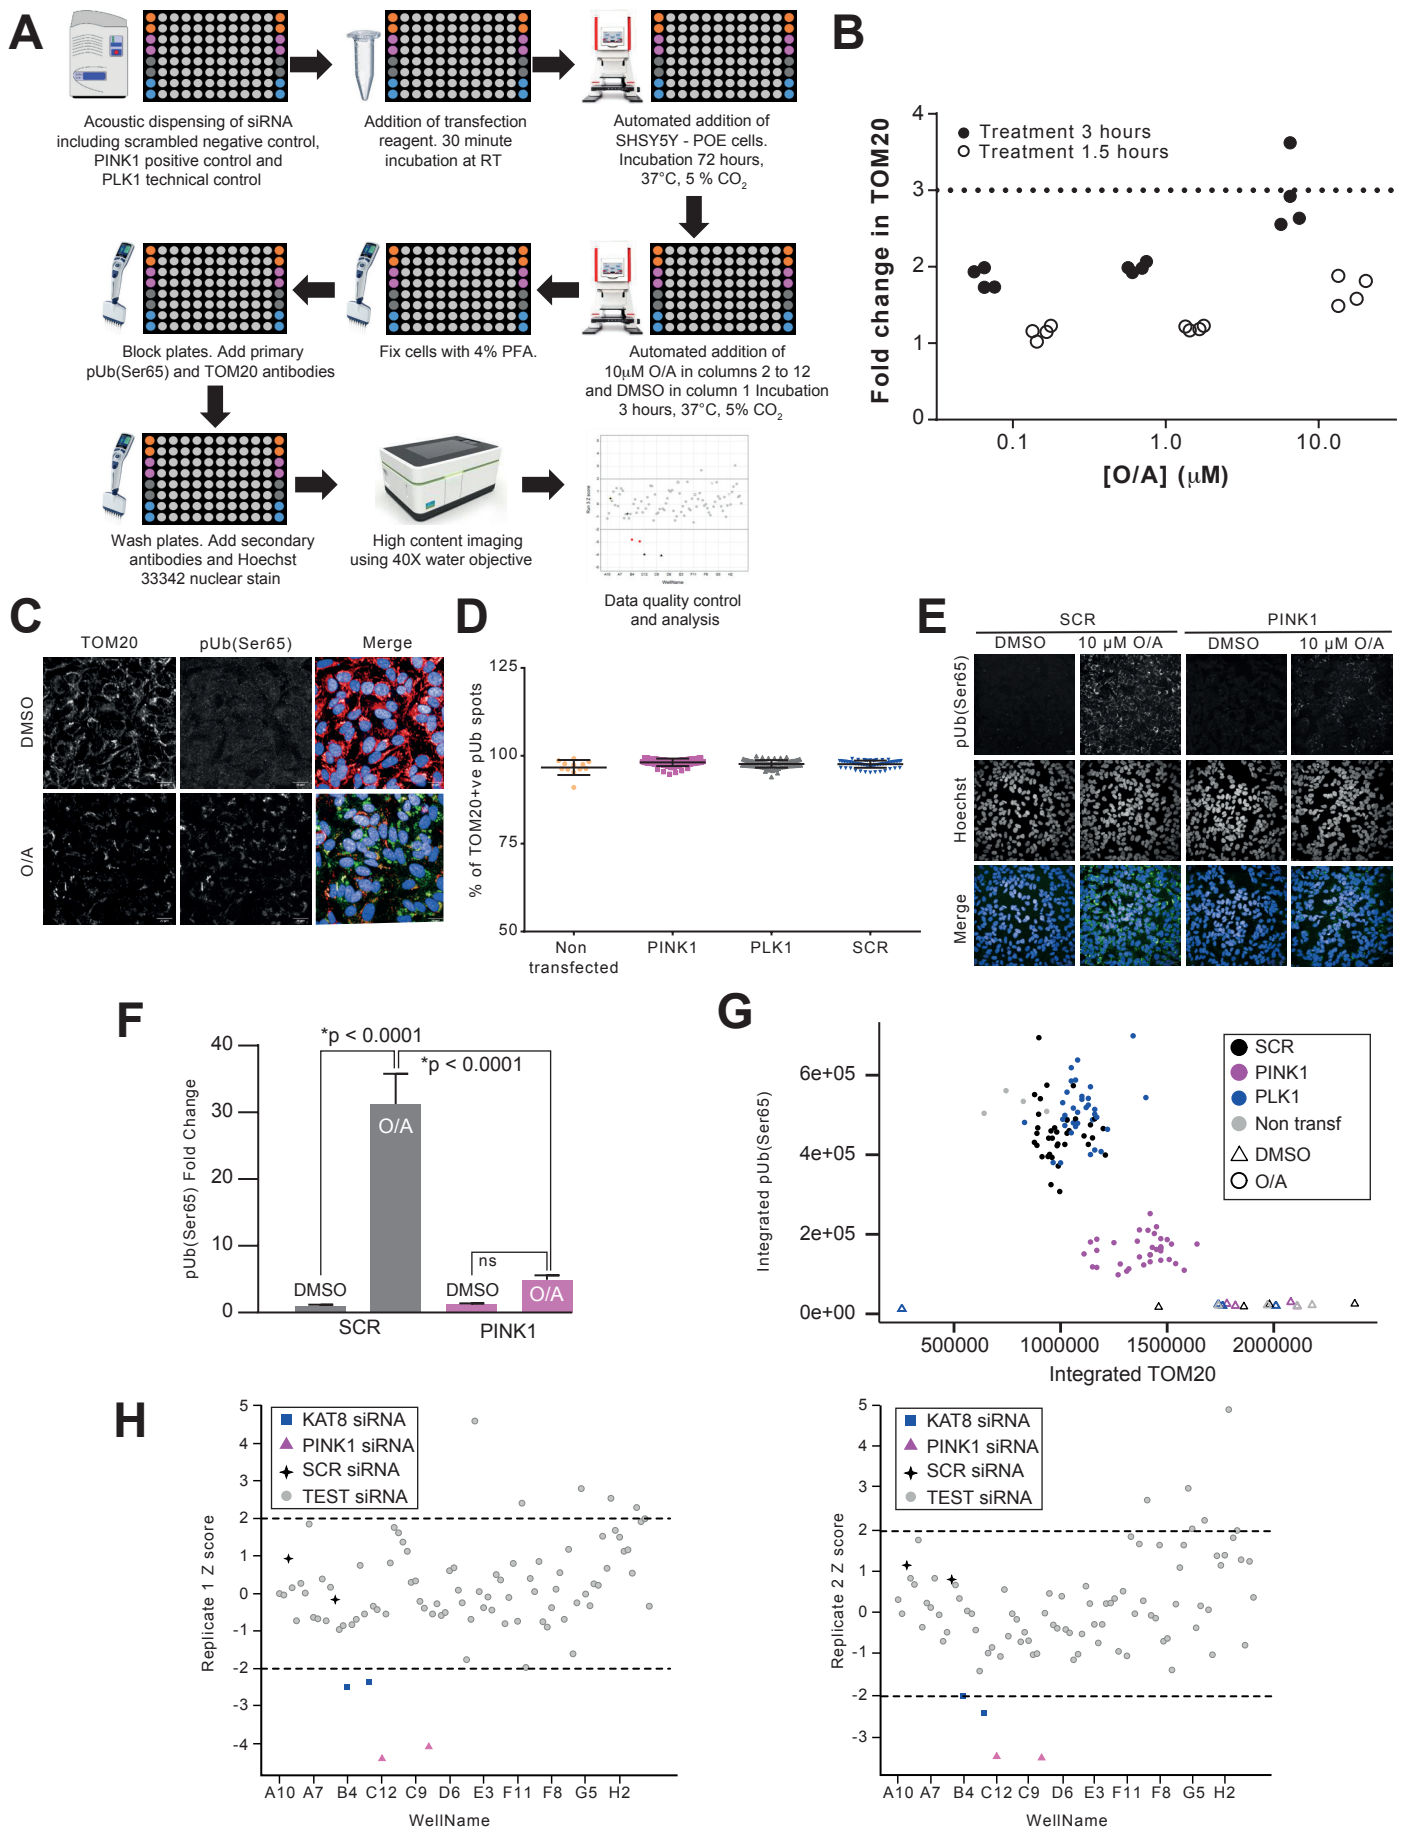

Extended Data Figure 1. High Content siRNA Screen for modulators of pUb(Ser65).



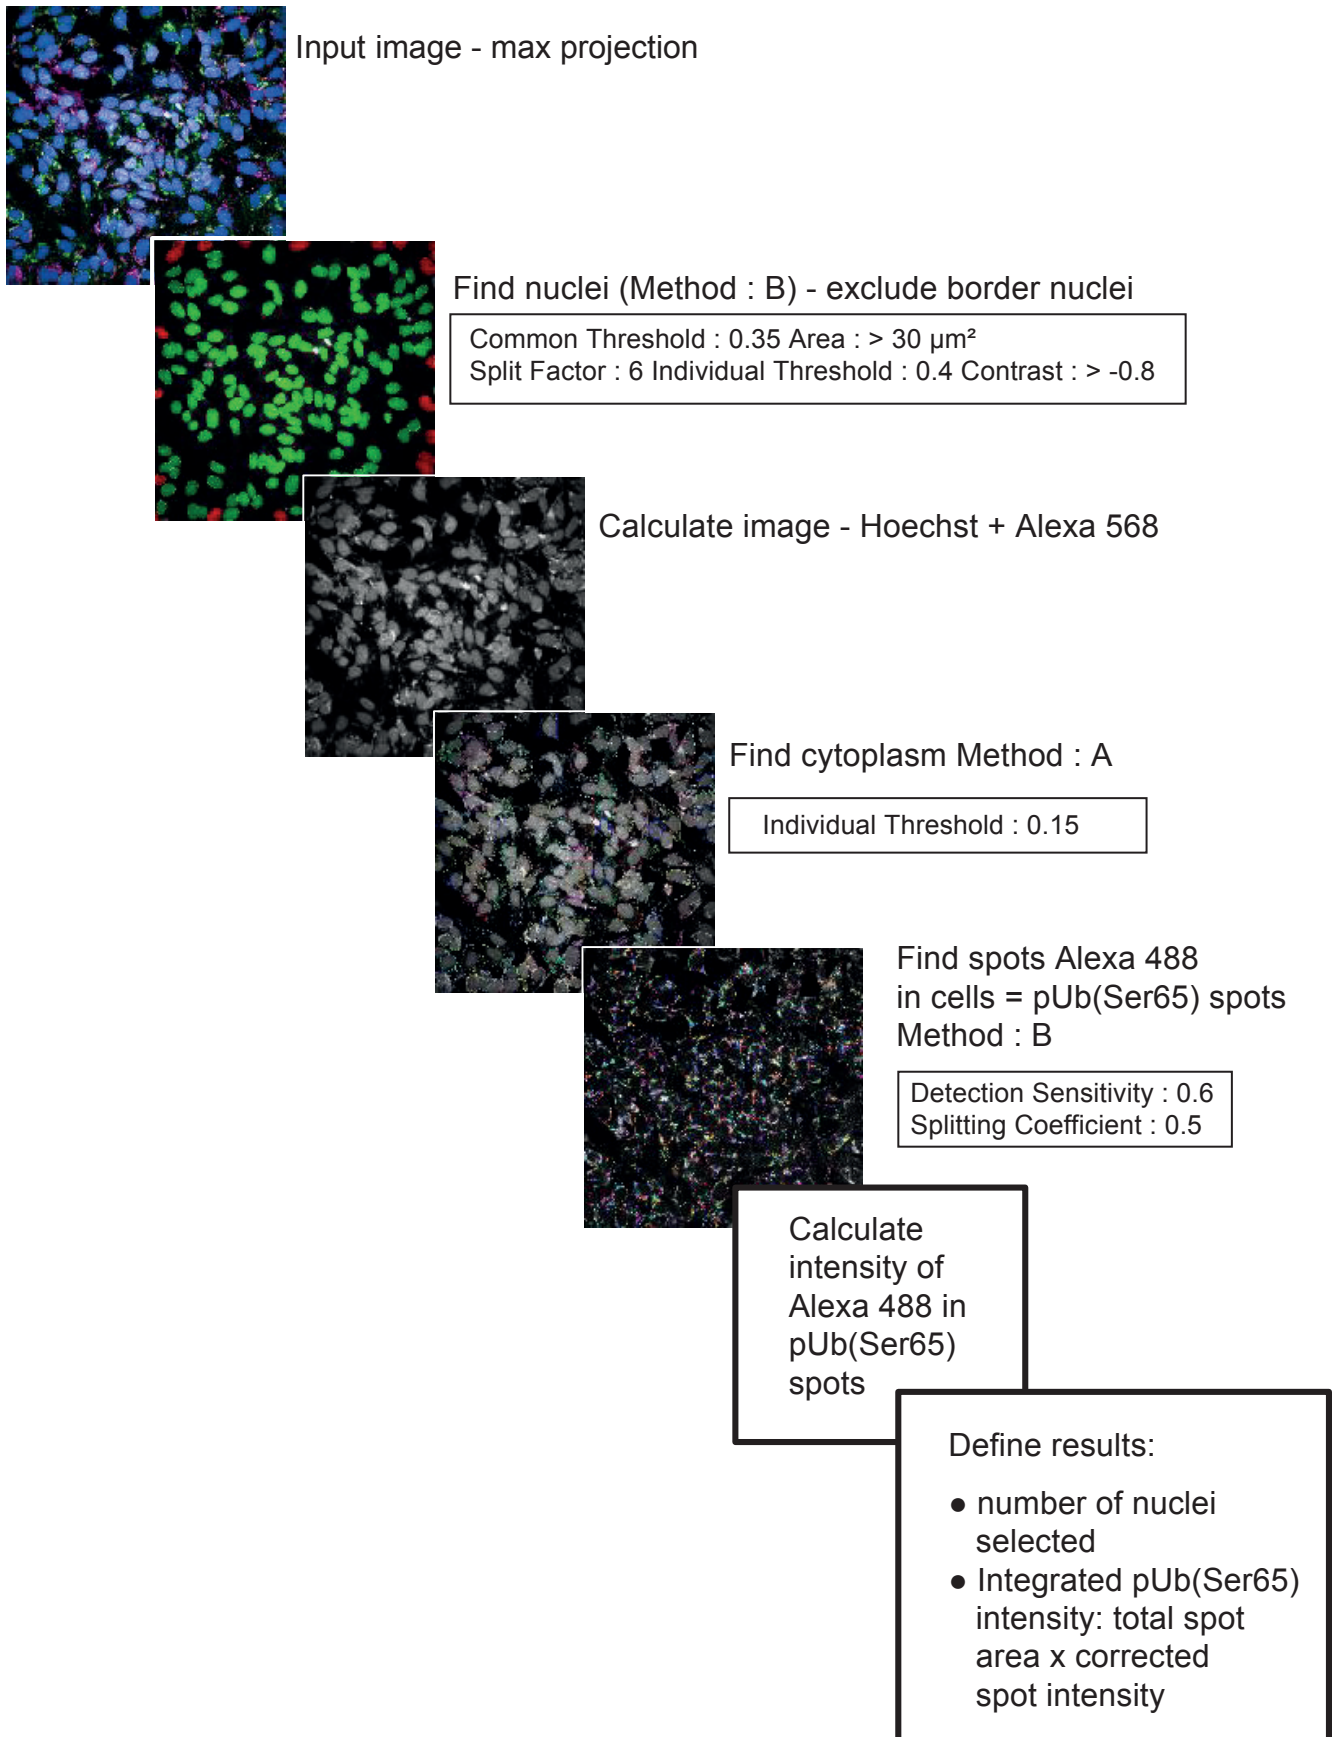

Extended Data Figure 2. Image processing workflow of the high content screen for O/A induced pUb(Ser65).

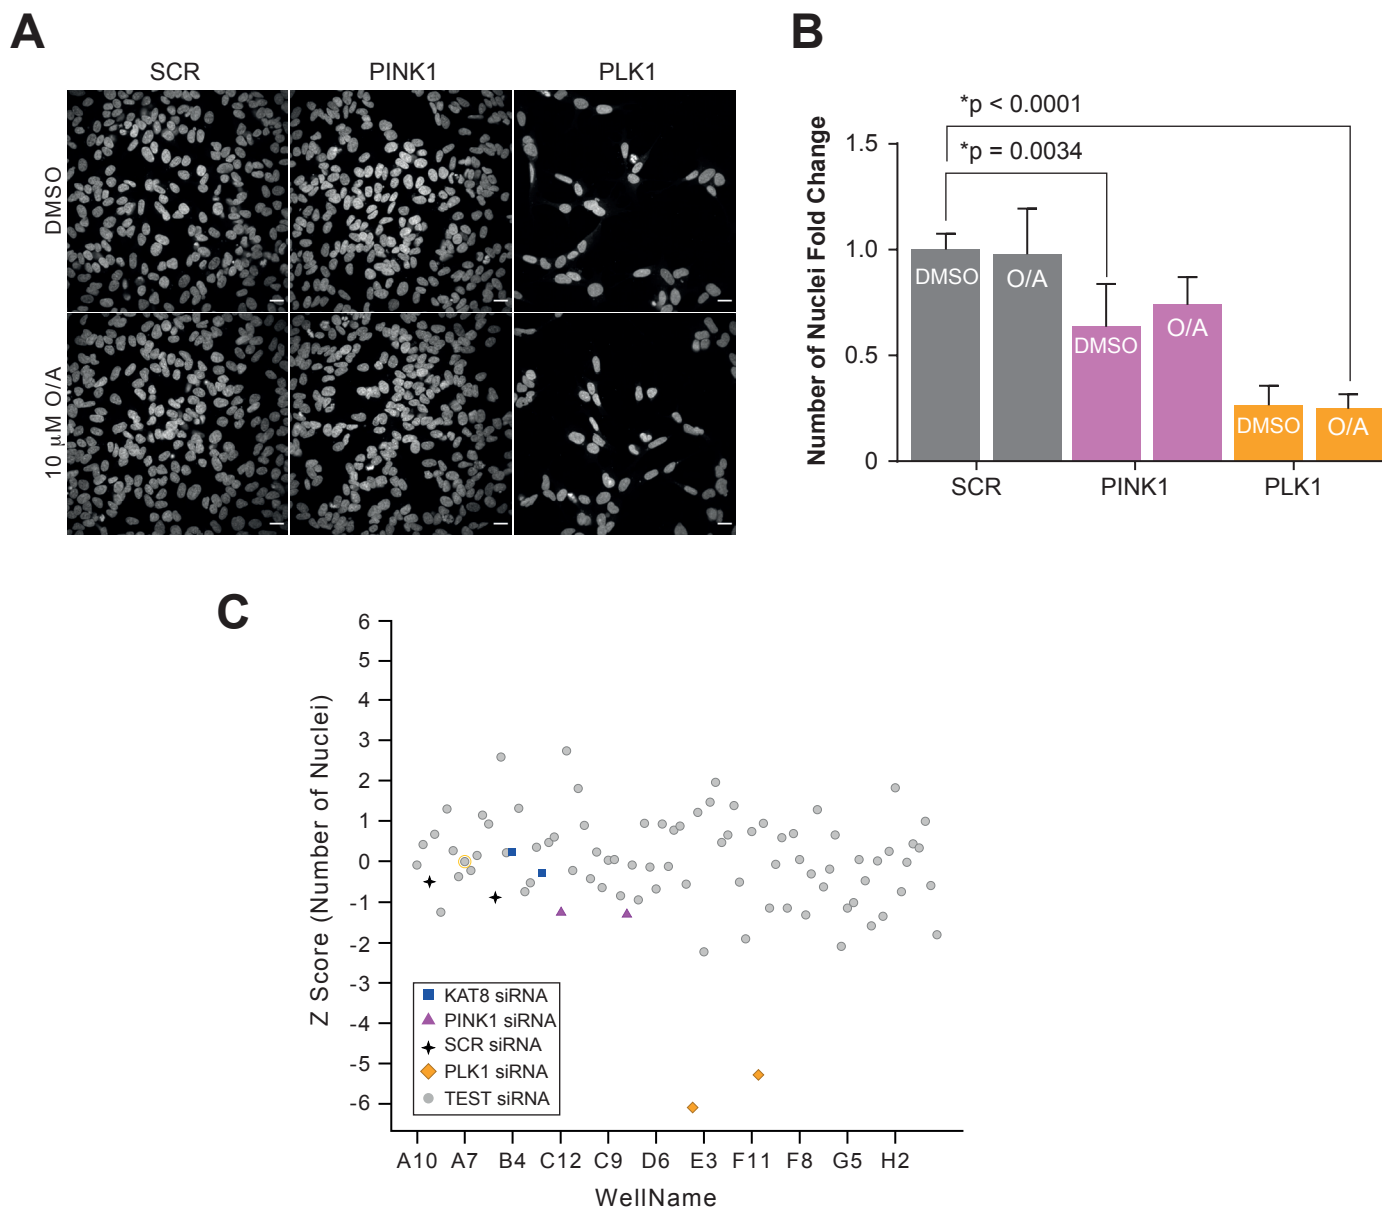

Extended Data Figure 3. KAT8 knockdown has no effect on cell viability.

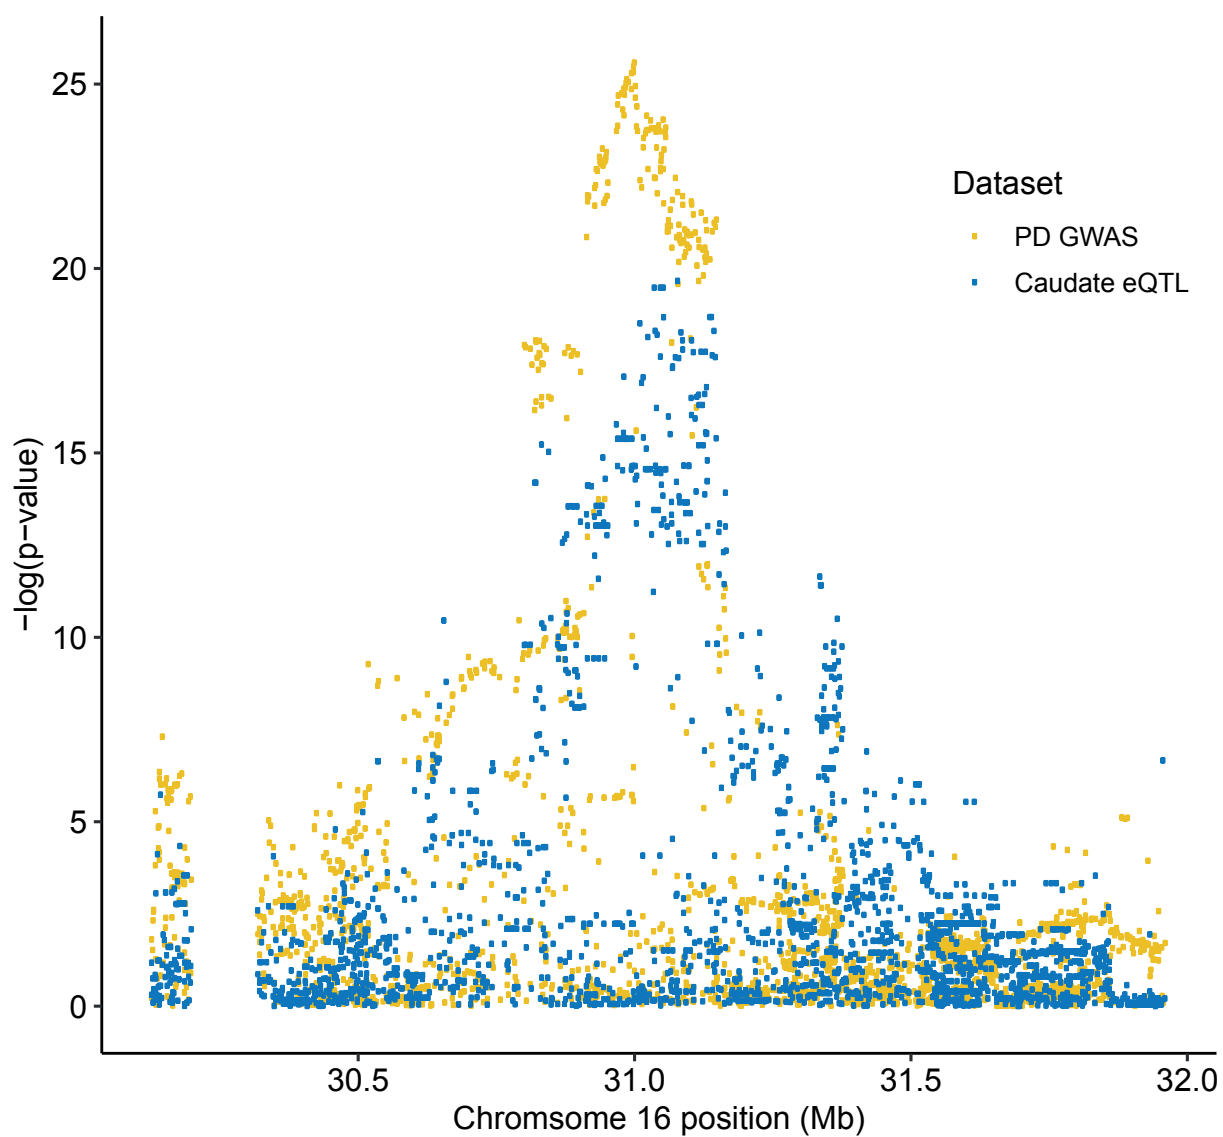

Extended Data Figure 4. KAT8 eQTLs colocalise with SNPs associated with PD risk.

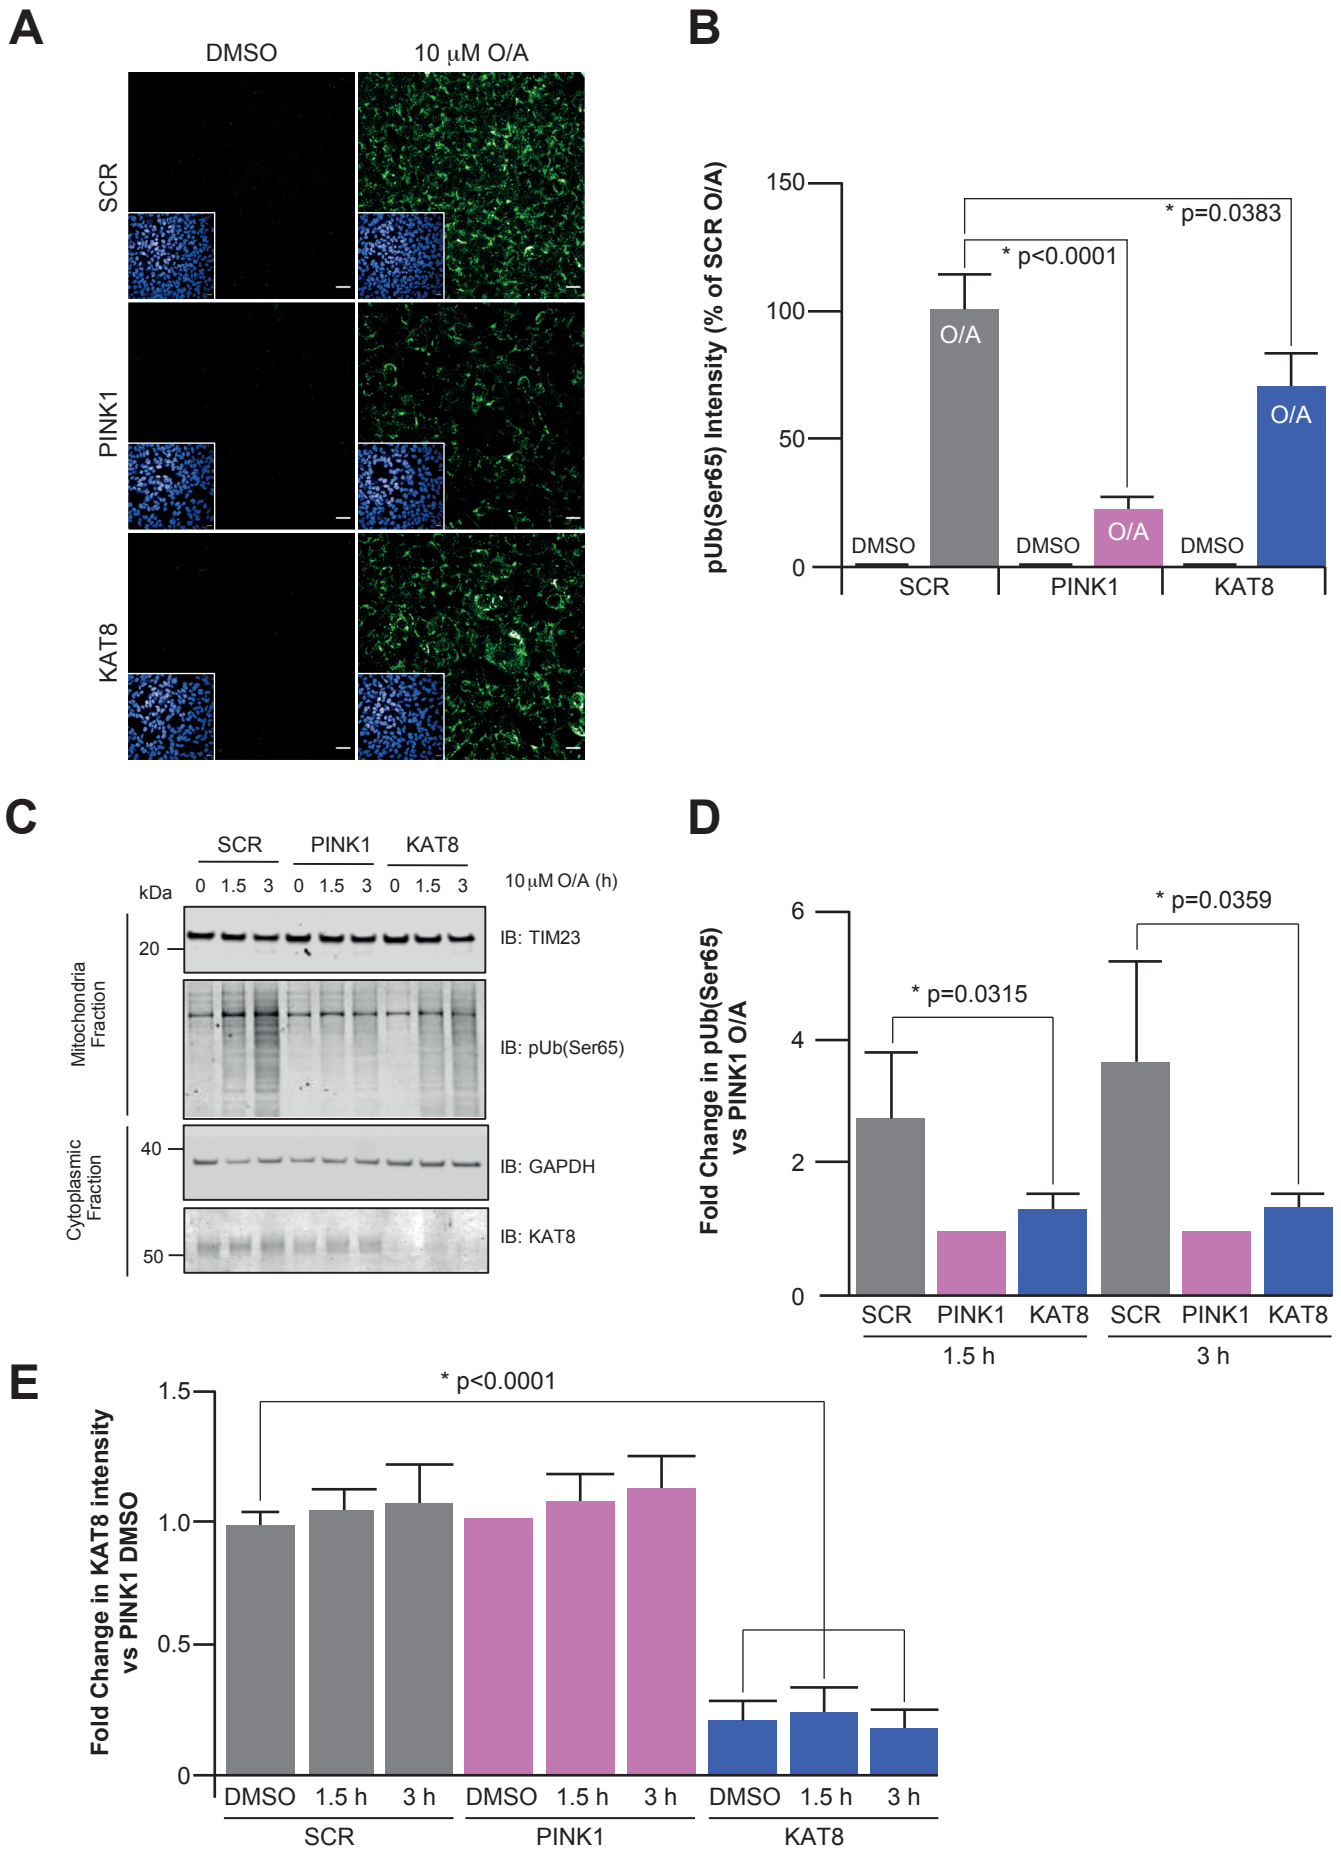

Extended Data Figure 5. KAT8 knockdown decreases pUb(Ser65) levels.

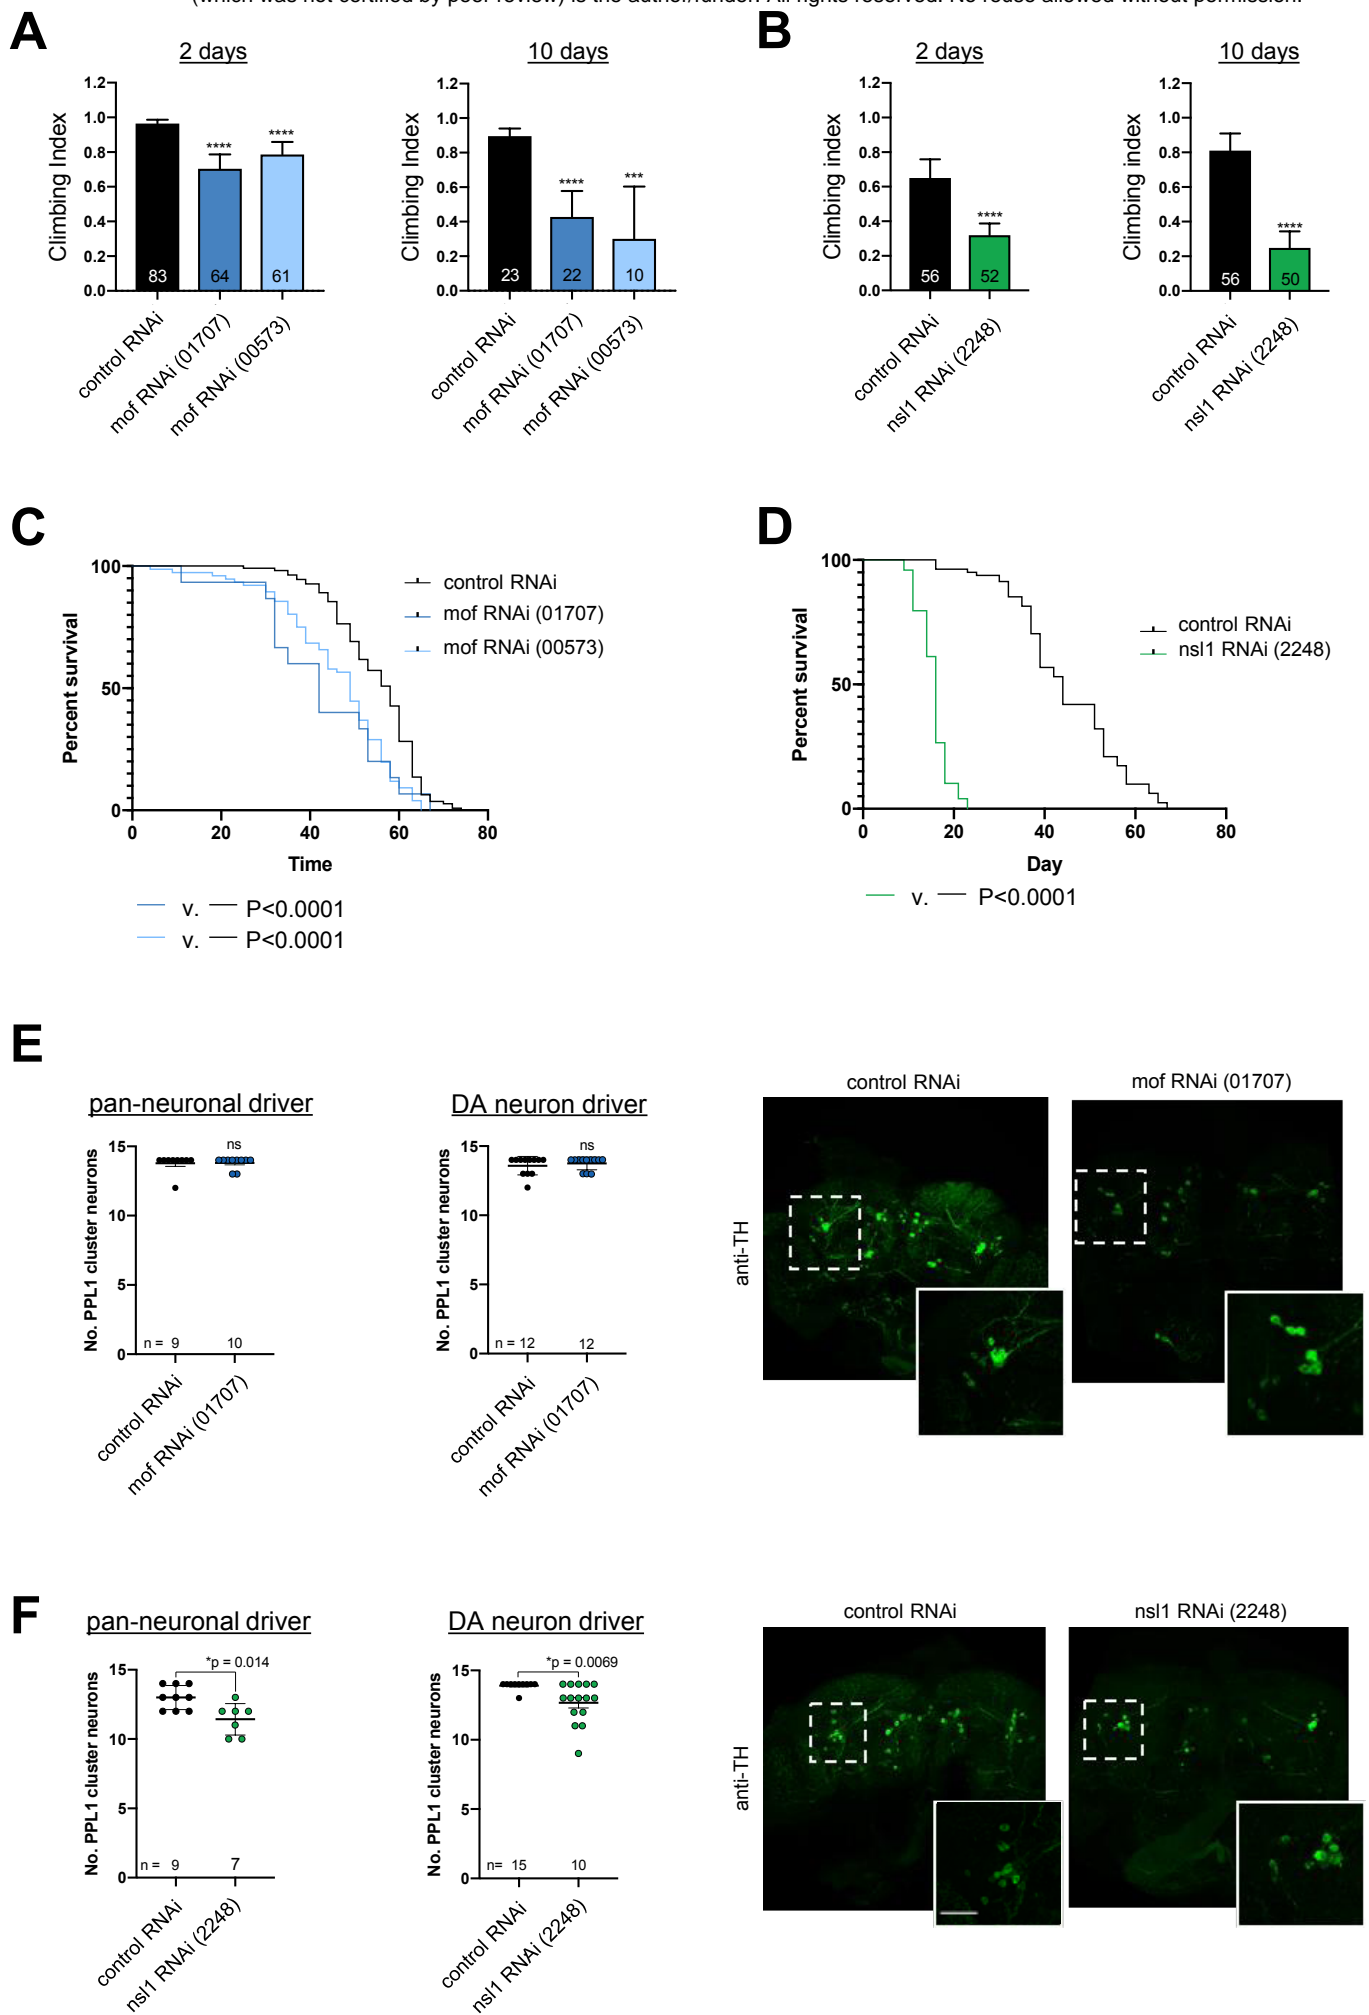

**Extended Data Figure 6. Neuronal loss of *mof* or *ns1* causes locomotor deficit, shortened lifespan and neurodegeneration.**

**A**

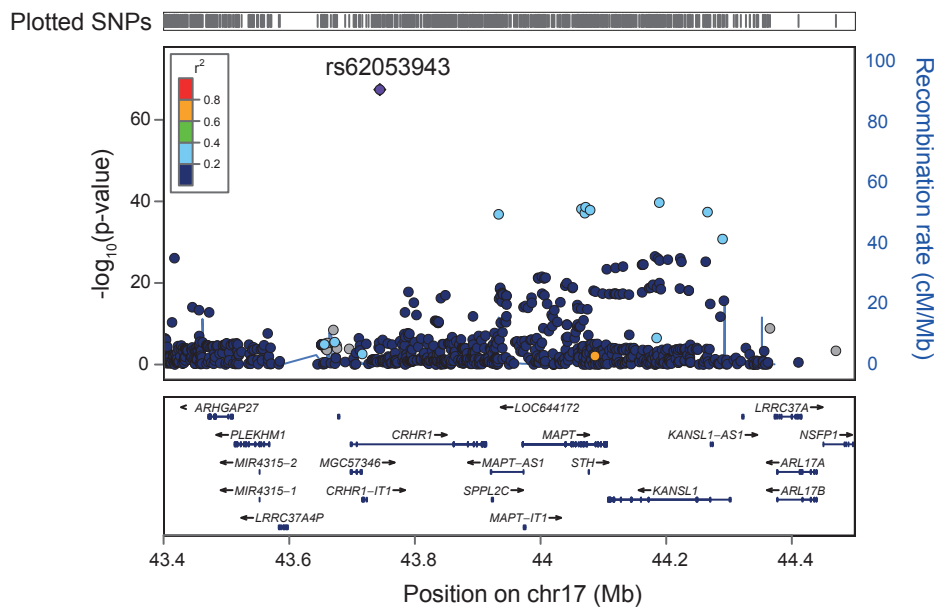

**B**

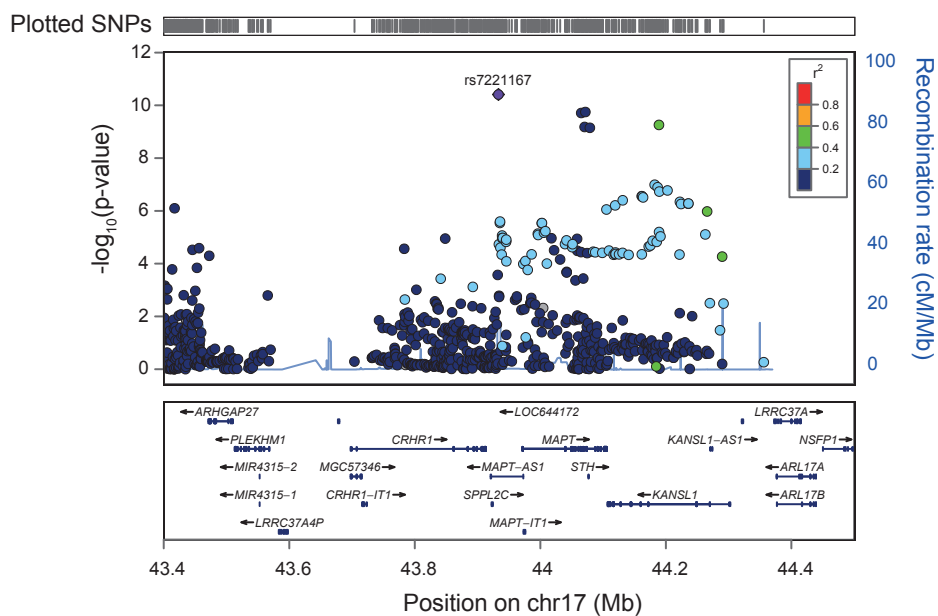

Extended Data Figure 7. Overview of the PD GWAS genetic signal at the *MAPT* locus.

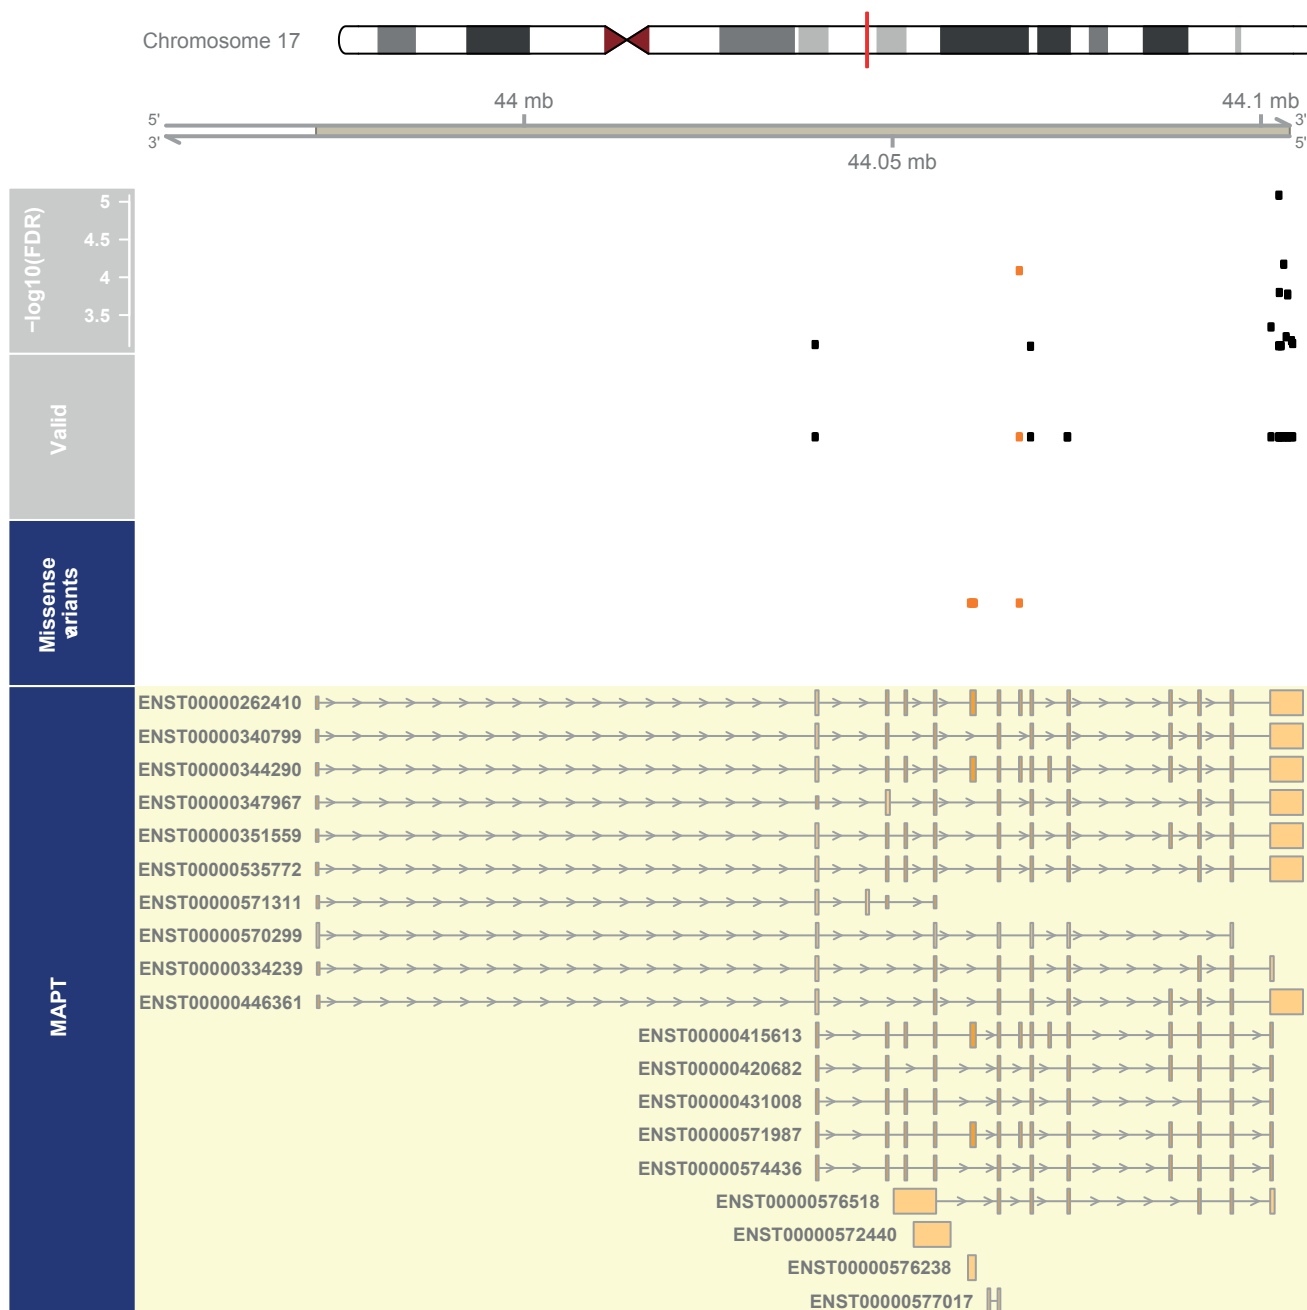

Extended Data Figure 8. ASE sites in *MAPT* in LD with the H1/H2 SNP.

| Gene    | ColB | ColG | PPI | GWAS | MPD | MLS |
|---------|------|------|-----|------|-----|-----|
| ATP13A2 |      |      |     |      | X   | X   |
| CCNT2   |      |      |     | X    |     |     |
| CD38    | X    | X    |     | X    |     |     |
| CTSB    | X    | X    | X   |      |     |     |
| DDR GK1 |      |      |     | X    |     |     |
| DGKQ    |      |      |     | X    |     |     |
| DJ1     |      |      |     |      | X   |     |
| DNAJC13 |      |      |     |      | X   |     |
| FBXO7   |      |      |     |      | X   |     |
| GALC    | X    |      |     | X    |     | X   |
| GBA     |      |      | X   |      | X   | X   |
| GP NMB  | X    | X    |     | X    |     |     |
| HSD3B7  |      | X    |     |      |     |     |
| IDUA    |      |      |     |      |     | X   |
| INPP5F  |      |      | X   |      |     |     |
| KAT8    |      | X    | X   | X    |     |     |
| KLHL7   |      | X    |     | X    |     |     |
| LRRK2   |      |      | X   | X    | X   |     |
| LSM7    | X    | X    |     | X    |     |     |
| MAPT    |      |      | X   | X    |     |     |
| NCKIPSD | X    | X    | X   | X    |     |     |
| NEK1    | X    |      |     |      |     |     |
| NSF     |      |      | X   |      |     |     |
| NUCKS1  |      | X    |     | X    |     |     |
| NUPL2   | X    | X    |     | X    |     |     |
| PDLIM2  |      | X    |     | X    |     |     |
| PM20D1  | X    |      |     |      |     |     |
| PRKN    |      |      |     |      | X   |     |
| RAB7L1  | X    | X    | X   |      |     |     |
| SH3GL2  |      |      | X   |      |     |     |
| SLC41A1 |      | X    |     | X    |     |     |
| SNCA    |      |      |     |      | X   |     |
| SPPL2B  | X    |      |     |      |     |     |
| STK39   |      |      |     | X    |     |     |
| VAMP4   | X    | X    |     |      |     |     |
| VPS35   |      |      |     |      | X   |     |
| WDR6    | X    | X    |     |      |     |     |
| ZNF646  |      |      |     | X    |     |     |

**Supplementary Table 1.  
Complete list of the 38  
genes screened in the  
high content screen.**

ColB = coloc analysis using Braineac, ColG = coloc analysis using GTEx, WPPINA = weighted protein-protein interaction network; GWAS = genes prioritised in PD-GWAS (Chang *et al*, 2017), MPD = Mendelian genes associated with PD, MLS = Mendelian genes associated with lysosomal storage disorders



|                          |                             |
|--------------------------|-----------------------------|
| eQTL_dataset             | GTEEx                       |
| sequencing_method        | RNA-seq                     |
| gene_symbol              | KAT8                        |
| tissue                   | Brain_Caudate_basal_ganglia |
| braineac_probe_id        | NA                          |
| nsnps                    | 2499                        |
| PPH0                     | 4.89E-10                    |
| PPH1                     | 1.76E-07                    |
| PPH2                     | 6.76E-04                    |
| PPH3                     | 0.242293929                 |
| PPH4                     | 0.75702972                  |
| PD_top_snp               | chr16:31000809              |
| coloc_top_snp            | chr16:31048079              |
| coloc_SNP_PPH4           | 0.08637809                  |
| coloc_eQTL_effect_allele | T                           |
| coloc_eQTL_other_allele  | C                           |
| coloc_eQTL_beta          | -0.358743                   |
| coloc_eQTL_SE            | 0.0563187                   |
| coloc_eQTL_Freq1         | NA                          |
| coloc_eQTL_p_val         | 3.49E-09                    |
| coloc_PD_AI1             | C                           |
| coloc_PD_AI2             | T                           |
| coloc_PD_beta            | -0.0739                     |
| coloc_PD_SE              | 0.0115                      |
| coloc_PD_Freq1           | 0.5972                      |
| coloc_PD_p_val           | 1.38E-10                    |

**Supplementary Table 2. Results of the Colocalization analysis for KAT8.**

PD\_top\_snp = lead SNP in the PD GWAS, coloc\_top\_snp = Most likely SNP responsible for the colocalization signal, coloc\_SNP\_PPH4 = posterior probability of coloc top SNP being the true SNP responsible for the colocalization signal.

|                     |                   |                                            |                                  |                               |                   |                       |
|---------------------|-------------------|--------------------------------------------|----------------------------------|-------------------------------|-------------------|-----------------------|
| <b>ID</b>           | KAT8              | KAT8                                       | KAT8                             | KAT8                          | KAT8              | KAT8                  |
| <b>CHR</b>          | 16                | 16                                         | 16                               | 16                            | 16                | 16                    |
| <b>P0</b>           | 31127075          | 31127075                                   | 31127075                         | 31127075                      | 31128984          | 31127075              |
| <b>P1</b>           | 31142714          | 31142714                                   | 31142714                         | 31142714                      | 31142714          | 31142714              |
| <b>HSQ</b>          | 0.144             | 0.191                                      | 0.121                            | 0.156                         | 0.0641            | 0.207                 |
| <b>BEST.GWAS.ID</b> | rs9938550         | rs9938550                                  | rs9938550                        | rs9938550                     | rs2305880         | rs9938550             |
| <b>BEST.GWAS.Z</b>  | -6.82             | -6.82                                      | -6.82                            | -6.82                         | -6.84             | -6.82                 |
| <b>EQTL.ID</b>      | rs8046707         | rs1549293                                  | rs2855475                        | rs12597511                    | rs749767          | rs4527034             |
| <b>EQTL.R2</b>      | 0.13718           | 0.129562                                   | 0.227501                         | 0.19827                       | 0.074695          | 0.00998               |
| <b>EQTL.Z</b>       | -4.26             | -4.12                                      | -4.58                            | -4.61                         | -6.05             | -4.23                 |
| <b>EQTL.GWAS.Z</b>  | 6.28455           | 6.13675                                    | 6.1538                           | 6.178                         | 6.06897           | 6.1724                |
| <b>NSNP</b>         | 240               | 240                                        | 240                              | 240                           | 248               | 240                   |
| <b>NWGT</b>         | 3                 | 4                                          | 3                                | 1                             | 1                 | 9                     |
| <b>MODEL</b>        | lasso             | lasso                                      | lasso                            | lasso                         | lasso             | lasso                 |
| <b>MODEL.CVR2</b>   | 0.103             | 0.181407                                   | 0.17535                          | 0.17222                       | 0.07213           | 0.04964               |
| <b>MODEL.CV.PV</b>  | 0.000889          | 1.37E-05                                   | 2.91E-05                         | 2.56E-05                      | 3.95E-09          | 0.0139                |
| <b>TWAS.Z</b>       | -6.6932           | -6.2068                                    | -6.1876                          | -6.178                        | -6.069            | -6.04195              |
| <b>TWAS.P</b>       | 2.18E-11          | 5.41E-10                                   | 6.11E-10                         | 6.49E-10                      | 1.29E-09          | 1.52E-09              |
| <b>FDR</b>          | 2.09E-09          | 4.84E-08                                   | 7.15E-08                         | 6.79E-08                      | 4.37E-07          | 2.36E-07              |
| <b>Region</b>       | GTEx_Brain_Cortex | GTEx_Brain_Nucleus_accumbens_basal_ganglia | GTEx_Brain_Cerebellar_Hemisphere | GTEx_Brain_Frontal_Cortex_BA9 | CMC BRAIN .RNASEQ | GTEx_Brain_Cerebellum |

Supplementary Table 3. Results of the TWAS analysis for KAT8.

| <b>KAT name</b> | <b>Alternative name(s)</b> |
|-----------------|----------------------------|
| KAT1            | HAT1                       |
| KAT2A           | GCN5                       |
| KAT2B           | PCAF                       |
| KAT3A           | CREBBP, CBP                |
| KAT3B           | EP300                      |
| KAT4            | TAF1, TFII250              |
| KAT5            | TIP60                      |
| KAT6A           | MOZ, MYST3                 |
| KAT6B           | MORF, MYST4                |
| KAT7            | HBO1, MYST2                |
| KAT8            | MOF, MYST1                 |
| KAT9            | ELP3                       |
| KAT12           | GTF3C4, TFIIC90            |
| KAT13A          | NCOA1, SRC1                |
| KAT13B          | NCOA3, SRC3, ACTR          |
| KAT13C          | NCOA2                      |
| KAT13D          | CLOCK                      |
|                 | ACAT1                      |
|                 | ATAT1                      |
|                 | ATF2                       |
|                 | BLOC1S1 (GCN5L1)           |
|                 | NAT10                      |

**Supplementary Table 4. Complete list of the 22 KATs screened in the high content screen. (See Fig 3E)**

Within each row, compare columns (simple effects within rows)

Number of families 8  
 Number of comparisons per family 3

| Dunnett's multiple comparisons test | Mean Diff. | 95.00% CI of diff. | Significant? | Summary | Adjusted P Value |
|-------------------------------------|------------|--------------------|--------------|---------|------------------|
| DMSO                                |            |                    |              |         |                  |
| SCR vs. KAT8                        | 0          | -14.19 to 14.19    | No           | ns      | >0.9999          |
| SCR vs. KANSL1                      | 0          | -14.19 to 14.19    | No           | ns      | >0.9999          |
| SCR vs. PINK1                       | 0          | -14.19 to 14.19    | No           | ns      | >0.9999          |
| 1 h                                 |            |                    |              |         |                  |
| SCR vs. KAT8                        | 21         | 6.807 to 35.19     | Yes          | **      | 0.0017           |
| SCR vs. KANSL1                      | 30         | 15.81 to 44.19     | Yes          | ****    | <0.0001          |
| SCR vs. PINK1                       | 38         | 23.81 to 52.19     | Yes          | ****    | <0.0001          |
| 2 h                                 |            |                    |              |         |                  |
| SCR vs. KAT8                        | 30         | 15.81 to 44.19     | Yes          | ****    | <0.0001          |
| SCR vs. KANSL1                      | 53         | 38.81 to 67.19     | Yes          | ****    | <0.0001          |
| SCR vs. PINK1                       | 71         | 56.81 to 85.19     | Yes          | ****    | <0.0001          |
| 3 h                                 |            |                    |              |         |                  |
| SCR vs. KAT8                        | 33         | 18.81 to 47.19     | Yes          | ****    | <0.0001          |
| SCR vs. KANSL1                      | 51         | 36.81 to 65.19     | Yes          | ****    | <0.0001          |
| SCR vs. PINK1                       | 73         | 58.81 to 87.19     | Yes          | ****    | <0.0001          |
| 4 h                                 |            |                    |              |         |                  |
| SCR vs. KAT8                        | 15         | 0.8065 to 29.19    | Yes          | *       | 0.0355           |
| SCR vs. KANSL1                      | 28         | 13.81 to 42.19     | Yes          | ****    | <0.0001          |
| SCR vs. PINK1                       | 49         | 34.81 to 63.19     | Yes          | ****    | <0.0001          |
| 5 h                                 |            |                    |              |         |                  |
| SCR vs. KAT8                        | 9          | -5.193 to 23.19    | No           | ns      | 0.307            |
| SCR vs. KANSL1                      | 21         | 6.807 to 35.19     | Yes          | **      | 0.0017           |
| SCR vs. PINK1                       | 39         | 24.81 to 53.19     | Yes          | ****    | <0.0001          |
| 6 h                                 |            |                    |              |         |                  |
| SCR vs. KAT8                        | 14         | -0.1935 to 28.19   | No           | ns      | 0.0542           |
| SCR vs. KANSL1                      | 24         | 9.807 to 38.19     | Yes          | ***     | 0.0003           |
| SCR vs. PINK1                       | 42         | 27.81 to 56.19     | Yes          | ****    | <0.0001          |
| 7 h                                 |            |                    |              |         |                  |
| SCR vs. KAT8                        | 19         | 4.807 to 33.19     | Yes          | **      | 0.0051           |
| SCR vs. KANSL1                      | 23         | 8.807 to 37.19     | Yes          | ***     | 0.0005           |
| SCR vs. PINK1                       | 40         | 25.81 to 54.19     | Yes          | ****    | <0.0001          |

Supplementary Table 5. p-values for Figure 6B.

| hetSNP      | Sample ID | Read count | Allele | Ens.Alt | Individual ID | Tissue |
|-------------|-----------|------------|--------|---------|---------------|--------|
| 17:44108355 | A653_043  | 47         | A      | A       | 004_06        | SNIG   |
| 17:44108355 | A653_043  | 20         | G      | A       | 004_06        | SNIG   |
| 17:44108355 | A653_441  | 69         | A      | A       | 032_09        | PUTM   |
| 17:44108355 | A653_441  | 0          | G      | A       | 032_09        | PUTM   |
| 17:44159849 | A653_031  | 2          | C      | C       | 024_09        | PUTM   |
| 17:44159849 | A653_031  | 23         | T      | C       | 024_09        | PUTM   |
| 17:44159849 | A653_719  | 58         | C      | C       | 035_09        | SNIG   |
| 17:44159849 | A653_719  | 26         | T      | C       | 035_09        | SNIG   |
| 17:44248769 | A653_093  | 36         | C      | C       | 004_08        | SNIG   |
| 17:44248769 | A653_093  | 4          | T      | C       | 004_08        | SNIG   |
| 17:44248769 | A653_184  | 30         | C      | C       | 013_09        | PUTM   |
| 17:44248769 | A653_184  | 7          | T      | C       | 013_09        | PUTM   |
| 17:44248769 | A653_326  | 26         | C      | C       | 017_09        | PUTM   |
| 17:44248769 | A653_326  | 3          | T      | C       | 017_09        | PUTM   |
| 17:44248769 | A653_617  | 22         | C      | C       | 029_09        | SNIG   |
| 17:44248769 | A653_617  | 0          | T      | C       | 029_09        | SNIG   |
| 17:44248769 | A653_679  | 23         | C      | C       | 030_06        | PUTM   |
| 17:44248769 | A653_679  | 3          | T      | C       | 030_06        | PUTM   |
| 17:44248769 | A653_753  | 43         | C      | C       | 029_09        | PUTM   |
| 17:44248769 | A653_753  | 10         | T      | C       | 029_09        | PUTM   |
| 17:44248769 | A653_794  | 24         | C      | C       | 036_09        | SNIG   |
| 17:44248769 | A653_794  | 4          | T      | C       | 036_09        | SNIG   |
| 17:44248814 | A653_043  | 10         | A      | A       | 004_06        | SNIG   |
| 17:44248814 | A653_043  | 0          | G      | A       | 004_06        | SNIG   |
| 17:44248814 | A653_326  | 19         | A      | A       | 017_09        | PUTM   |
| 17:44248814 | A653_326  | 3          | G      | A       | 017_09        | PUTM   |
| 17:44248814 | A653_617  | 12         | A      | A       | 029_09        | SNIG   |
| 17:44248814 | A653_617  | 0          | G      | A       | 029_09        | SNIG   |
| 17:44248814 | A653_679  | 19         | A      | A       | 030_06        | PUTM   |
| 17:44248814 | A653_679  | 2          | G      | A       | 030_06        | PUTM   |
| 17:44248814 | A653_753  | 25         | A      | A       | 029_09        | PUTM   |
| 17:44248814 | A653_753  | 5          | G      | A       | 029_09        | PUTM   |
| 17:44248814 | A653_950  | 28         | A      | A       | 006_10        | SNIG   |
| 17:44248814 | A653_950  | 8          | G      | A       | 006_10        | SNIG   |

**Supplementary Table 6. Summary of the results of ASE analysis across the *KANSL1* gene.**

| Column name             | Description                                                                 |
|-------------------------|-----------------------------------------------------------------------------|
| hetSNP                  | Heterozygous SNP with average read depth >15 across samples                 |
| Avg.Reads.all.samples   | Average read depth across all samples                                       |
| min.FDR                 | Minimum false discovery rate across the samples                             |
| Allele1                 | Allele 1 for the hetSNP                                                     |
| Allele2                 | Allele 2 for the hetSNP                                                     |
| ens.alt                 | Ensembl alternate allele                                                    |
| symbol                  | Gene name obtained using the variant effect predictor tool (VEP)            |
| most.severe.consequence | Most severe of all observed consequence types reported for the hetSNP (VEP) |
| ASE                     | Indicates ASE = 'Y' if min.FDR < 0.05, 'N' if min.FDR >=0.05                |

**The following column details were from obtained from LDProxy (<https://ldlink.nci.nih.gov/>)**

|         |                                                             |
|---------|-------------------------------------------------------------|
| RSID    | Identifier for the hetSNP                                   |
| Alleles | SNP alleles                                                 |
| MAF     | Minor allele frequency                                      |
| Dprime  | Indicator of allelic segregation for two genetic variants   |
| R2      | Measure of correlation of alleles for two genetic variants. |

| hetsNP      | Sample ID | Read count | Allele | Ens.alt | Individual ID | Tissue | hetsNP      | Sample ID | Read count | Allele | Ens.alt | Individual ID | Tissue |
|-------------|-----------|------------|--------|---------|---------------|--------|-------------|-----------|------------|--------|---------|---------------|--------|
| 17_44101563 | A653_031  | 18         | C      | C       | 024_09        | PUTM   | 17_44101563 | A653_441  | 0          | T      | C       | 032_09        | PUTM   |
| 17_44102638 | A653_031  | 3          | T      | C       | 024_09        | PUTM   | 17_44102638 | A653_441  | 0          | A      | G       | 032_09        | PUTM   |
| 17_44102889 | A653_031  | 5          | C      | C       | 024_09        | PUTM   | 17_44102889 | A653_441  | 197        | G      | C       | 032_09        | PUTM   |
| 17_44102889 | A653_031  | 21         | G      | C       | 024_09        | PUTM   | 17_44102889 | A653_441  | 77         | C      | C       | 032_09        | PUTM   |
| 17_44103616 | A653_031  | 23         | C      | T       | 024_09        | PUTM   | 17_44103616 | A653_441  | 0          | G      | C       | 032_09        | PUTM   |
| 17_44103616 | A653_031  | 0          | T      | C       | 024_09        | PUTM   | 17_44103296 | A653_441  | 112        | C      | C       | 032_09        | PUTM   |
| 17_44103825 | A653_031  | 11         | C      | C       | 024_09        | PUTM   | 17_44103296 | A653_441  | 0          | T      | C       | 032_09        | PUTM   |
| 17_44103825 | A653_031  | 31         | T      | C       | 024_09        | PUTM   | 17_44103825 | A653_441  | 75         | C      | C       | 032_09        | PUTM   |
| 17_44104509 | A653_043  | 43         | C      | C       | 004_06        | SNIG   | 17_44103825 | A653_441  | 0          | T      | C       | 032_09        | PUTM   |
| 17_44104509 | A653_043  | 82         | T      | C       | 004_06        | SNIG   | 17_44103826 | A653_441  | 74         | A      | A       | 032_09        | PUTM   |
| 17_44102804 | A653_056  | 85         | C      | C       | 015_07        | PUTM   | 17_44103826 | A653_441  | 0          | G      | A       | 032_09        | PUTM   |
| 17_44102804 | A653_056  | 138        | T      | C       | 015_07        | PUTM   | 17_44067400 | A653_627  | 9          | T      | C       | 033_09        | PUTM   |
| 17_44104343 | A653_093  | 84         | A      | C       | 004_08        | SNIG   | 17_44067400 | A653_627  | 30         | C      | C       | 033_09        | PUTM   |
| 17_44104343 | A653_093  | 34         | C      | C       | 004_08        | SNIG   | 17_44068924 | A653_627  | 39         | A      | A       | 033_09        | PUTM   |
| 17_44102889 | A653_171  | 37         | C      | C       | 040_08        | SNIG   | 17_44068924 | A653_627  | 72         | C      | A       | 033_09        | PUTM   |
| 17_44102889 | A653_171  | 87         | G      | C       | 040_08        | SNIG   | 17_44102933 | A653_627  | 118        | G      | C       | 033_09        | PUTM   |
| 17_44039691 | A653_177  | 118        | G      | G       | 040_08        | SNIG   | 17_44102933 | A653_627  | 73         | C      | C       | 033_09        | PUTM   |
| 17_44039691 | A653_177  | 184        | A      | G       | 015_07        | SNIG   | 17_44104343 | A653_627  | 68         | T      | A       | 033_09        | PUTM   |
| 17_44104343 | A653_177  | 35         | C      | C       | 015_07        | SNIG   | 17_44104343 | A653_627  | 35         | C      | C       | 033_09        | PUTM   |
| 17_44104343 | A653_177  | 74         | A      | C       | 015_07        | SNIG   | 17_44104509 | A653_627  | 92         | T      | T       | 033_09        | PUTM   |
| 17_44102889 | A653_205  | 30         | G      | C       | 040_08        | PUTM   | 17_44104509 | A653_627  | 53         | C      | C       | 033_09        | PUTM   |
| 17_44102889 | A653_205  | 64         | G      | C       | 040_08        | PUTM   | 17_44102889 | A653_643  | 24         | G      | C       | 017_08        | PUTM   |
| 17_44102889 | A653_225  | 70         | C      | C       | 004_08        | PUTM   | 17_44102889 | A653_679  | 54         | G      | C       | 030_06        | PUTM   |
| 17_44102889 | A653_243  | 37         | C      | C       | 021_09        | SNIG   | 17_44104509 | A653_679  | 11         | C      | C       | 030_06        | PUTM   |
| 17_44104343 | A653_243  | 71         | A      | C       | 021_09        | SNIG   | 17_44104509 | A653_679  | 40         | T      | T       | 030_06        | PUTM   |
| 17_44102889 | A653_283  | 47         | A      | C       | 017_09        | SNIG   | 17_44067400 | A653_719  | 13         | T      | C       | 035_09        | SNIG   |
| 17_44102889 | A653_283  | 90         | G      | C       | 017_09        | SNIG   | 17_44067400 | A653_719  | 51         | C      | C       | 035_09        | SNIG   |
| 17_44102889 | A653_283  | 79         | A      | C       | 017_09        | SNIG   | 17_44102889 | A653_719  | 45         | G      | C       | 035_09        | SNIG   |
| 17_44102865 | A653_283  | 41         | C      | C       | 017_09        | SNIG   | 17_44102889 | A653_738  | 84         | G      | C       | 035_09        | SNIG   |
| 17_44104343 | A653_283  | 42         | C      | C       | 017_09        | SNIG   | 17_44067400 | A653_738  | 23         | C      | C       | 036_09        | PUTM   |
| 17_44104343 | A653_283  | 84         | A      | C       | 017_09        | SNIG   | 17_44067400 | A653_753  | 24         | C      | C       | 029_09        | PUTM   |
| 17_44104509 | A653_283  | 85         | T      | C       | 017_09        | SNIG   | 17_44067400 | A653_753  | 6          | T      | T       | 029_09        | PUTM   |
| 17_44104509 | A653_283  | 50         | C      | C       | 038_08        | PUTM   | 17_44101563 | A653_763  | 33         | C      | C       | 034_08        | PUTM   |
| 17_44067400 | A653_288  | 12         | T      | T       | 038_08        | PUTM   | 17_44101563 | A653_763  | 0          | T      | C       | 034_08        | PUTM   |
| 17_44067400 | A653_326  | 73         | T      | T       | 017_09        | PUTM   | 17_44103296 | A653_763  | 91         | T      | T       | 034_08        | PUTM   |
| 17_44104509 | A653_326  | 33         | C      | C       | 017_09        | PUTM   | 17_44068924 | A653_794  | 39         | A      | A       | 036_09        | SNIG   |
| 17_44101563 | A653_441  | 34         | C      | C       | 032_09        | PUTM   | 17_44068924 | A653_794  | 73         | G      | A       | 036_09        | SNIG   |

**Column name**

hetsNP Heterozygous SNP with average read depth > 15 across samples

Avg Reads: all: samples Average read depth across all samples

min.FDR Minimum false discovery rate across the samples

Allele1 Allele 1 for the hetsNP

Allele2 Allele 2 for the hetsNP

ens.alt Ensembl alternate allele

symbol Gene name obtained using the variant effect predictor tool (VEP)

most:severe:consequen Most severe of all observed consequence types reported for the hetsNP (VEP)

ASE Indicates ASE = 'Y' if min.FDR < 0.05, 'N' if min.FDR >= 0.05

**The following column details were from obtained from LDProxy (https://ldsc.ncl.ac.uk/)**

RSID Identifier for the hetsNP

Alleles SNP alleles

MAF Minor allele frequency

Dprime Indicator of allelic segregation for two genetic variants

R2 Measure of correlation of alleles for two genetic variants.

| <b>17q21 ORFs</b> |          |
|-------------------|----------|
| ACBD4             | HEXIM1   |
| ADAM11            | HIGD1B   |
| ARHGAP27          | KANSL1   |
| ARL17A            | KIF18B   |
| ARL17B            | LRRC37A  |
| C1QL1             | LRRC37A2 |
| CCDC103           | MAP3K14  |
| CDC27             | MAPT     |
| CRHR1             | MYL4     |
| DBF4B             | NMT1     |
| DCAKD             | NSF      |
| EFTUD2            | PLEKHM1  |
| FMNL1             | RPRML    |
| GFAP              | SPPL2C   |
| GJC1              | STH      |
| GOSR2             | WNT3     |

**Supplementary Table 8. Complete list of the 32 ORFs in the 17q21 locus screened in the high content screen. (See Fig 9)**
